# Supplementary material
Source: ML conference proceedings conference paper supplement (https://openreview.net/forum?id=GXlsrvOGIK)

MLP, N=10

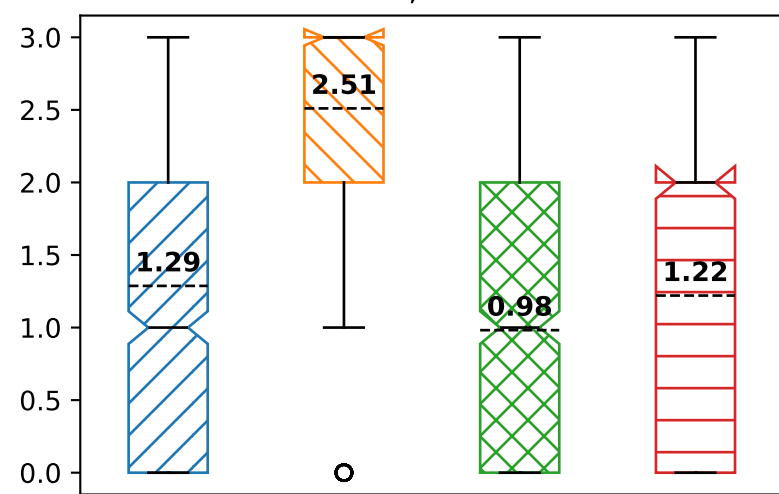

MLP, N=50

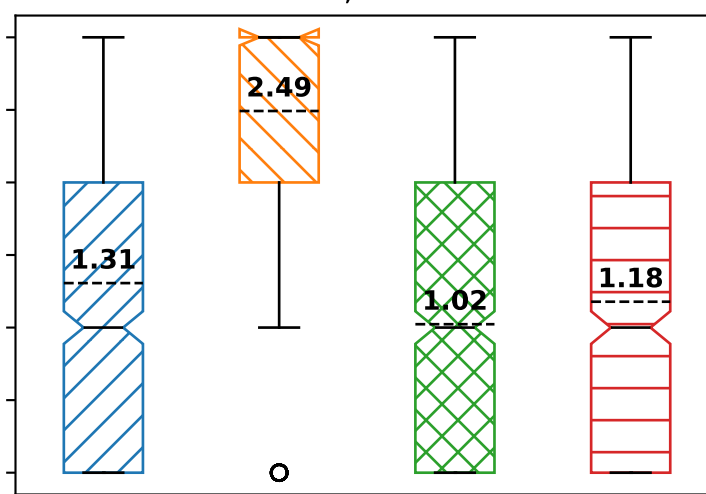

MLP, N=100

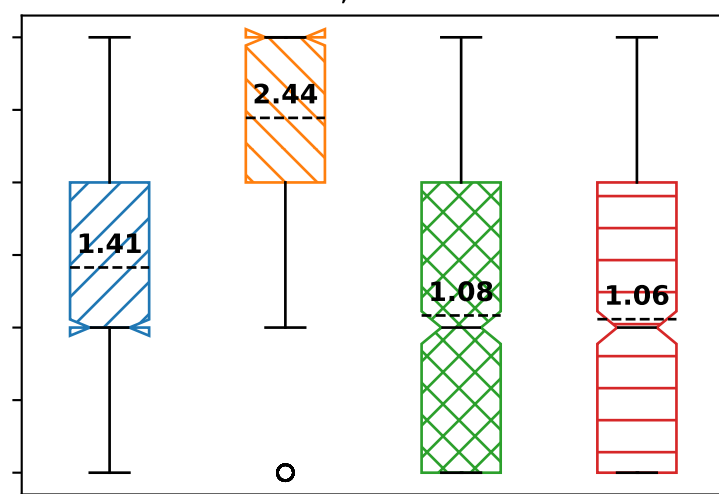

MLP-MultiHead, N=10

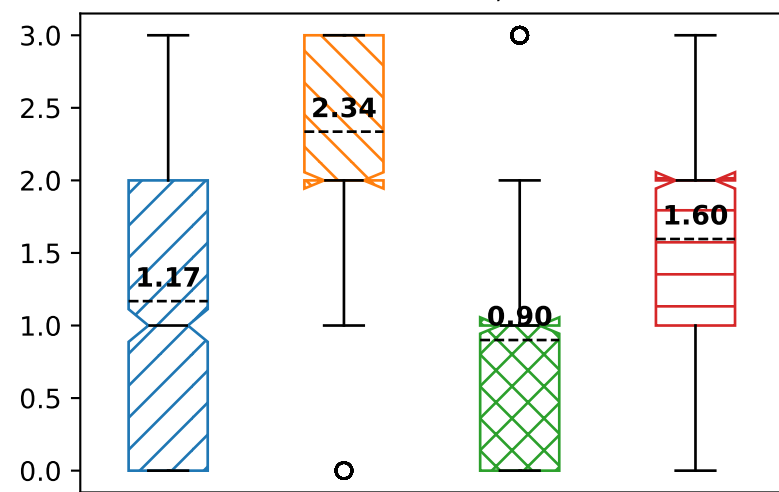

MLP-MultiHead, N=50

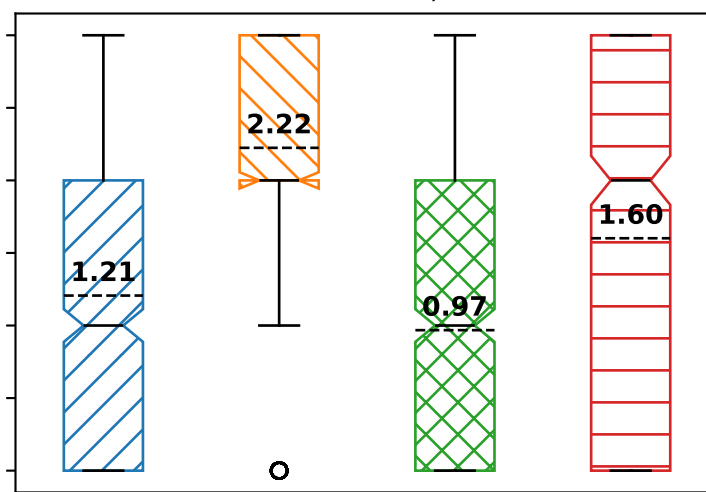

MLP-MultiHead, N=100

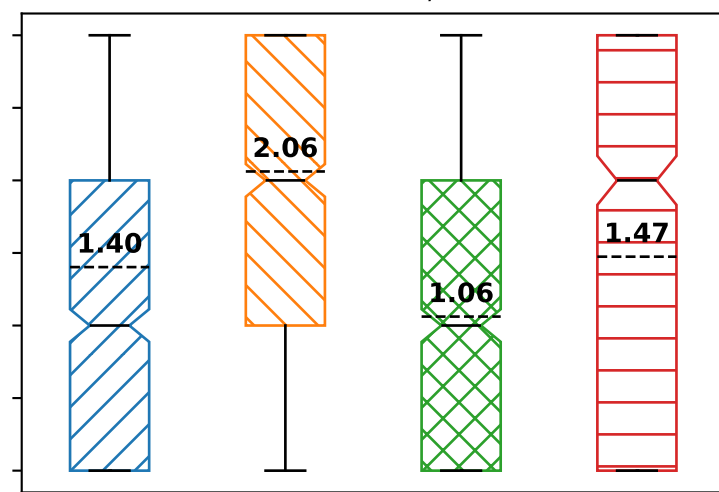

GNN, N=10

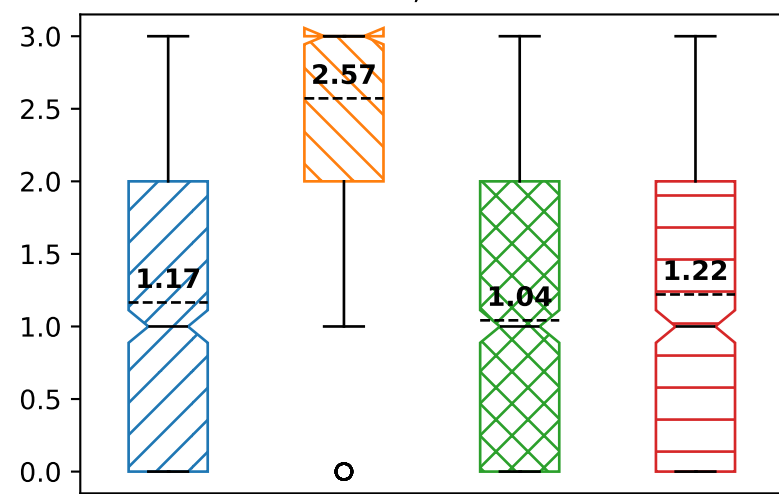

GNN, N=50

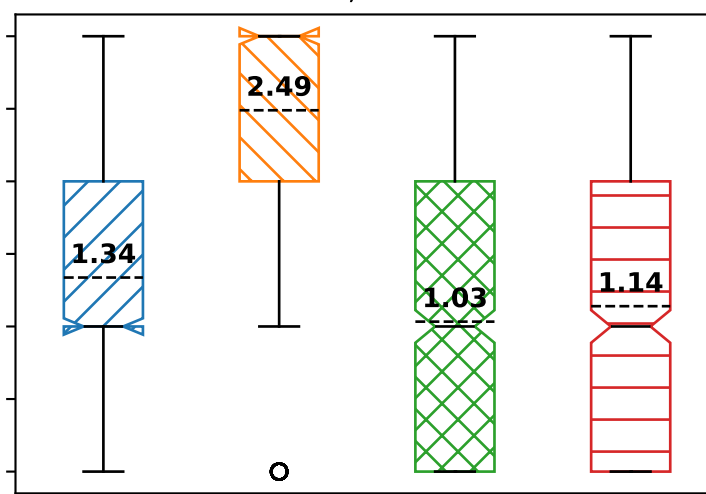

GNN, N=100

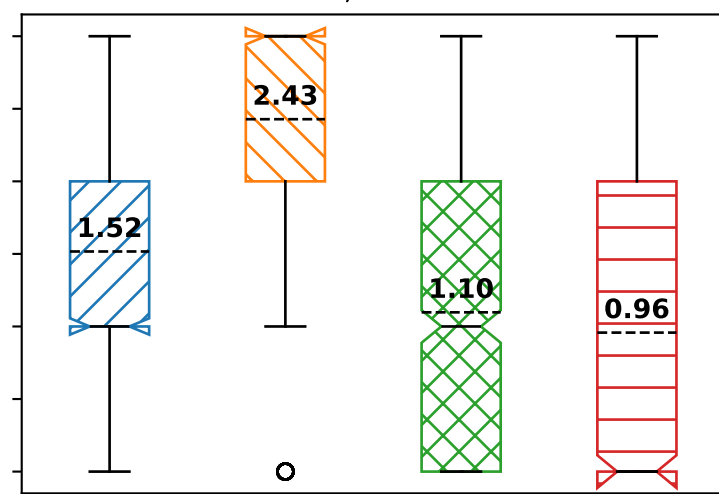

GNN-MultiHead, N=10

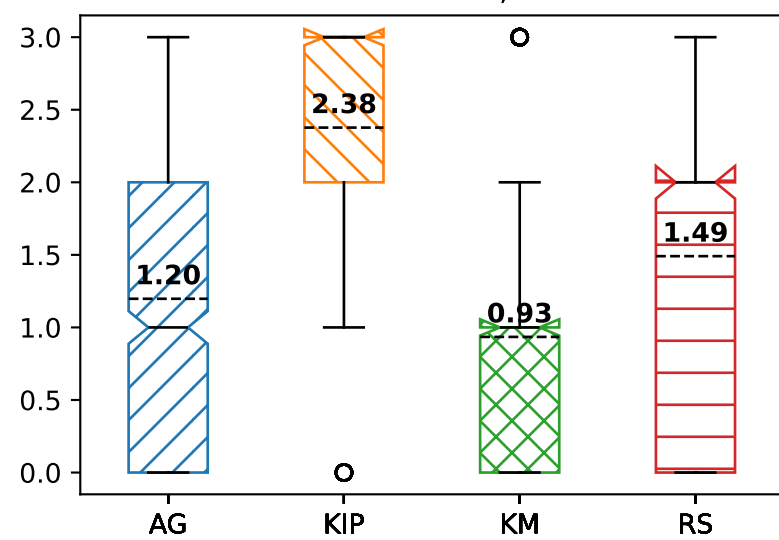

GNN-MultiHead, N=50

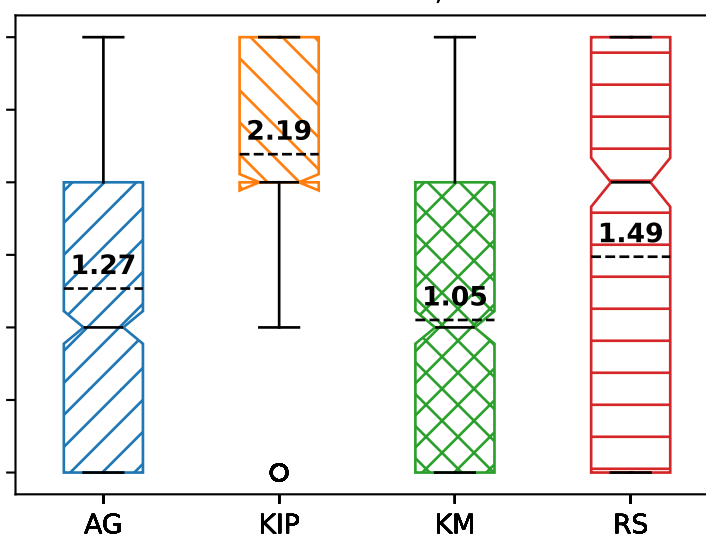

GNN-MultiHead, N=100

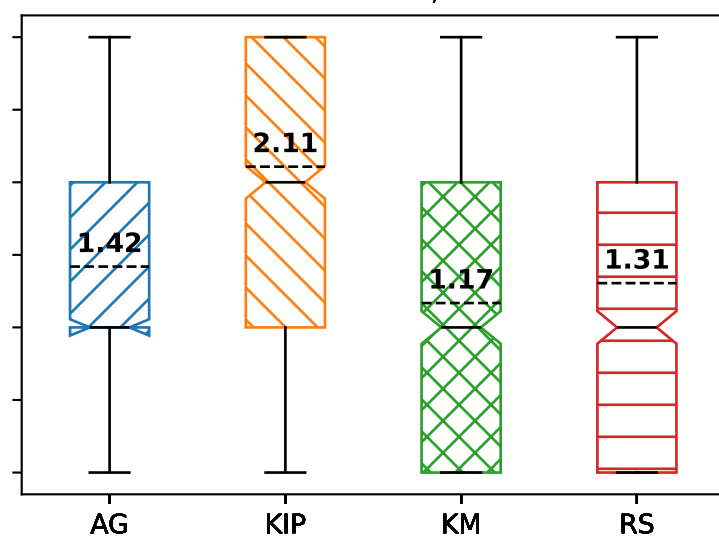

Supplement: supplementary_material [file attachment]
