# Supplementary material
Source: ML conference proceedings conference paper supplement (https://openreview.net/forum?id=GXlsrvOGIK)
Supplement: supplementary_material [file attachment]

N=10, RS

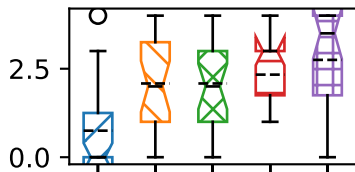

N=10, KM

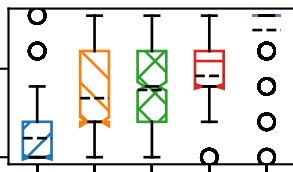

N=10, AG

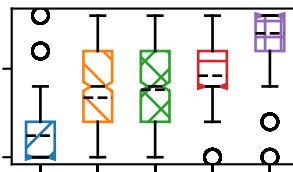

N=10, KIP

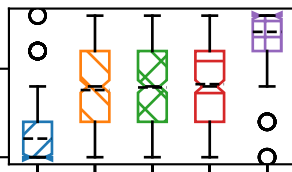

N=50, RS

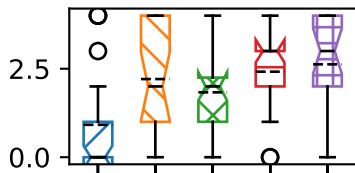

N=50, KM

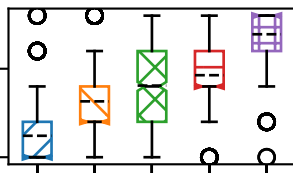

N=50, AG

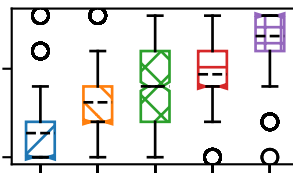

N=50, KIP

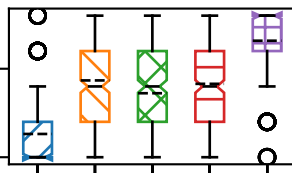

N=100, RS

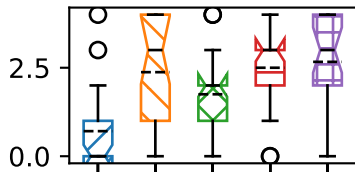

N=100, KM

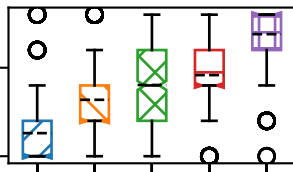

N=100, AG

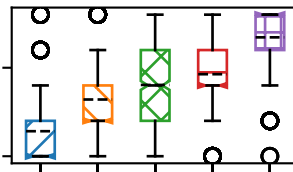

N=100, KIP

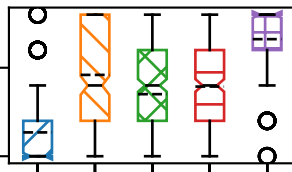

NB KNN LR MLPXGB

NB KNN LR MLPXGB

NB KNN LR MLPXGB

NB KNN LR MLPXGB
