# Supplementary material
Source: ML conference proceedings conference paper supplement (https://openreview.net/forum?id=GXlsrvOGIK)
Supplement: supplementary_material [file attachment]

RS

0

0.47

0.77

0.43

AG

0.53

0

0.75

0.42

KIP

0.23

0.25

0

0.18

KM

0.57

0.58

0.82

0

RS

AG

KIP

KM
