# Supplementary material
Source: ML conference proceedings conference paper supplement (https://openreview.net/forum?id=GXlsrvOGIK)
Supplement: supplementary_material [file attachment]

RS

0

0.34

0.8

0.3

AG

0.66

0

0.78

0.41

KIP

0.2

0.22

0

0.12

KM

0.7

0.59

0.88

0

RS

AG

KIP

KM
