# Supplementary material
Source: ML conference proceedings conference paper supplement (https://openreview.net/forum?id=GXlsrvOGIK)
Supplement: supplementary_material [file attachment]

RS

0

0.46

0.65

0.41

AG

0.54

0

0.71

0.42

KIP

0.35

0.29

0

0.22

KM

0.59

0.58

0.78

0

RS

AG

KIP

KM
