# Supplementary material
Source: ML conference proceedings conference paper supplement (https://openreview.net/forum?id=GXlsrvOGIK)
Supplement: supplementary_material [file attachment]

N=10, FFNN=10, FFN-FTN=10, GNN=10, GNN-FT N=10, TF N=10, TF-FT

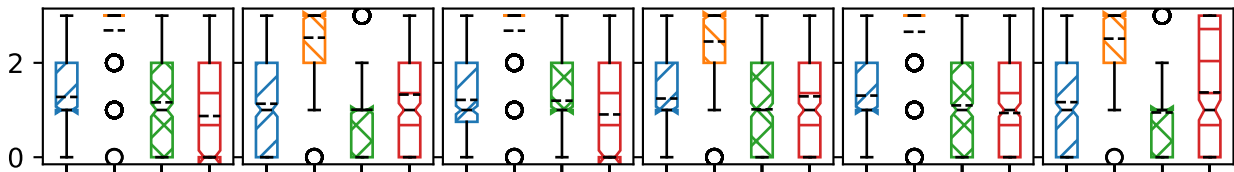

N=50, FFNN=50, FFN-FTN=50, GNN=50, GNN-FT N=50, TF N=50, TF-FT

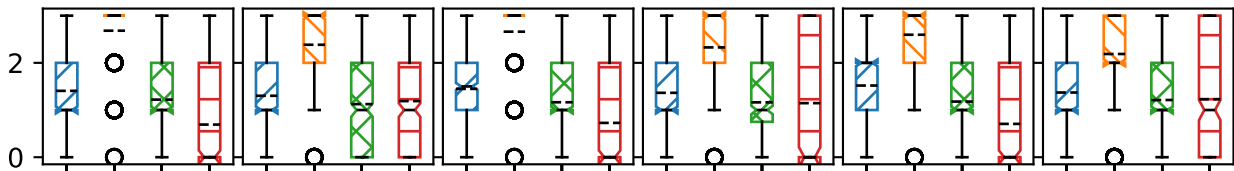

N=100, FFNN=100, FFN-FTN=100, GNN=100, GNN-FTN=100, TF N=100, TF-FT

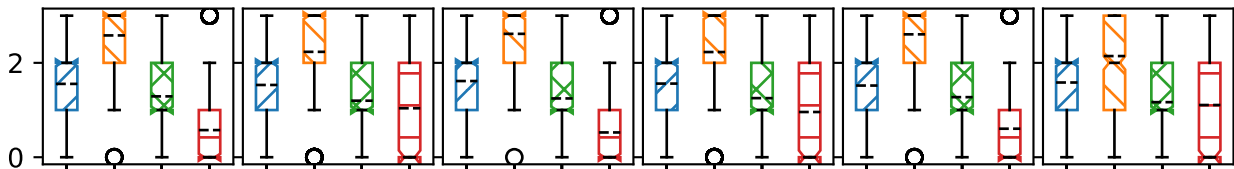

AG KIP KM RS AG KIP KM RS
