# Supplementary material
Source: ML conference proceedings conference paper supplement (https://openreview.net/forum?id=GXlsrvOGIK)
Supplement: supplementary_material [file attachment]

RS

0

0.63

0.87

0.61

AG

0.37

0

0.68

0.42

KIP

0.13

0.32

0

0.24

KM

0.39

0.58

0.76

0

RS

AG

KIP

KM
