# Supplementary material
Source: ML conference proceedings conference paper supplement (https://openreview.net/forum?id=GXlsrvOGIK)
Supplement: supplementary_material [file attachment]

$n/L=10$ , AG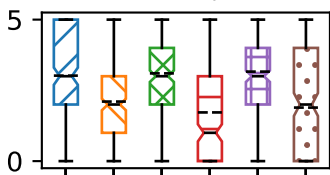 $n/L=10$ , KM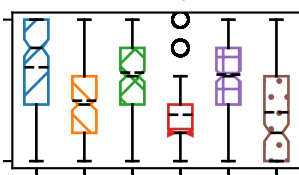 $n/L=10$ , KIP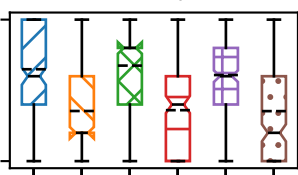 $n/L=50$ , AG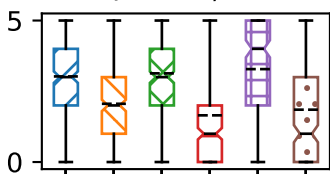 $n/L=50$ , KM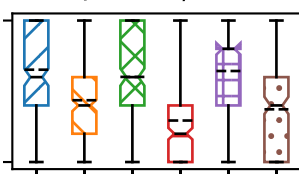 $n/L=50$ , KIP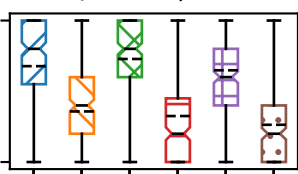 $n/L=100$ , AG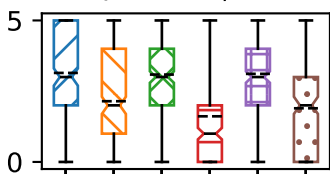 $n/L=100$ , KM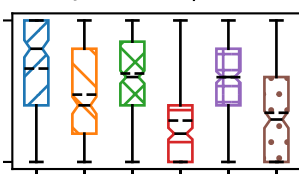 $n/L=100$ , KIP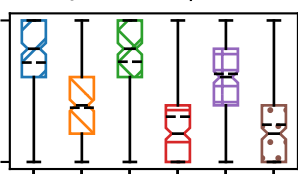

GNN GNN-FFN FFN-FT TF-FT GNN GNN-FFN FFN-FT TF-FT GNN GNN-FFN FFN-FT TF-FT
