# Supplementary material
Source: ML conference proceedings conference paper supplement (https://openreview.net/forum?id=GXlsrvOGIK)
Supplement: supplementary_material [file attachment]

Naive Bayes

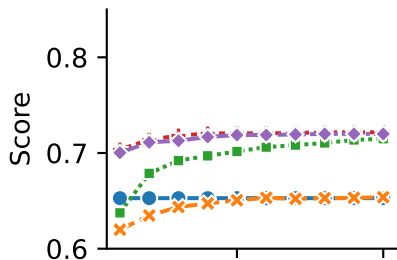

Nearest Neighbors

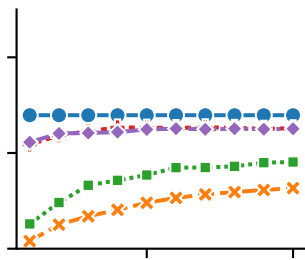

LR

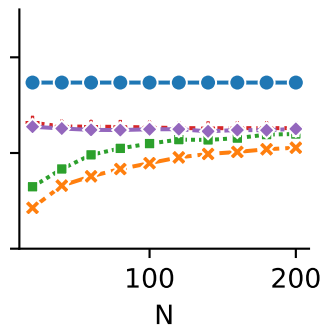

MLP

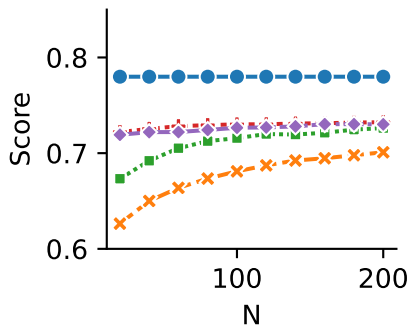

XGBoost

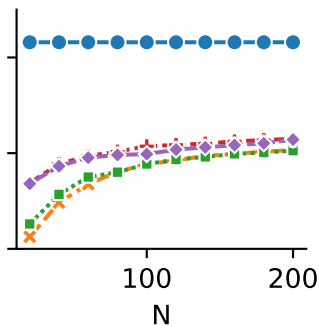

Mode

- Original
- Random Sample
- KIP + MLP-MH
- KMeans + MLP-MH
- Agglo + MLP-MH
