# Supplementary material
Source: ML conference proceedings conference paper supplement (https://openreview.net/forum?id=GXlsrvOGIK)
Supplement: supplementary_material [file attachment]

N=10, KMeans

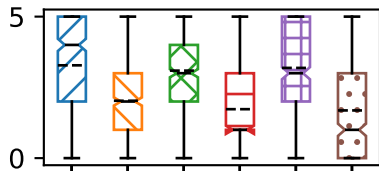

N=10, Agglo

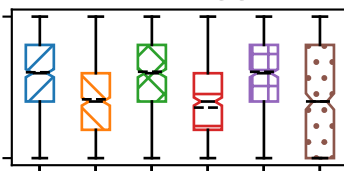

N=10, KIP

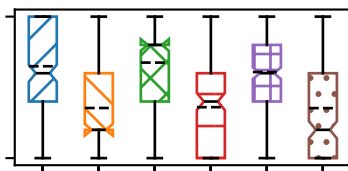

N=50, KMeans

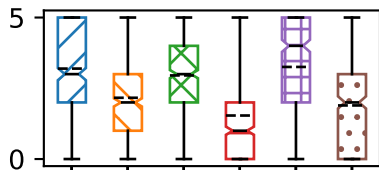

N=50, Agglo

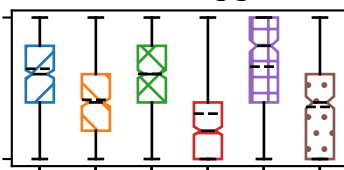

N=50, KIP

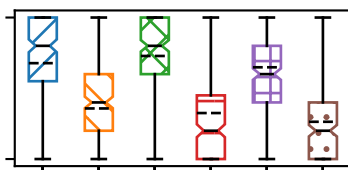

N=100, KMeans

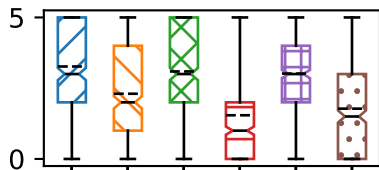

N=100, Agglo

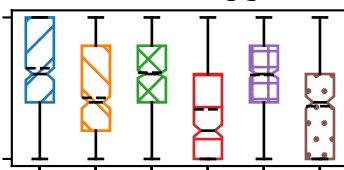

N=100, KIP

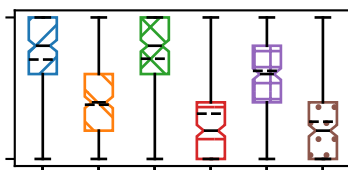

GNN  
GNN-FT  
FFN  
FFN-FT  
TF  
TF-FT

GNN  
GNN-FT  
FFN  
FFN-FT  
TF  
TF-FT

GNN  
GNN-FT  
FFN  
FFN-FT  
TF  
TF-FT
