# Supplementary material
Source: ML conference proceedings conference paper supplement (https://openreview.net/forum?id=GXlsrvOGIK)
Supplement: supplementary_material [file attachment]

RS

0

0.45

0.75

0.39

AG

0.55

0

0.79

0.41

KIP

0.25

0.21

0

0.16

KM

0.61

0.59

0.84

0

RS

AG

KIP

KM
