# Supplementary material
Source: ML conference proceedings conference paper supplement (https://openreview.net/forum?id=GXlsrvOGIK)
Supplement: supplementary_material [file attachment]

RS

0

0.49

0.78

0.43

AG

0.51

0

0.77

0.43

KIP

0.22

0.23

0

0.16

KM

0.57

0.57

0.84

0

RS

AG

KIP

KM
