# Supplementary material
Source: ML conference proceedings conference paper supplement (https://openreview.net/forum?id=GXlsrvOGIK)

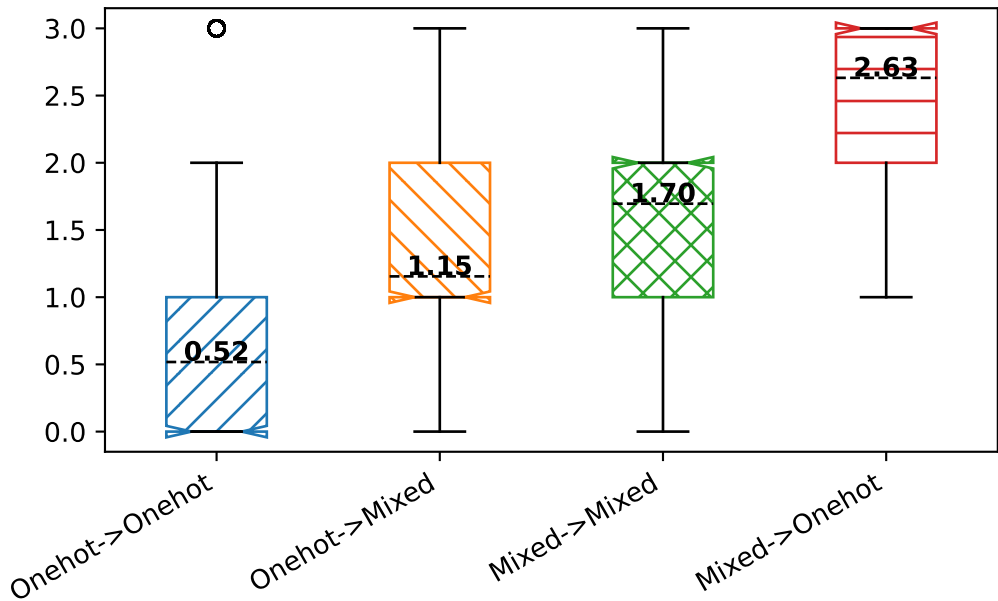

Supplement: supplementary_material [file attachment]

N=20

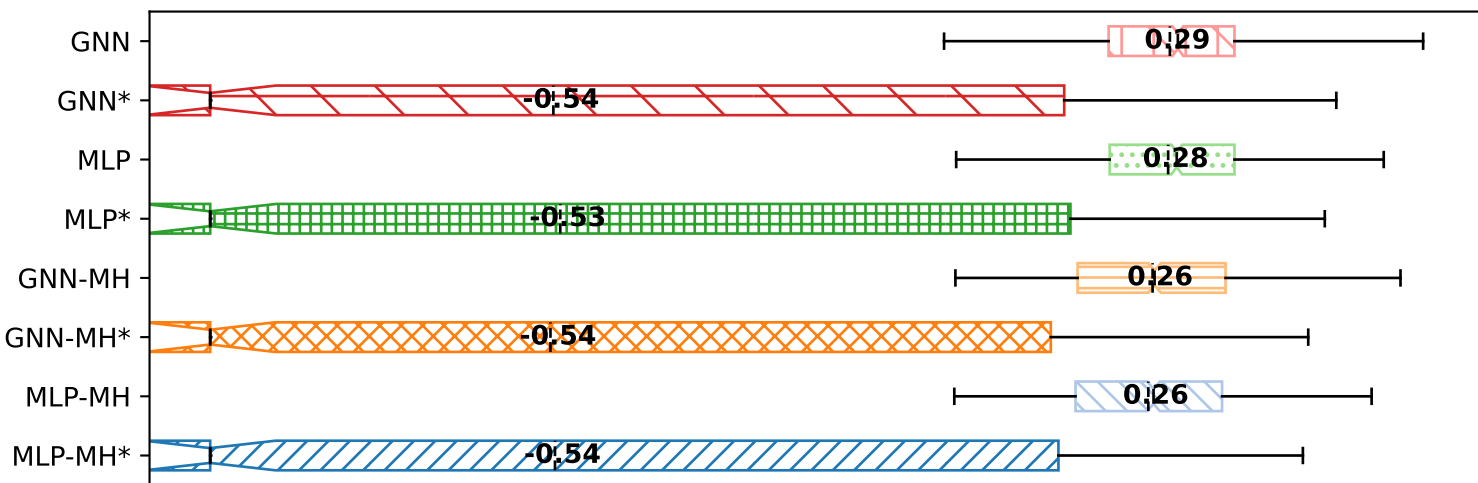

N=100

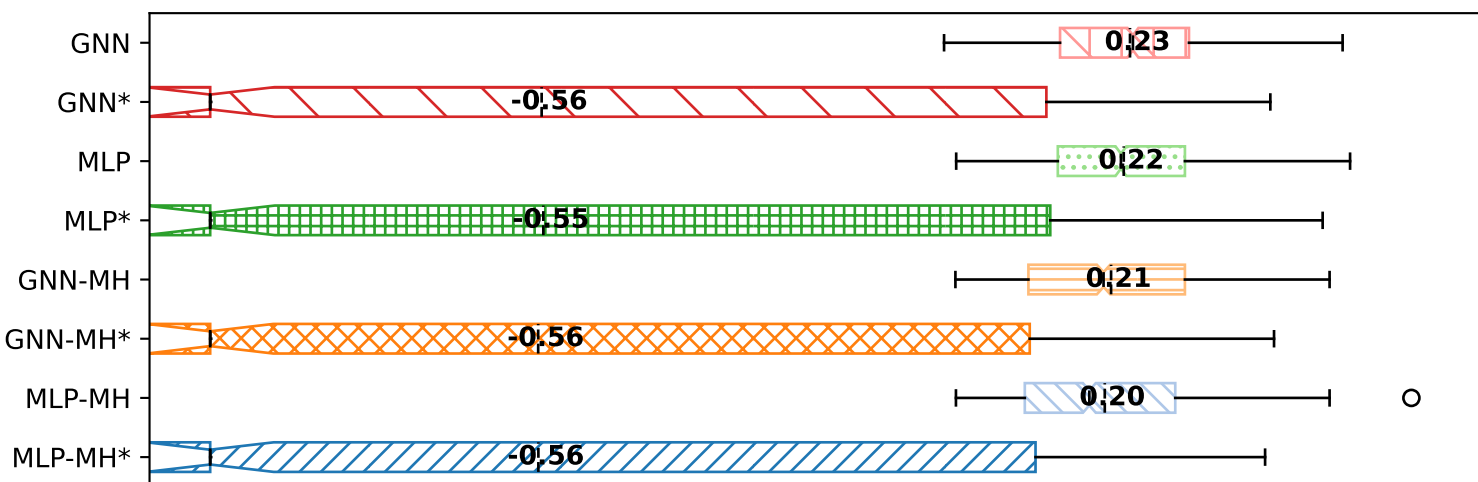

N=200

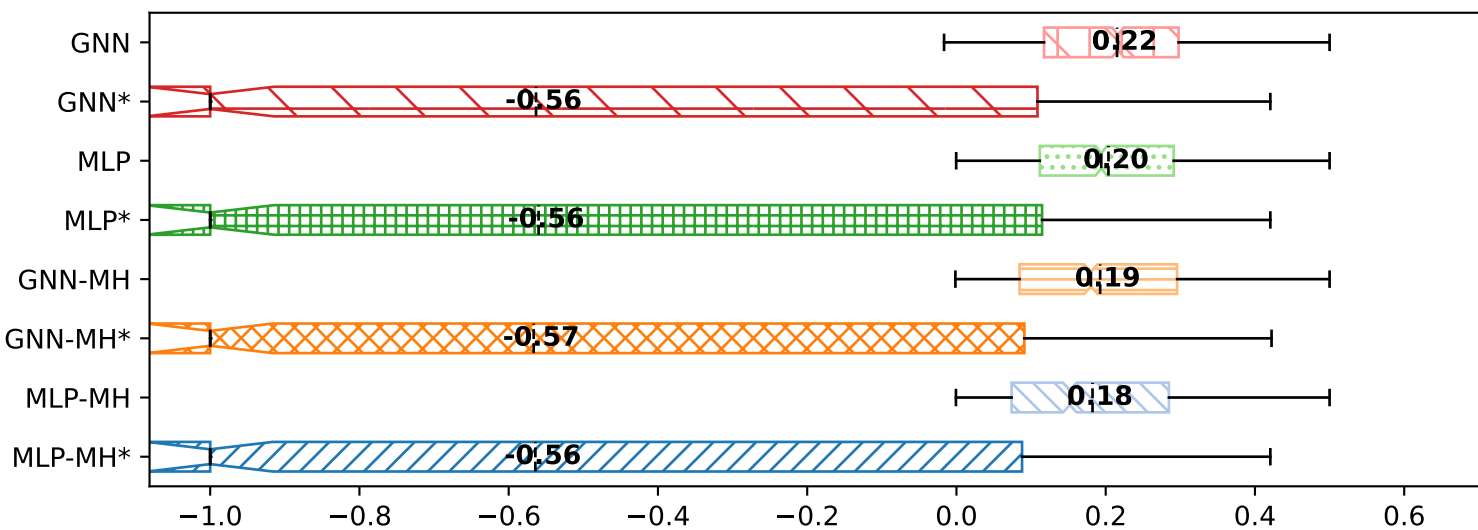

Supplement: supplementary_material [file attachment]

Balanced Accuracy

TwoDPlanes

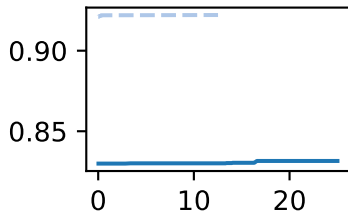

Pol

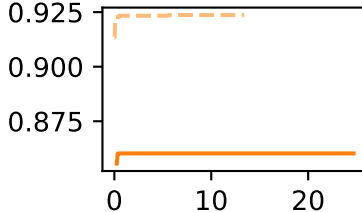

Jannis

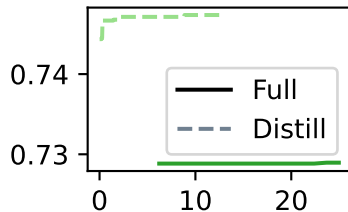

HomeEquityCredit

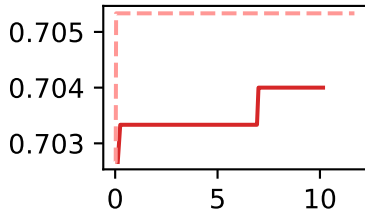

Adult

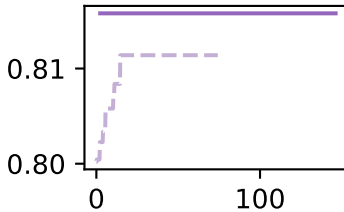

MagicTelescope

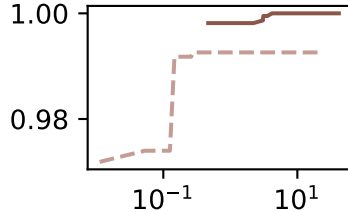

Time (s)

Supplement: supplementary_material [file attachment]

Overall

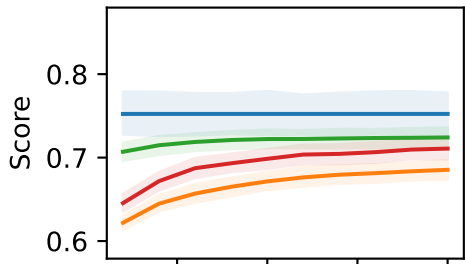

KNN

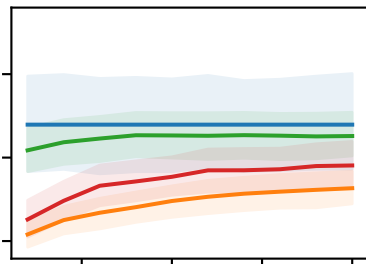

LR

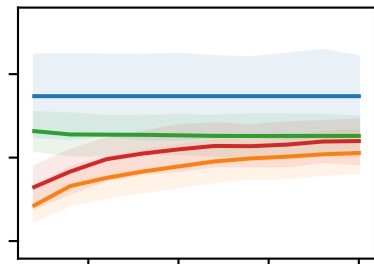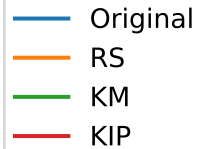

MLP

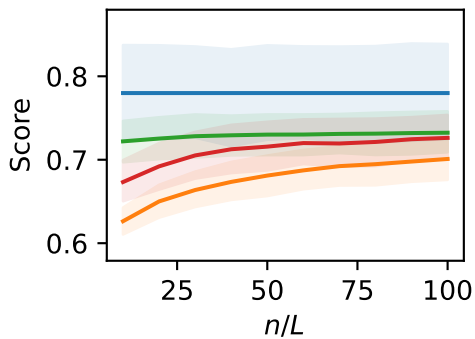

NB

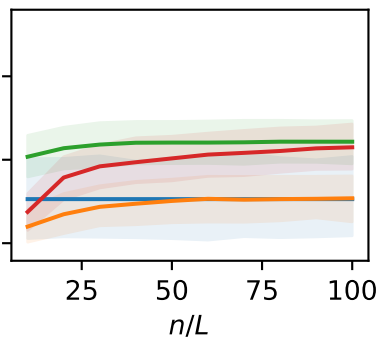

XGB

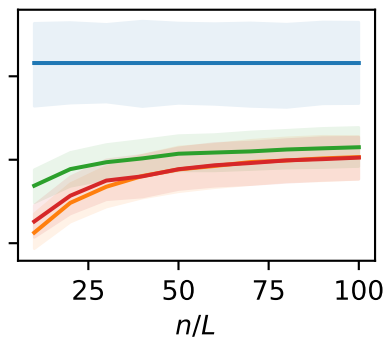

Supplement: supplementary_material [file attachment]

Rank per Encoder by Classifier and N

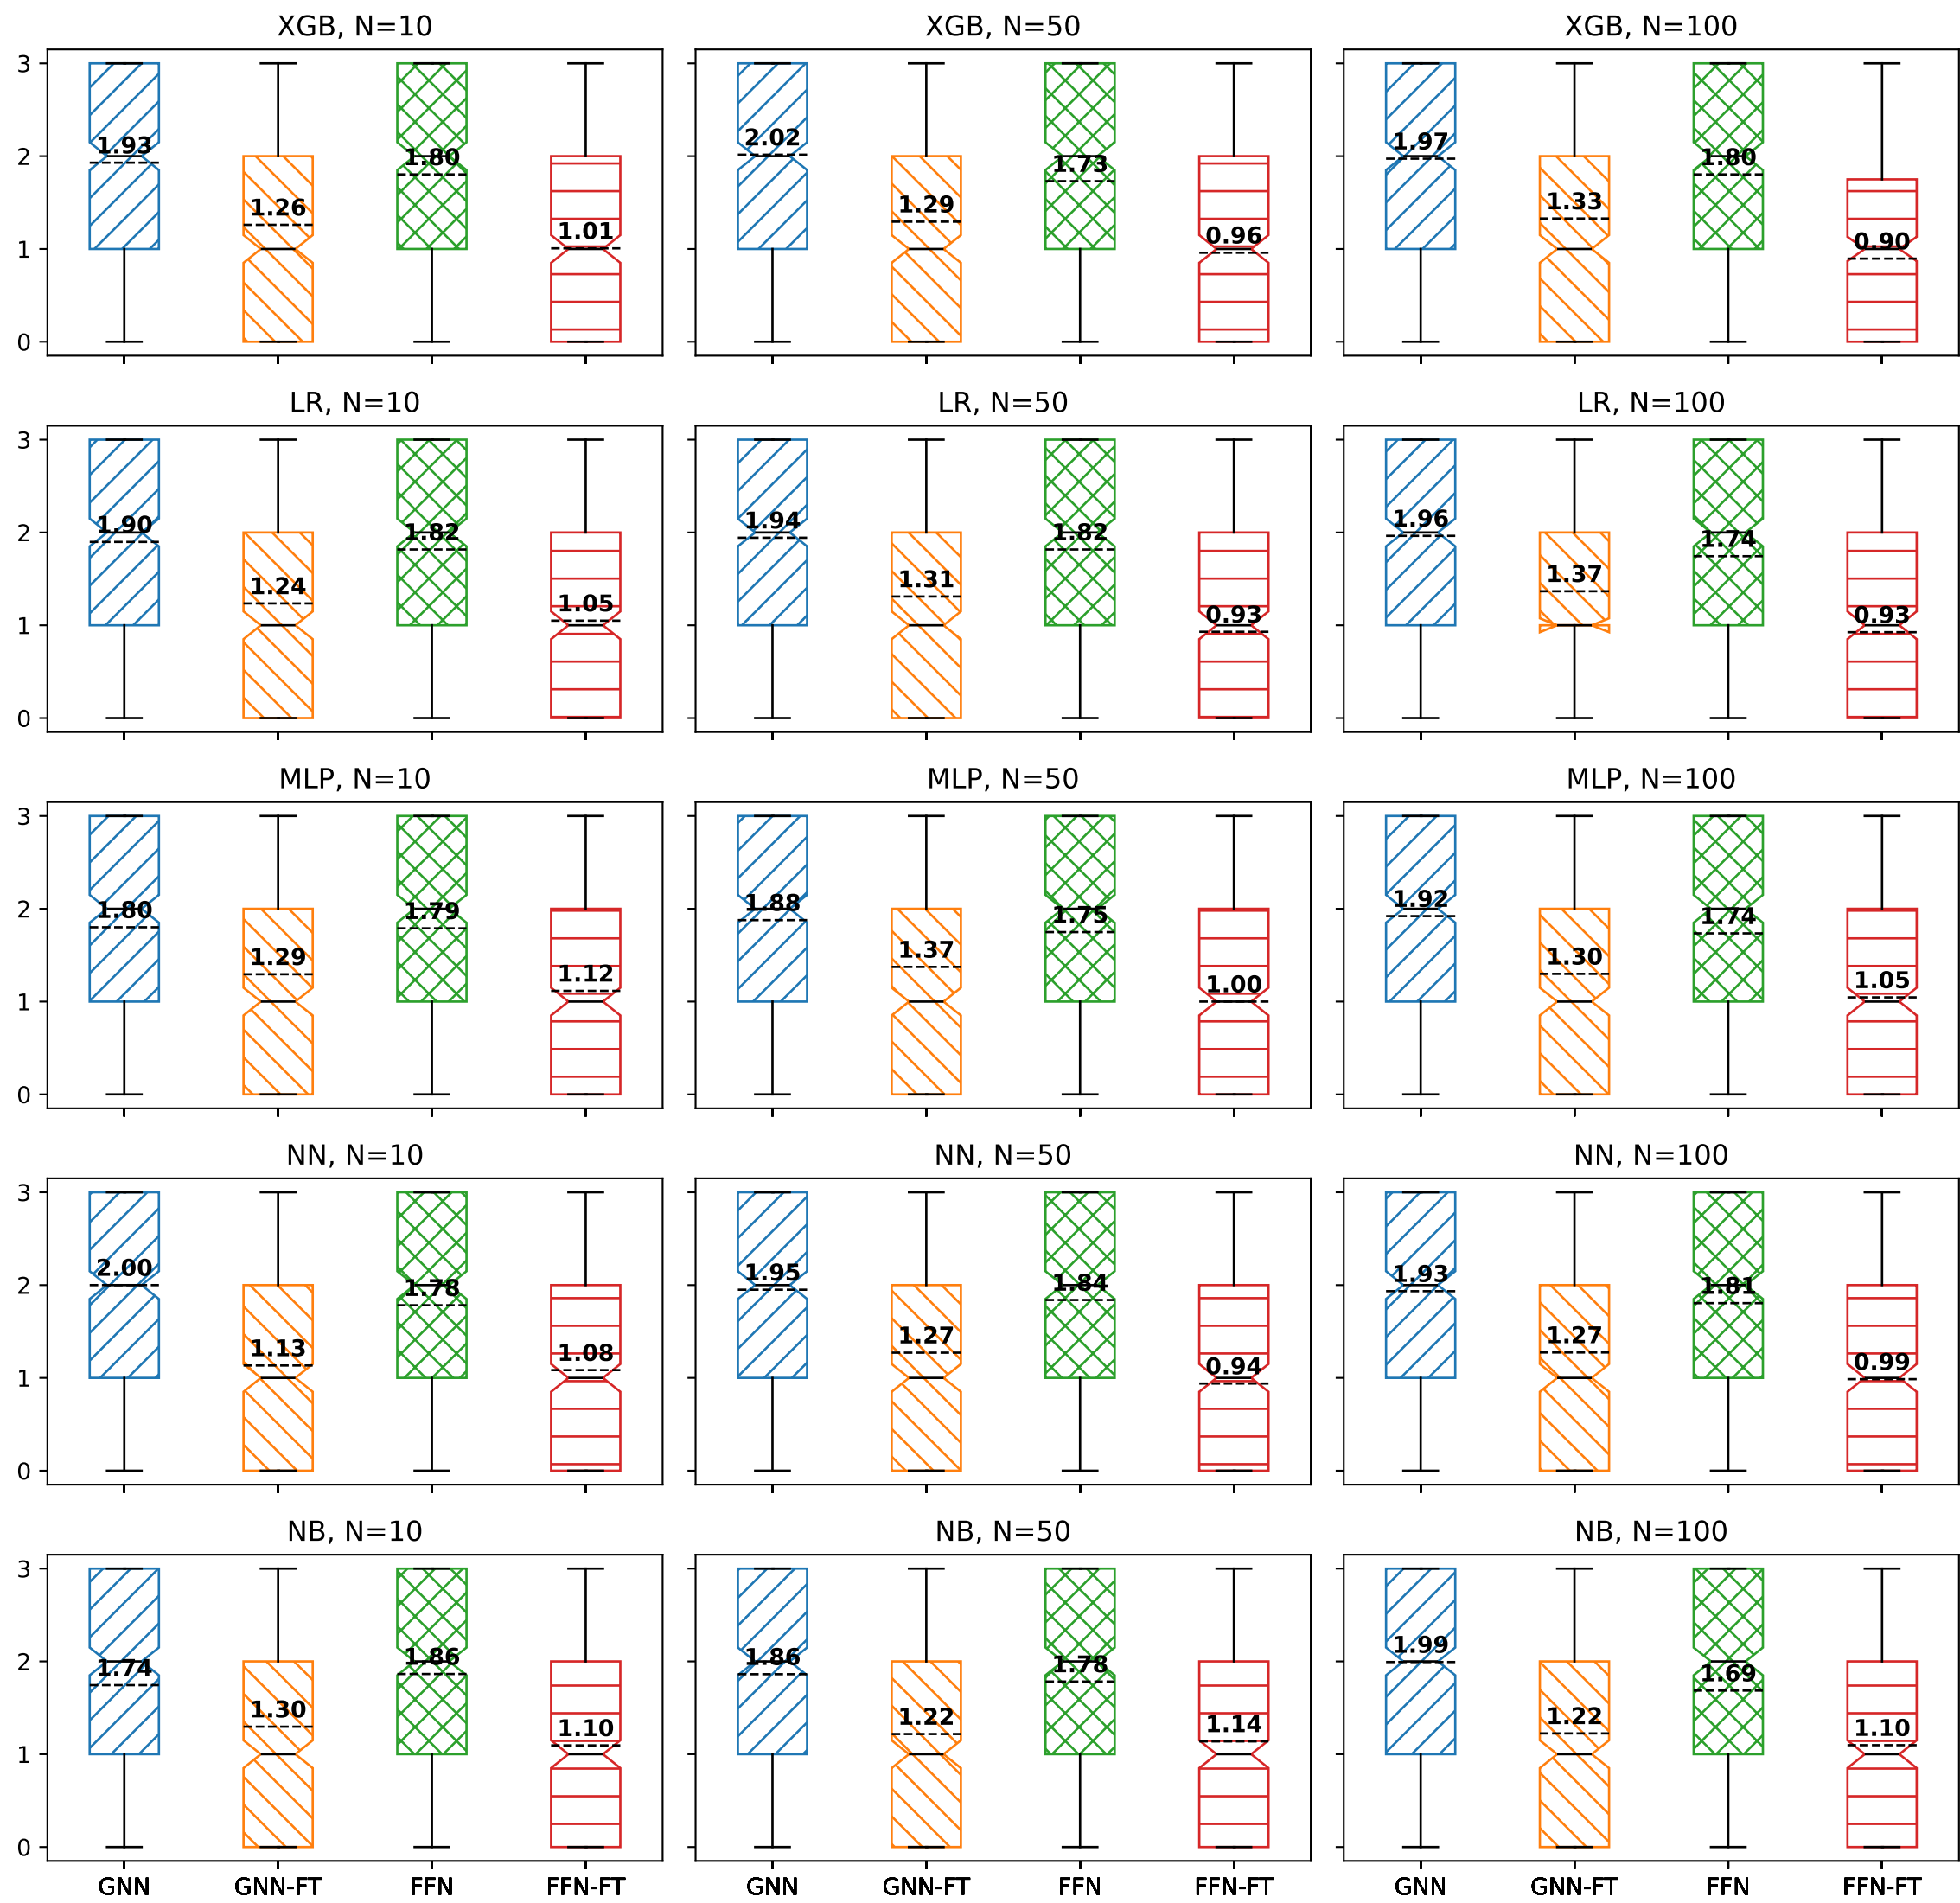

Supplement: supplementary_material [file attachment]

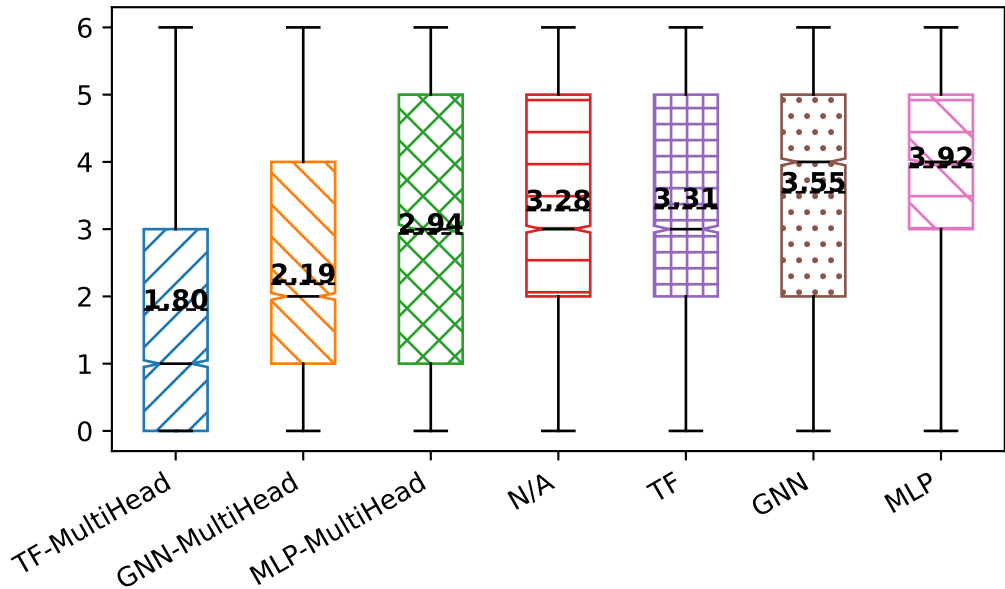

Supplement: supplementary_material [file attachment]

Original

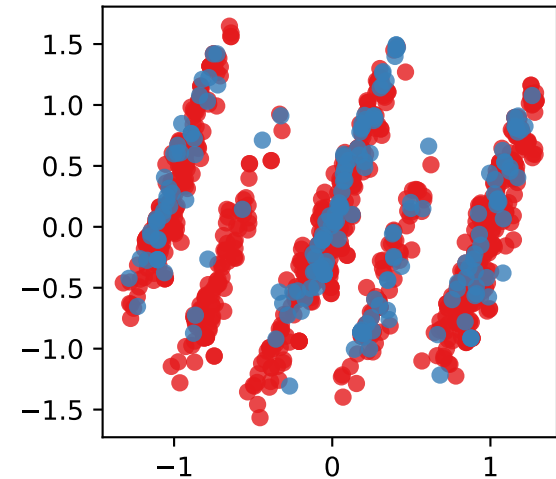

FFN Encoded

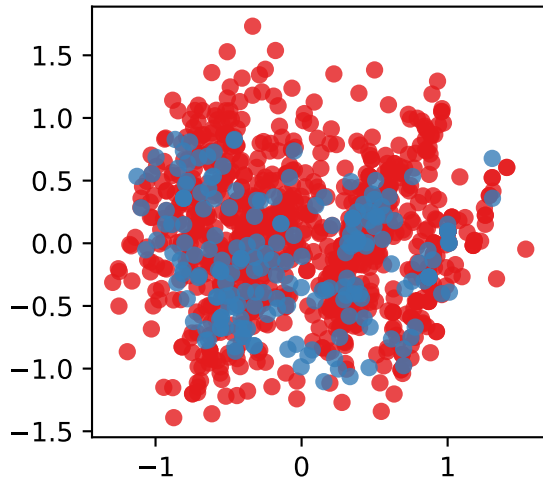

FFN-FT Encoded

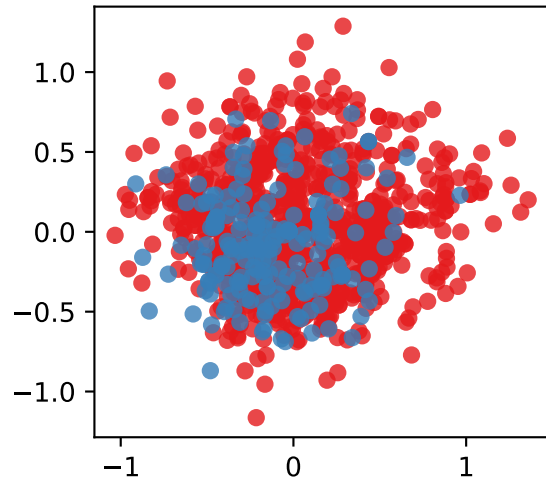

Supplement: supplementary_material [file attachment]

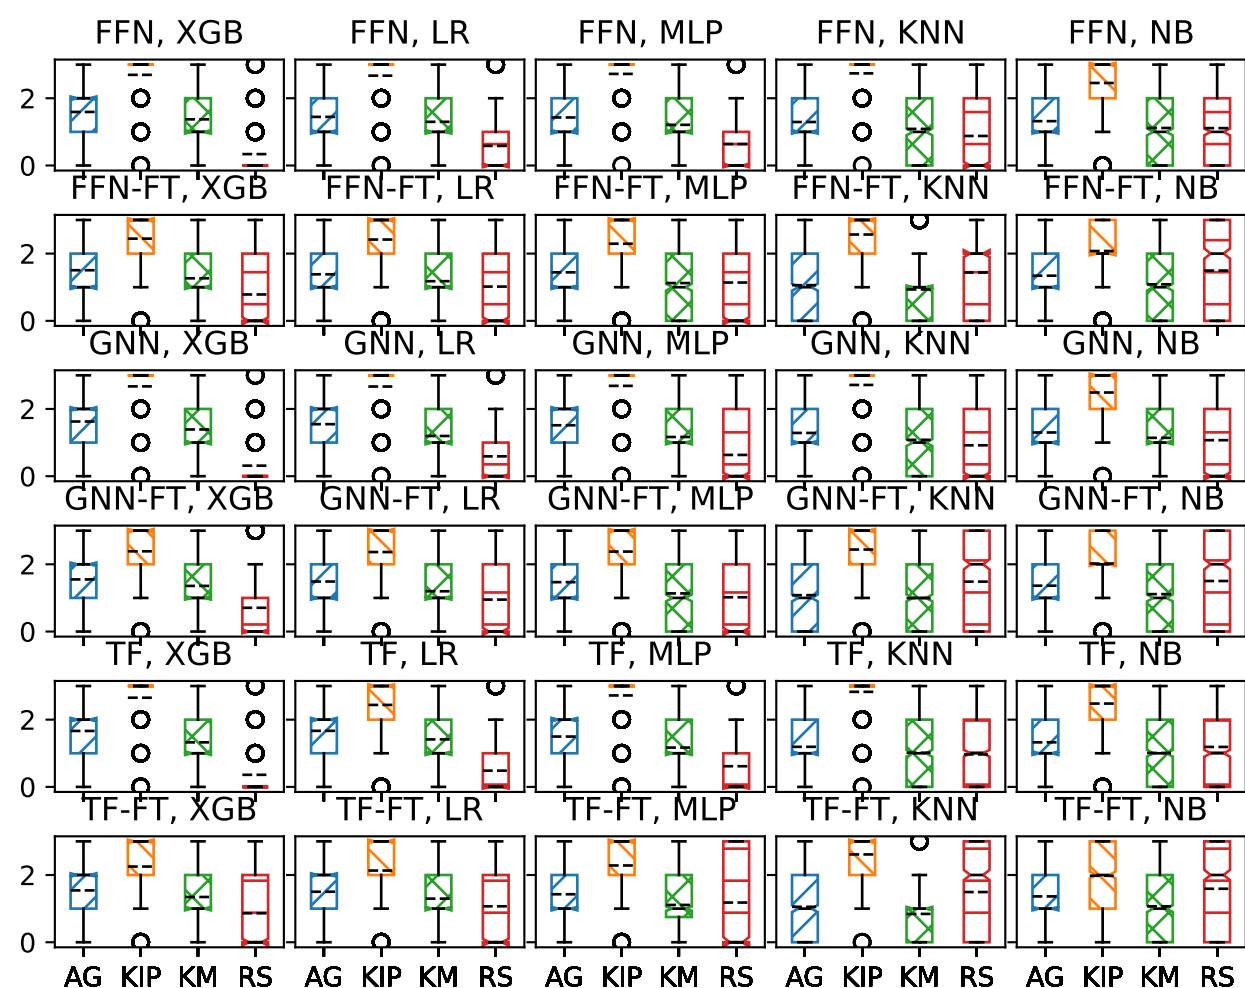

Supplement: supplementary_material [file attachment]

Dataset

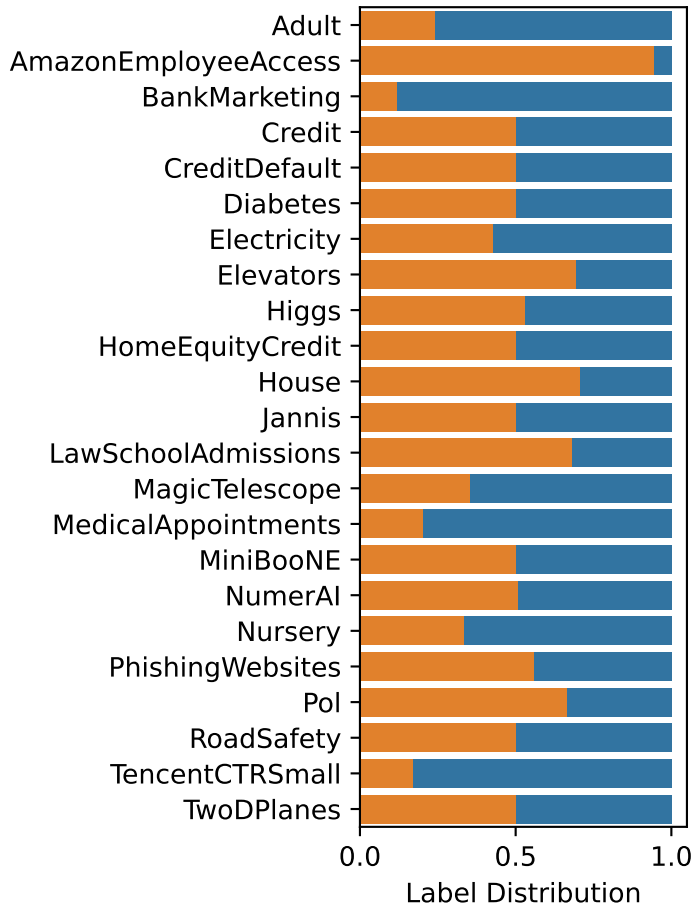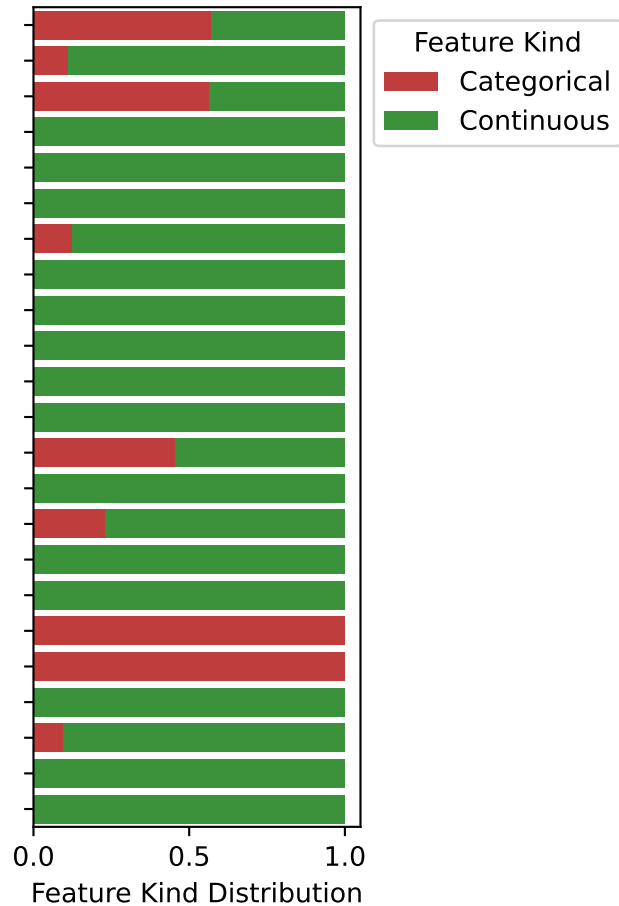

Supplement: supplementary_material [file attachment]

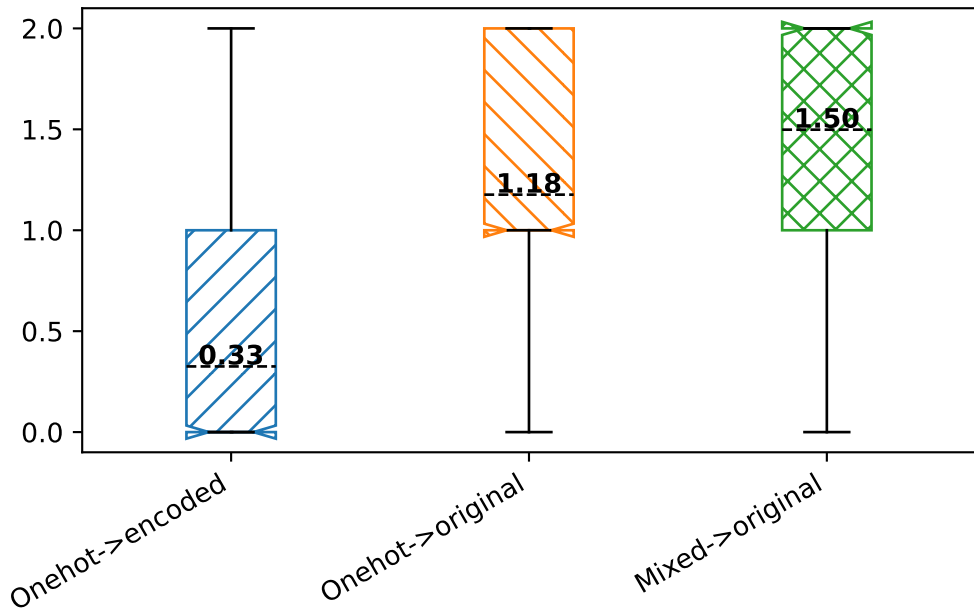

Supplement: supplementary_material [file attachment]

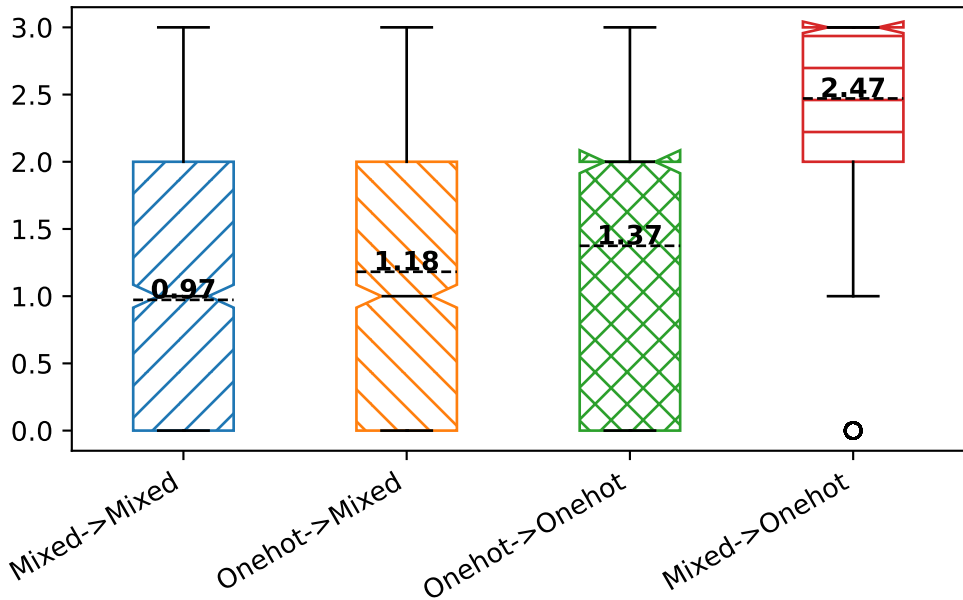

Supplement: supplementary_material [file attachment]

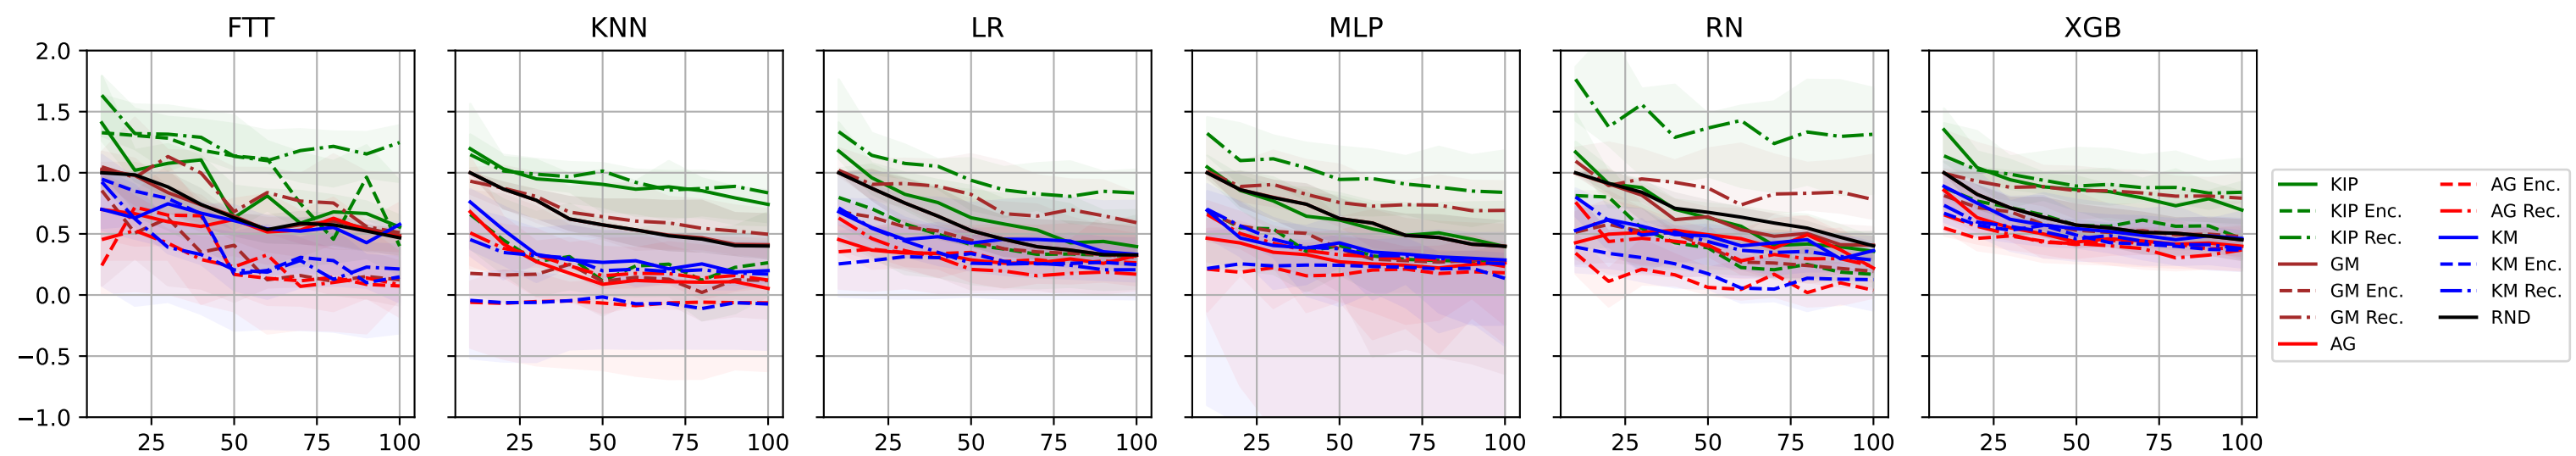

Supplement: supplementary_material [file attachment]

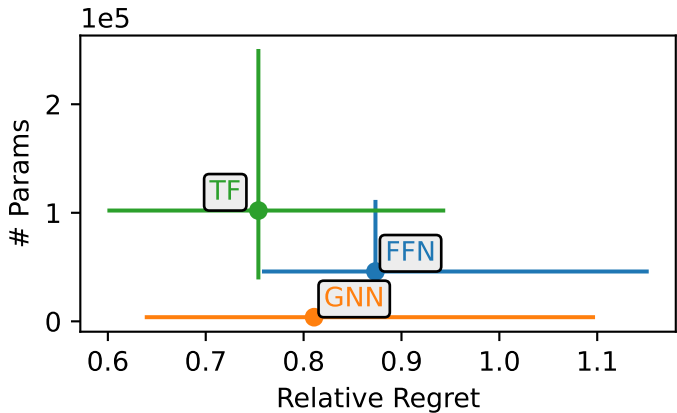

Supplement: supplementary_material [file attachment]

N=20

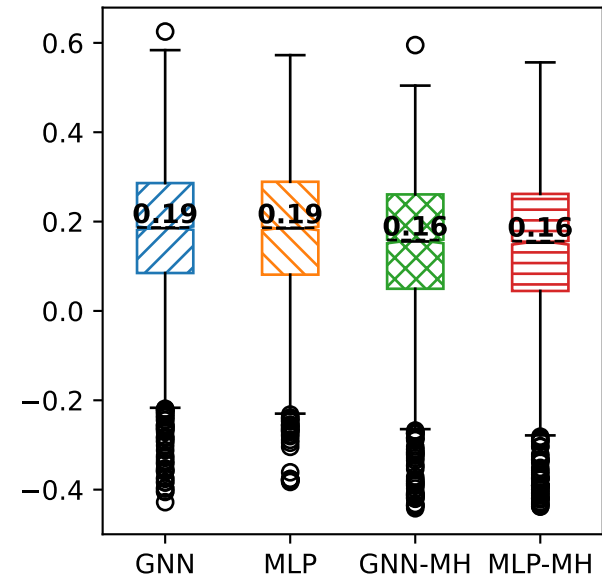

N=100

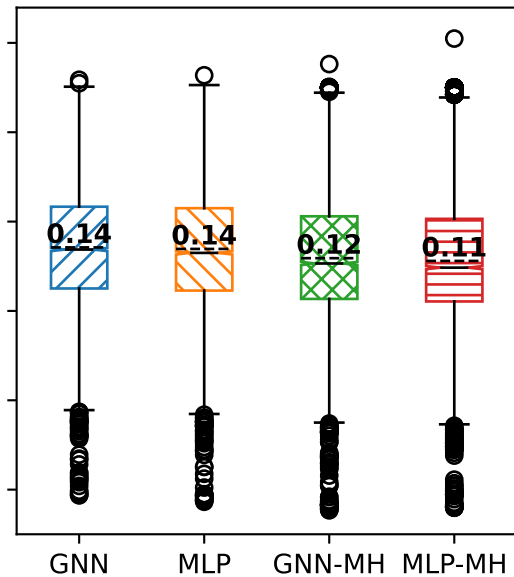

N=200

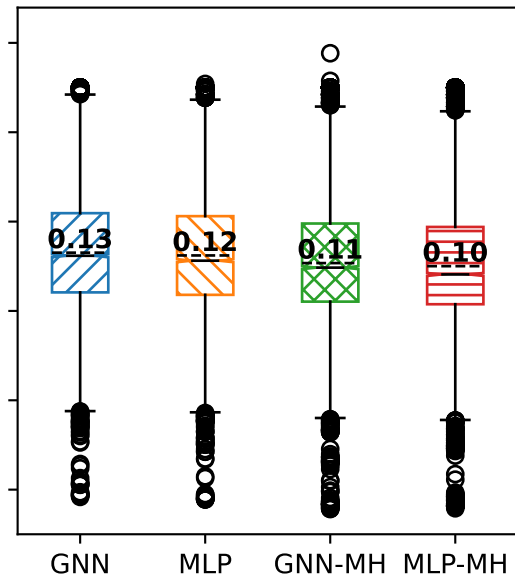

Supplement: supplementary_material [file attachment]

MLP

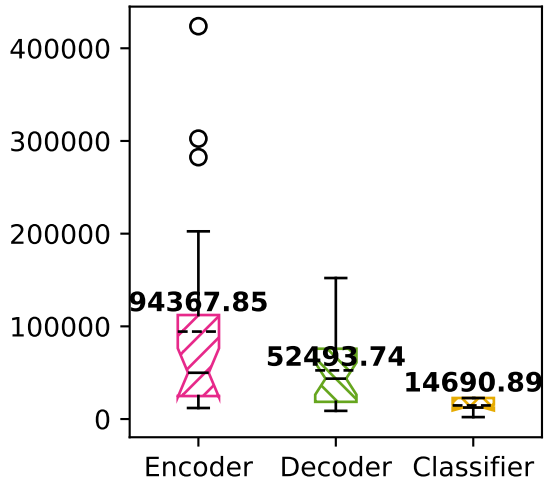

GNN

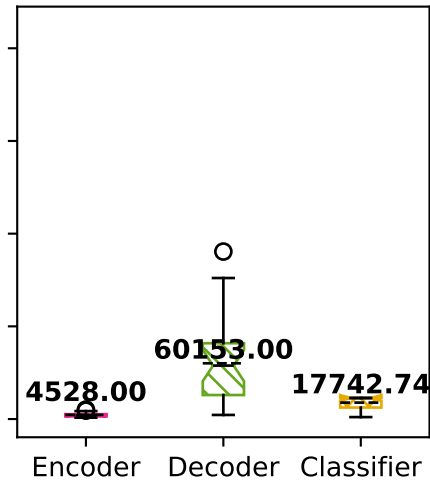

Supplement: supplementary_material [file attachment]

Original

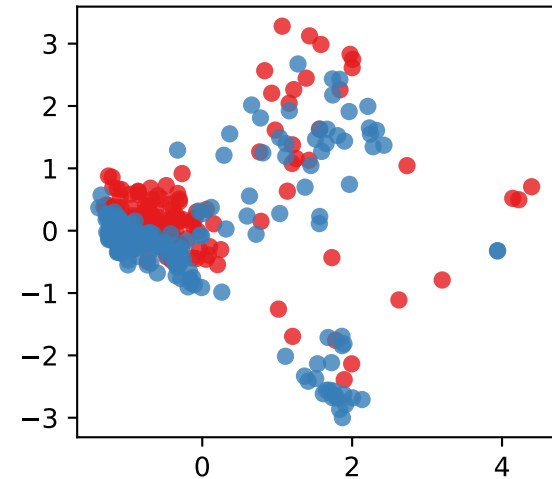

FFN Encoded

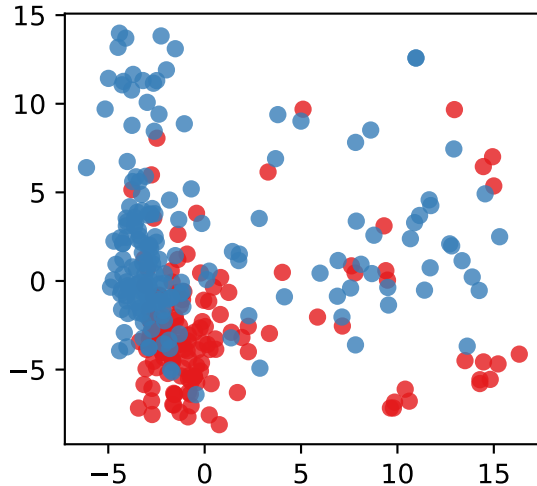

FFN-FT Encoded

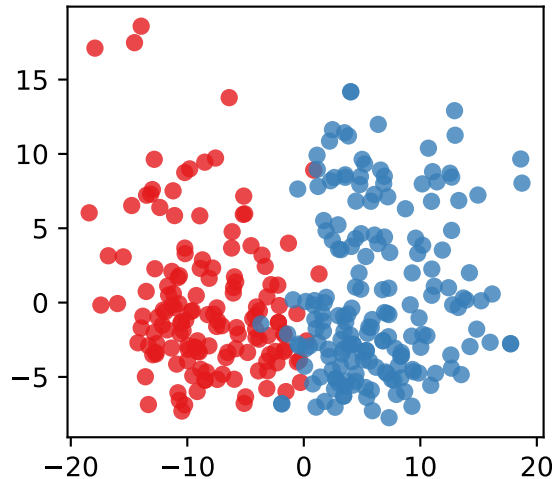

Supplement: supplementary_material [file attachment]

N=20

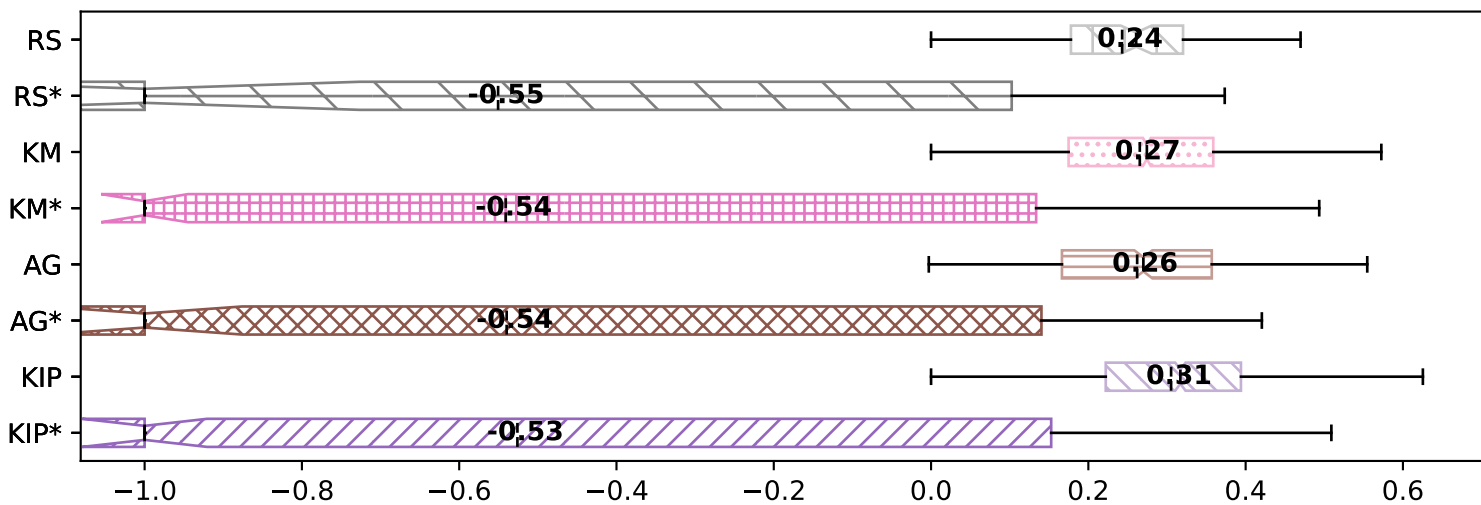

N=100

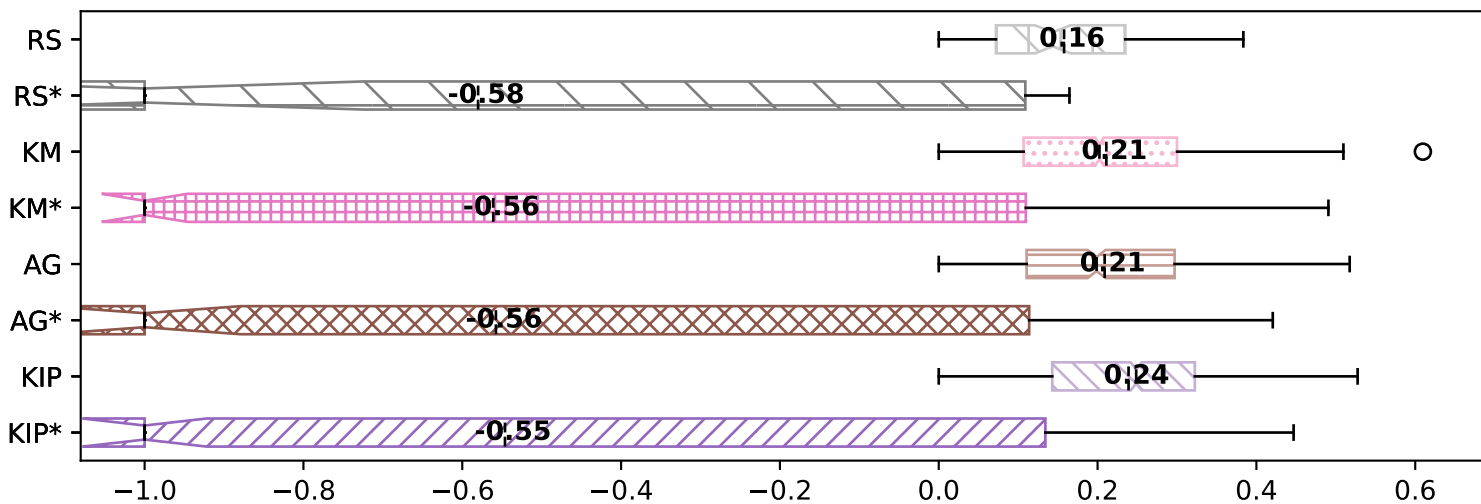

N=100

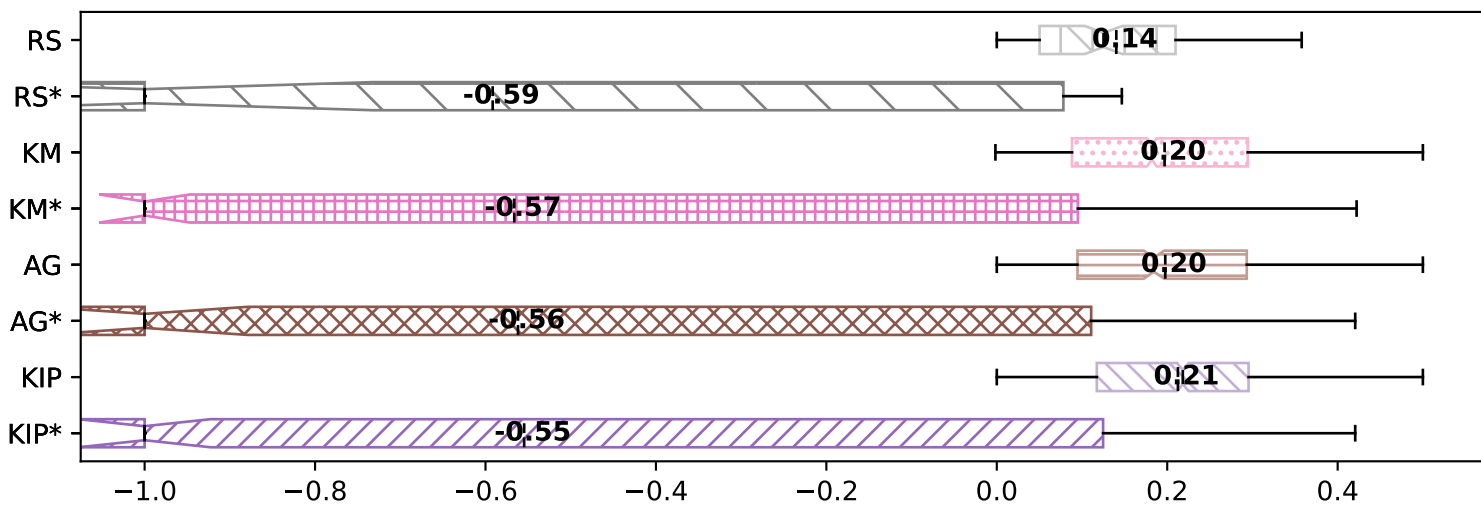

Supplement: supplementary_material [file attachment]

Dataset

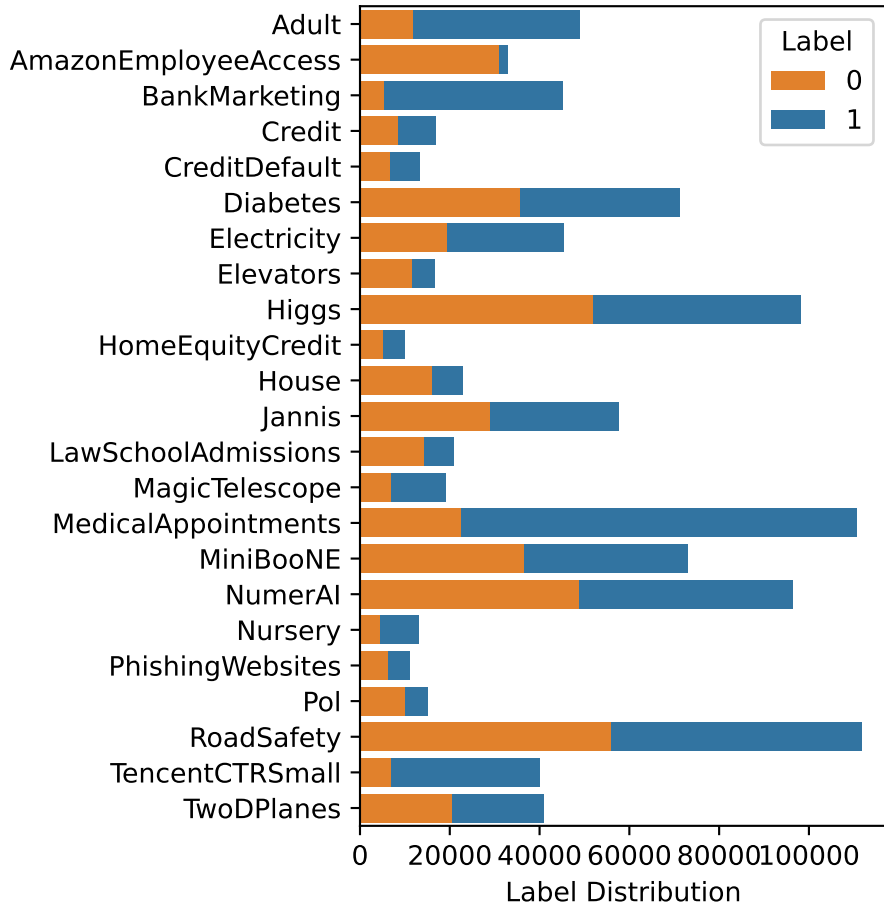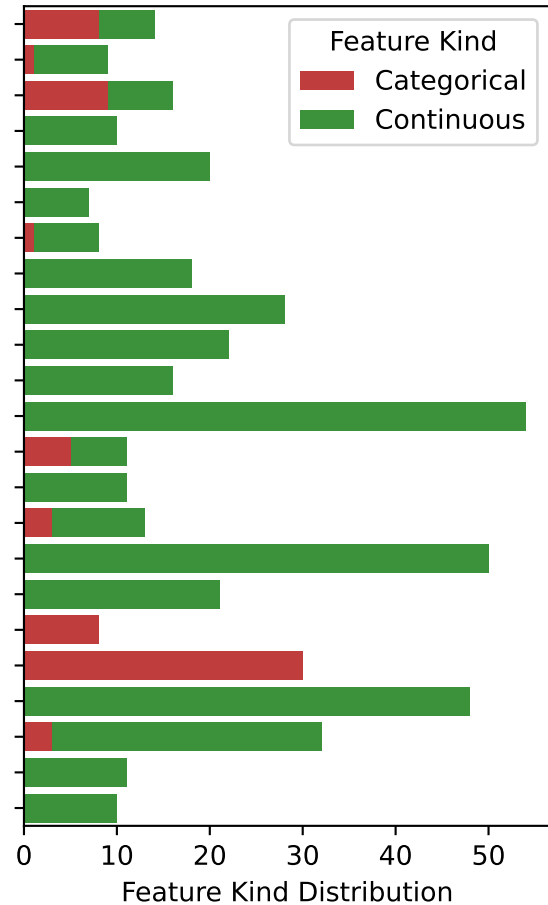

Supplement: supplementary_material [file attachment]

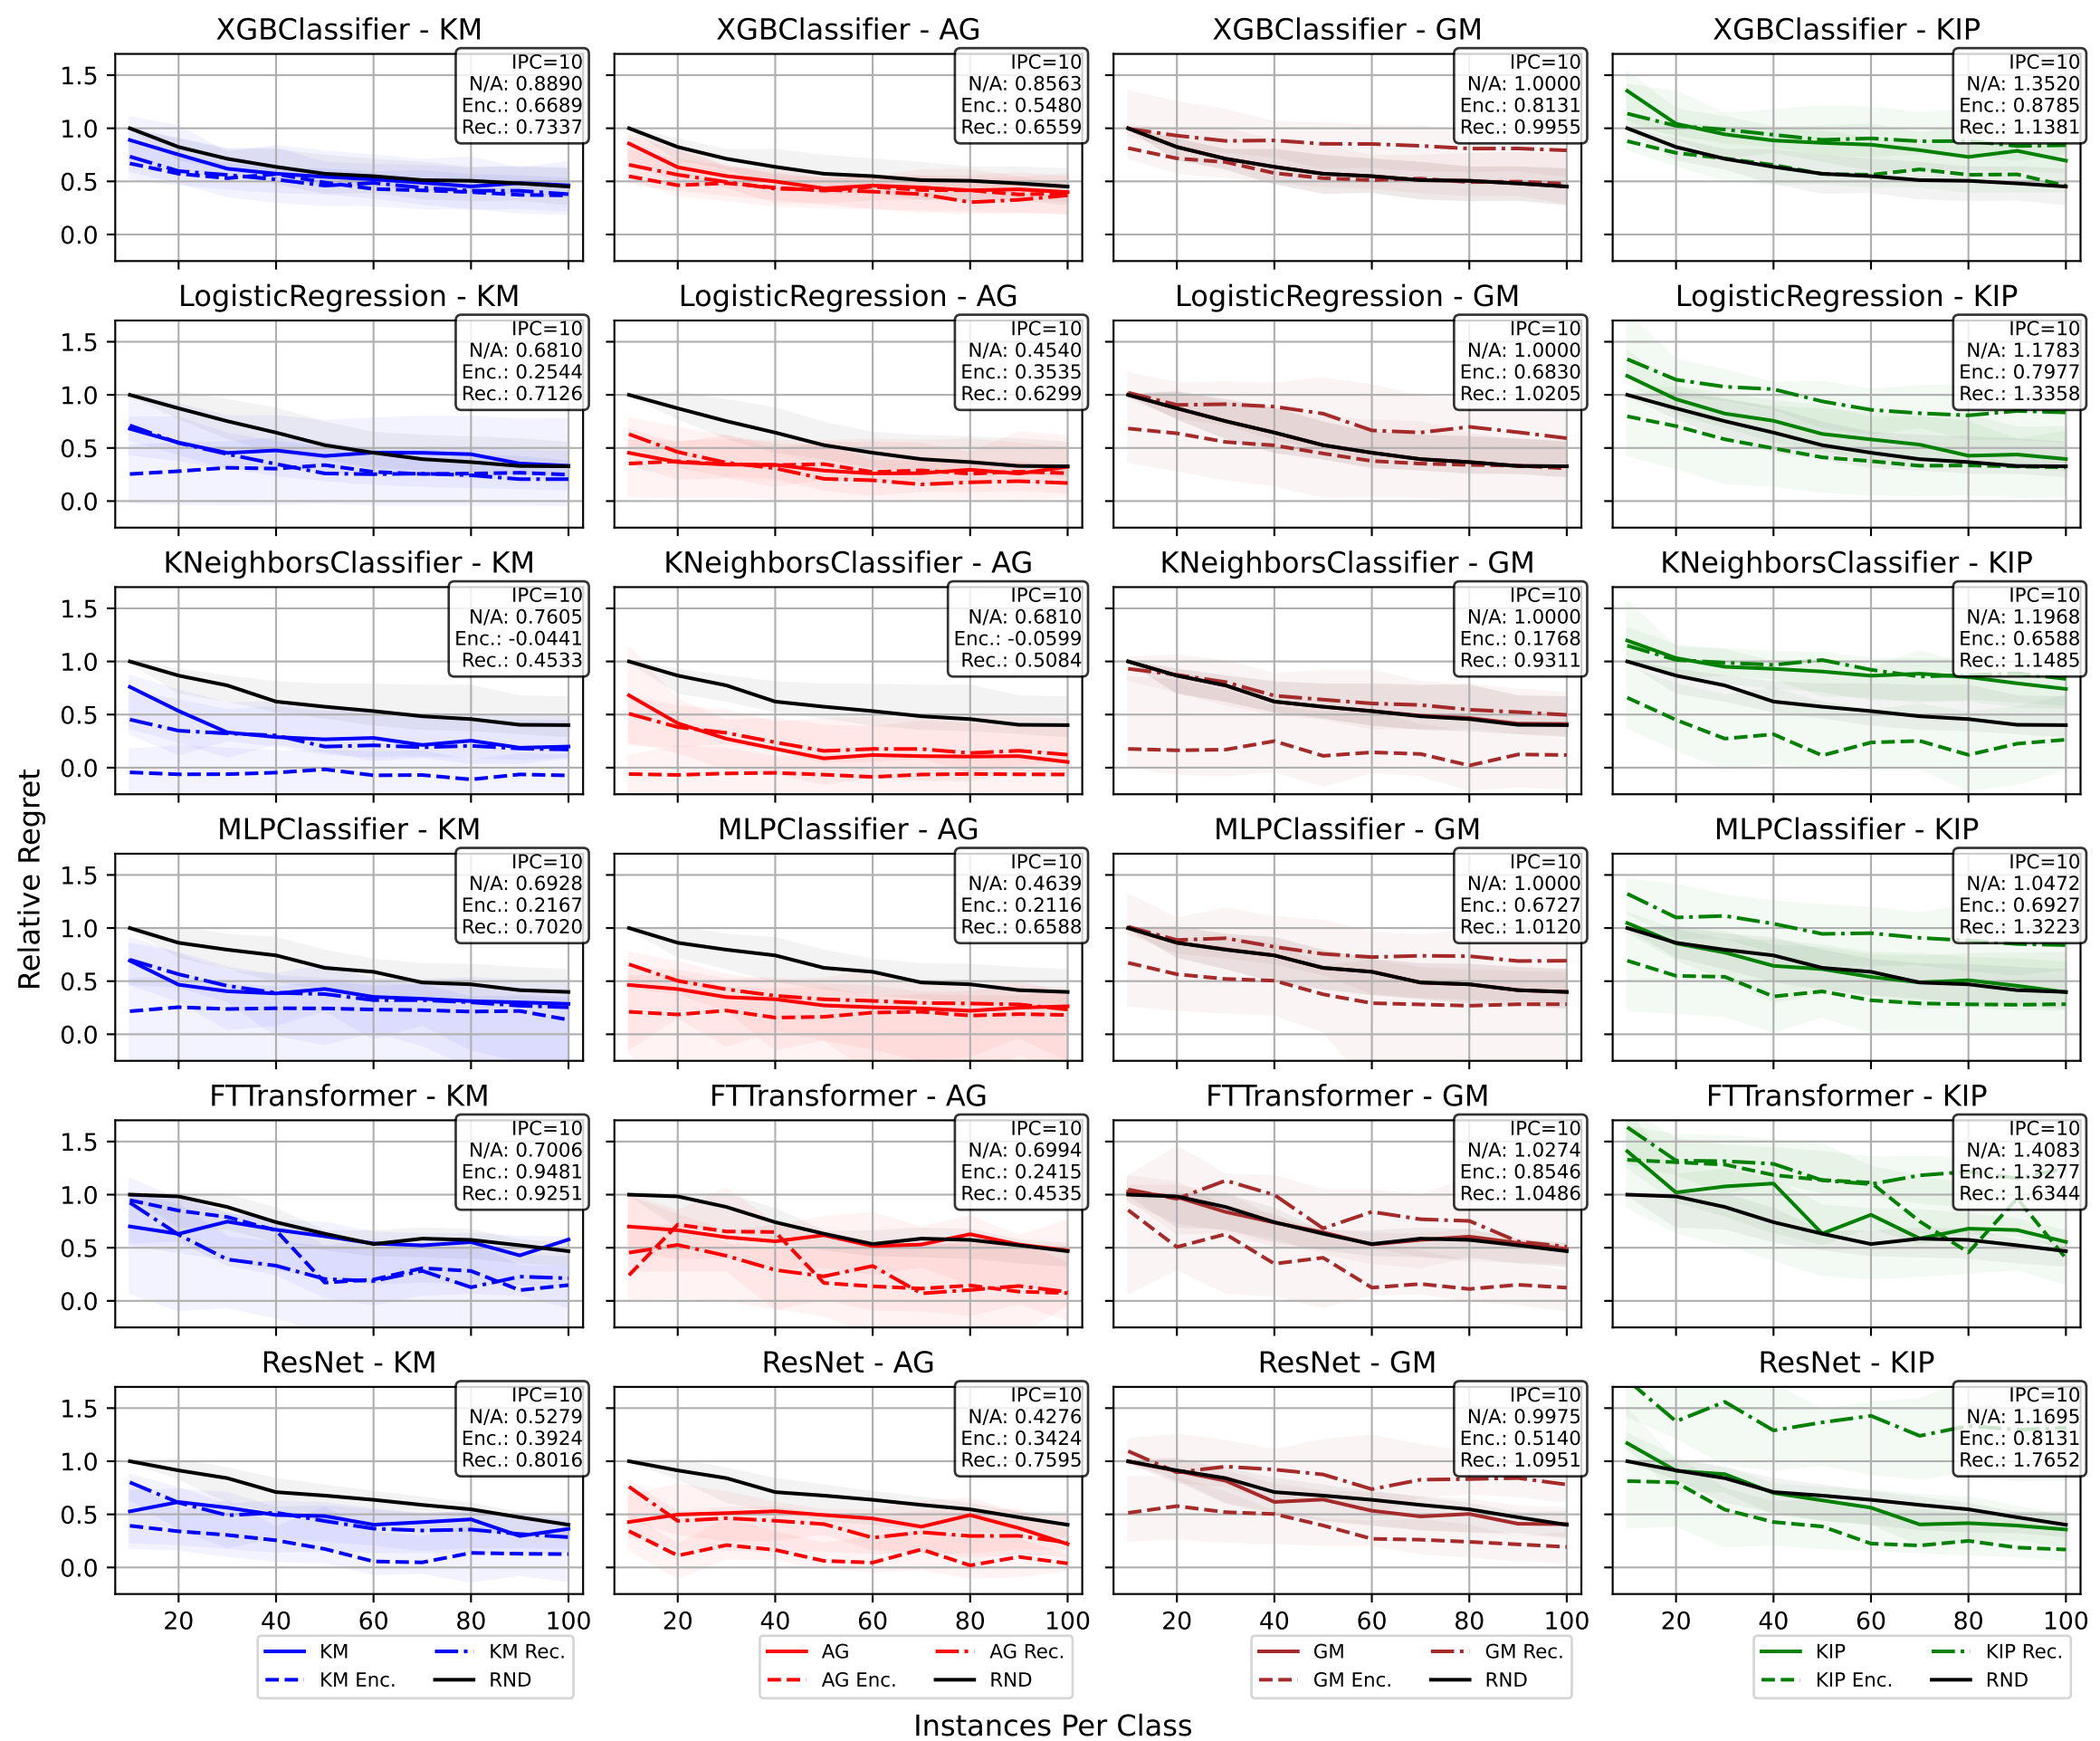

Supplement: supplementary_material [file attachment]

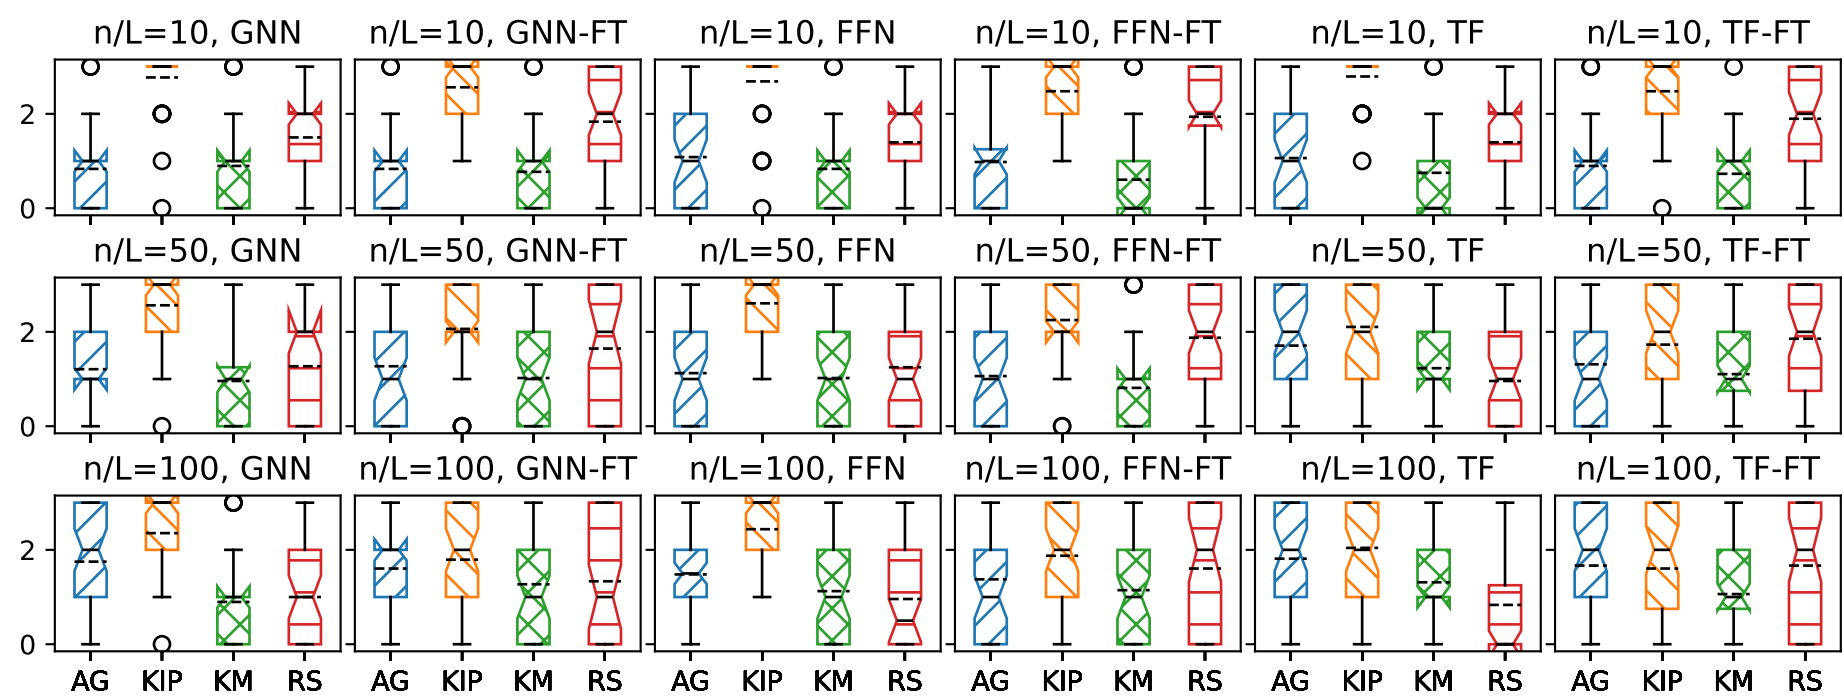

Supplement: supplementary_material [file attachment]

Overall

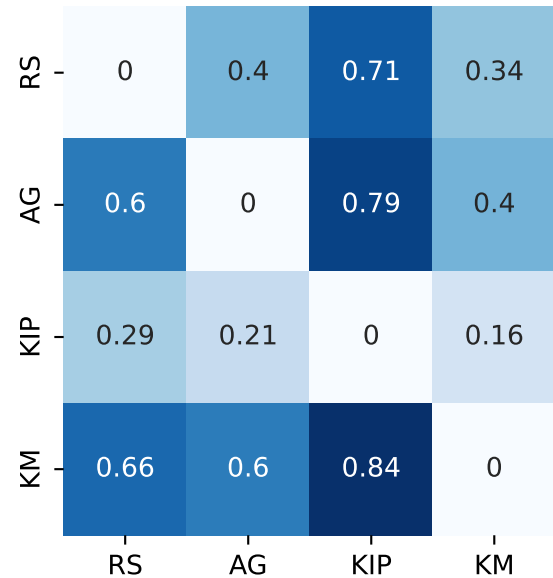

XGBoost

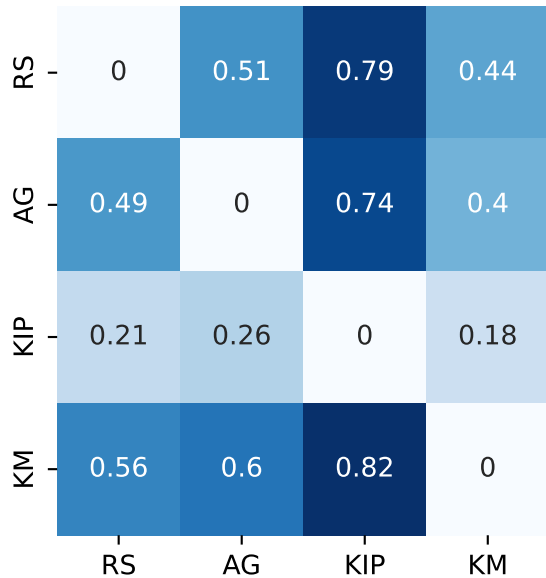

MLP

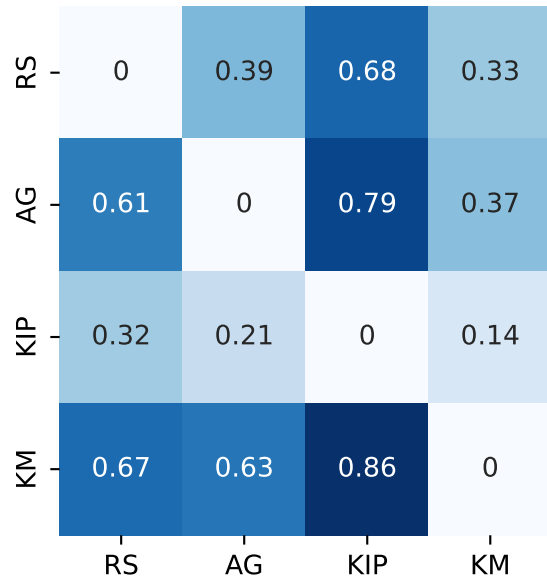

Supplement: supplementary_material [file attachment]

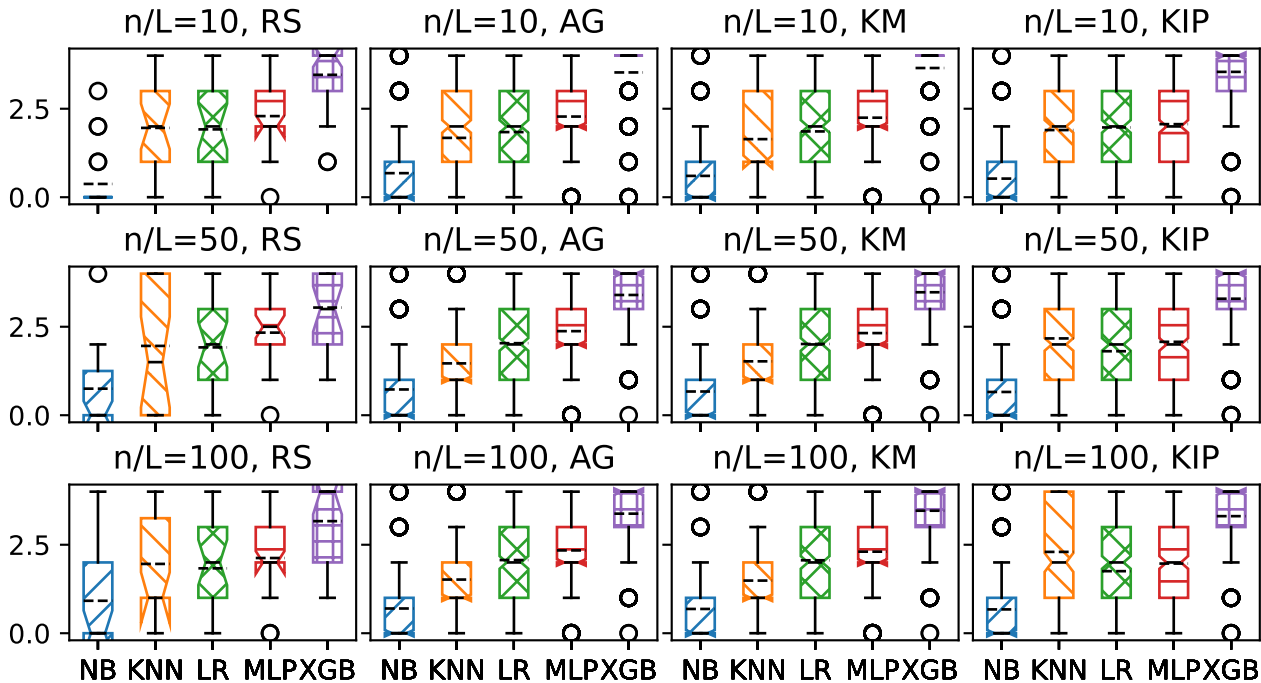

Supplement: supplementary_material [file attachment]

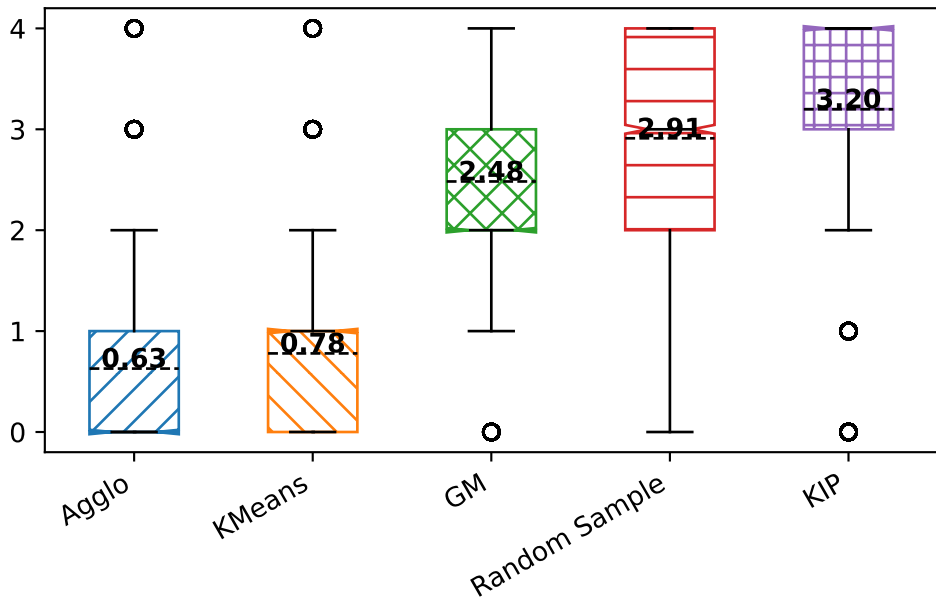

Supplement: supplementary_material [file attachment]

N=20

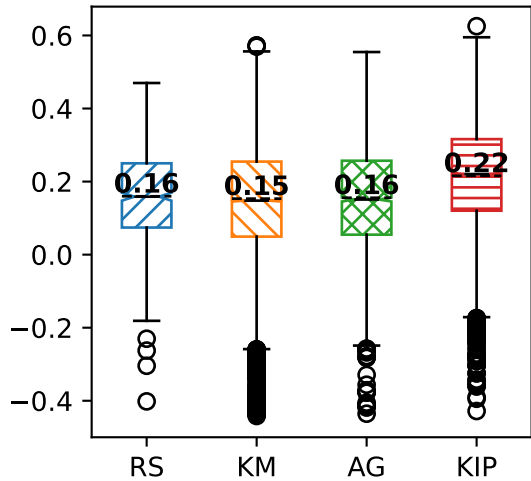

N=100

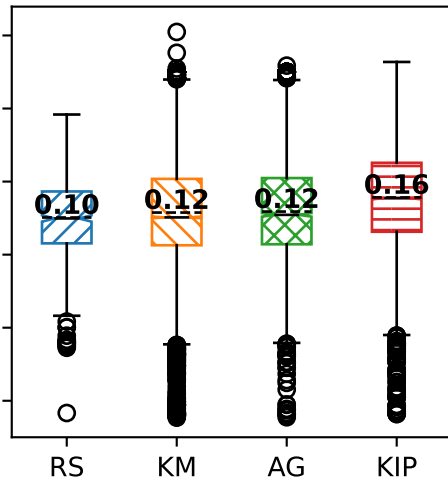

N=200

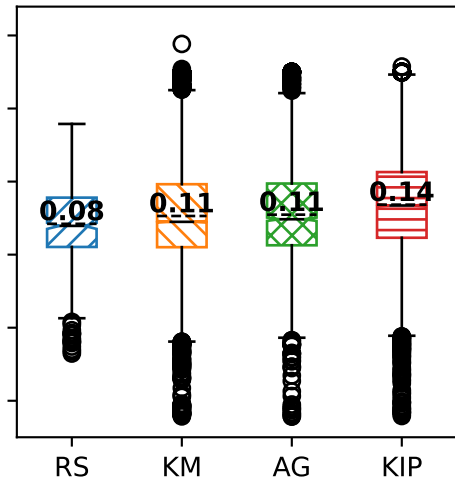

Supplement: supplementary_material [file attachment]

TwoDPlanes

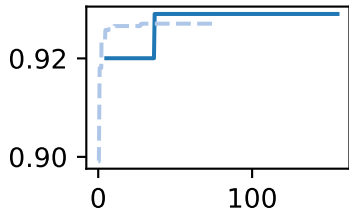

Credit

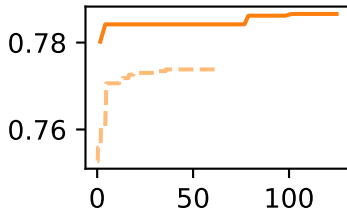

Adult

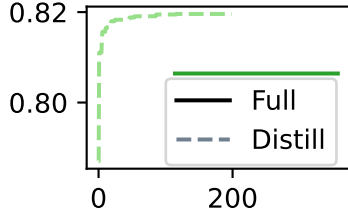

House

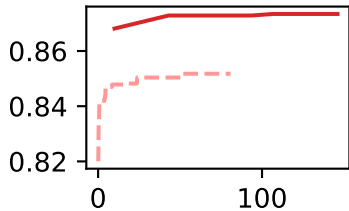

Pol

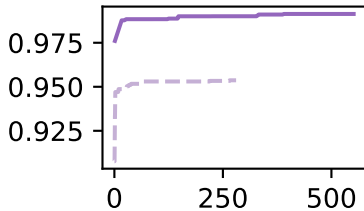

MiniBooNE

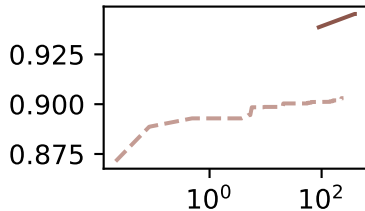

Balanced Accuracy

Time (s)

Supplement: supplementary_material [file attachment]

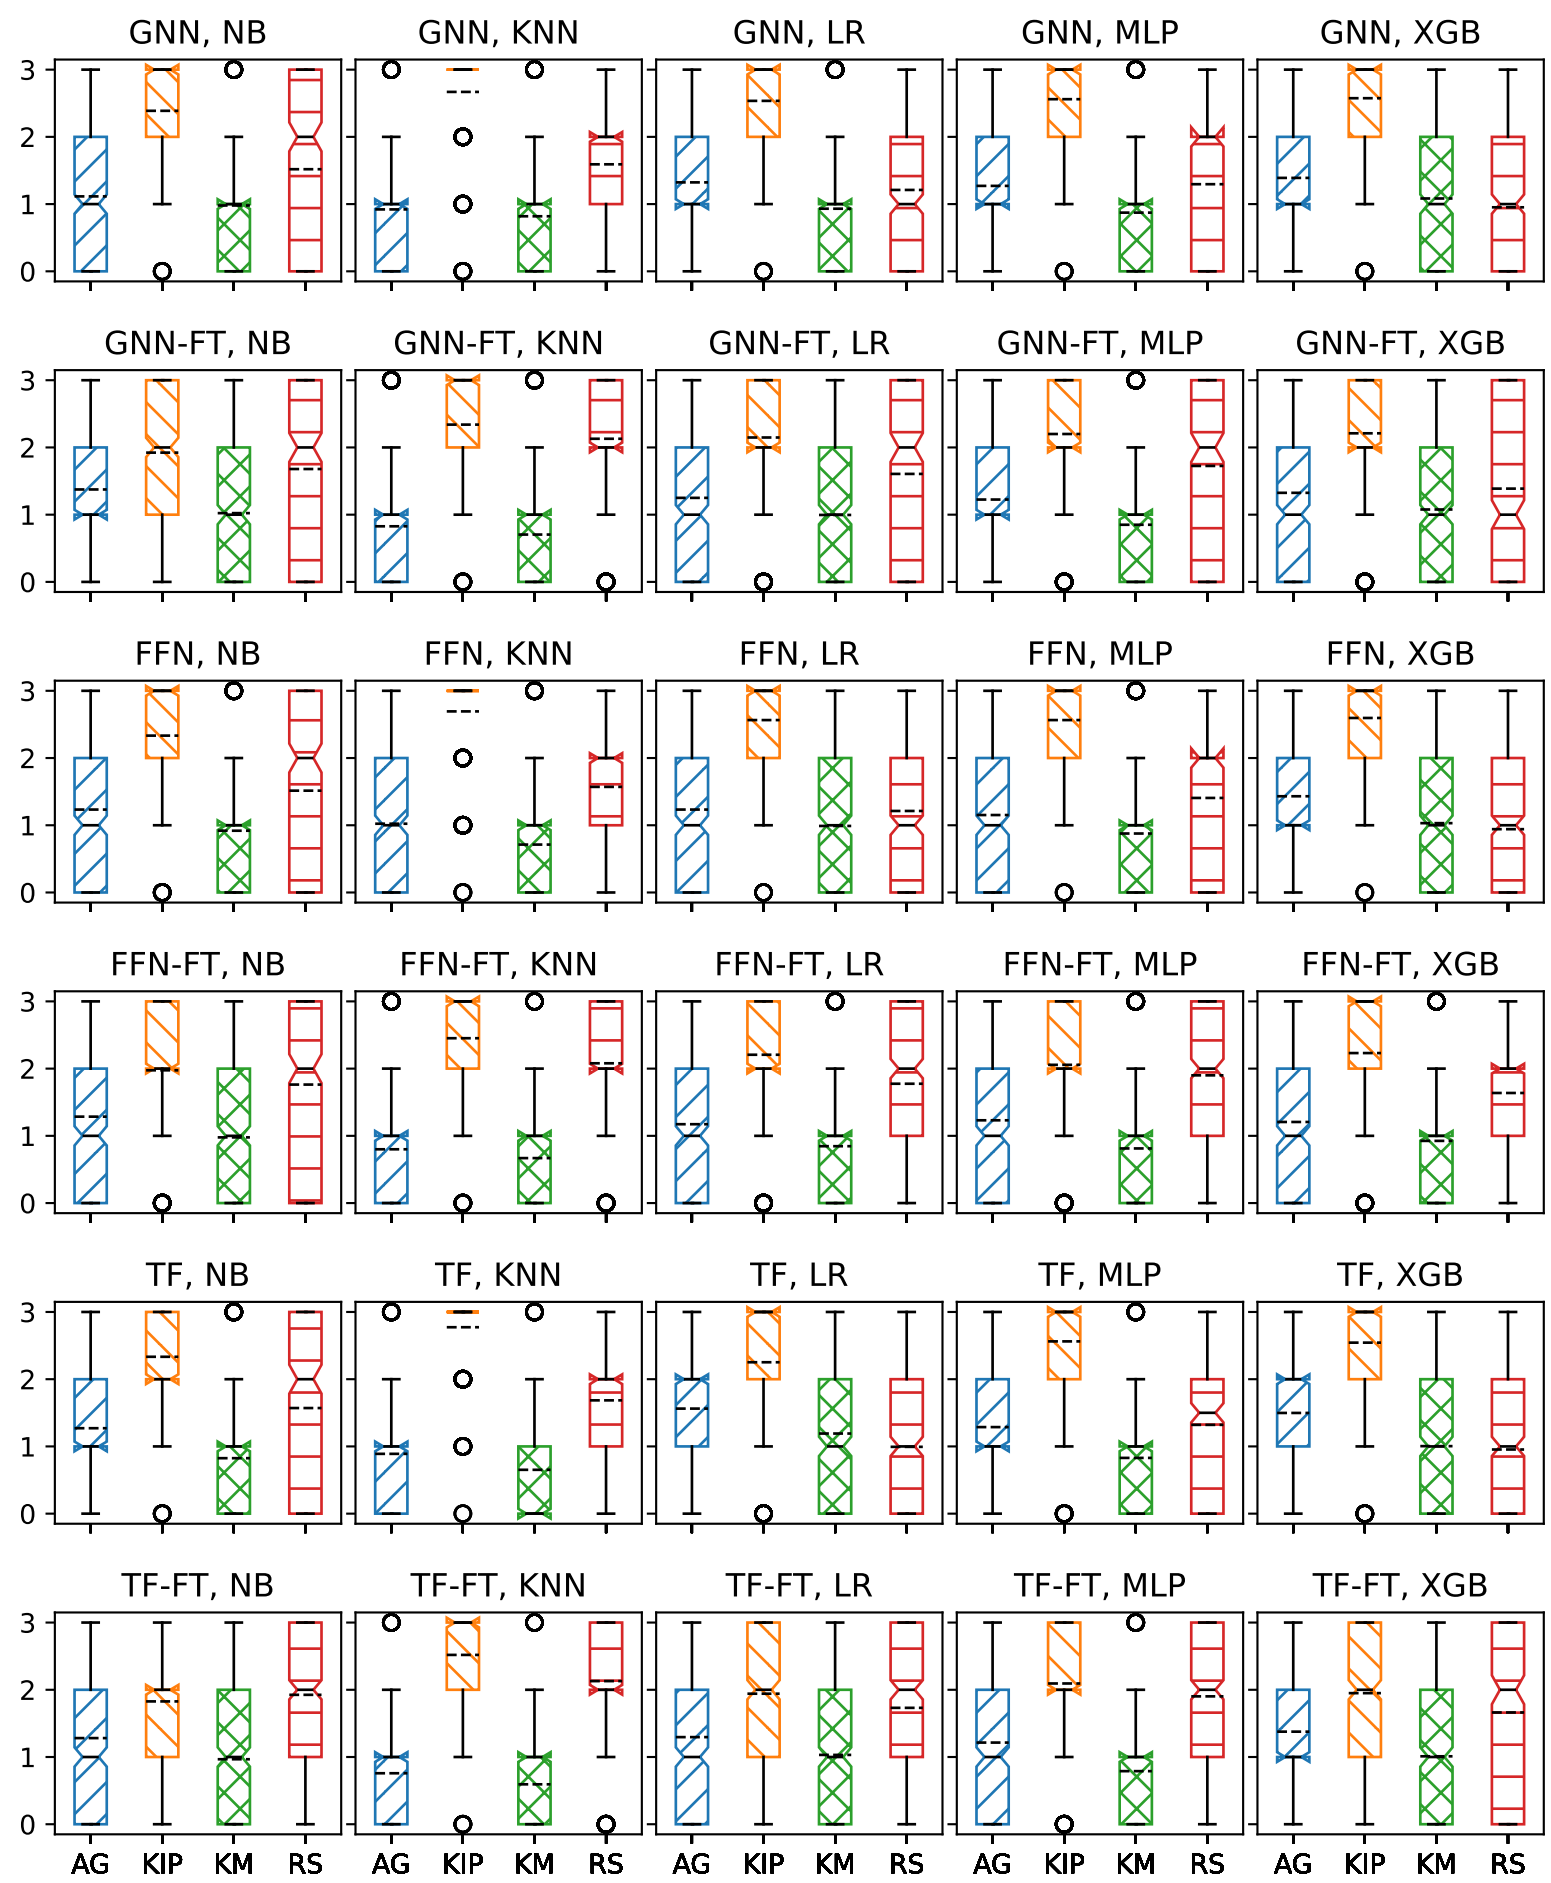

Supplement: supplementary_material [file attachment]

Original

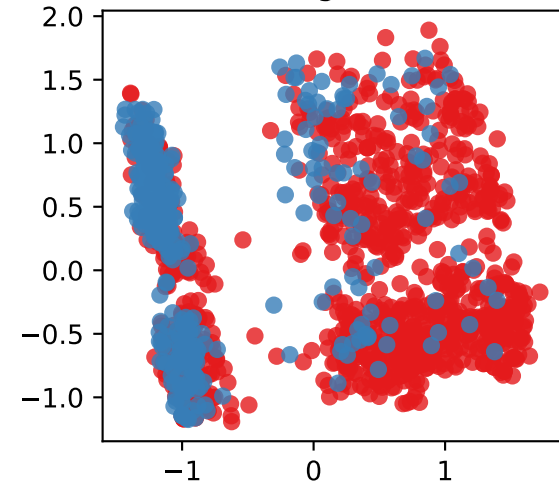

FFN Encoded

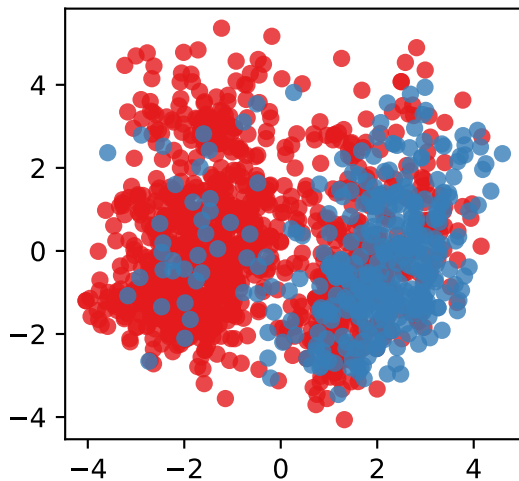

FFN-FT Encoded

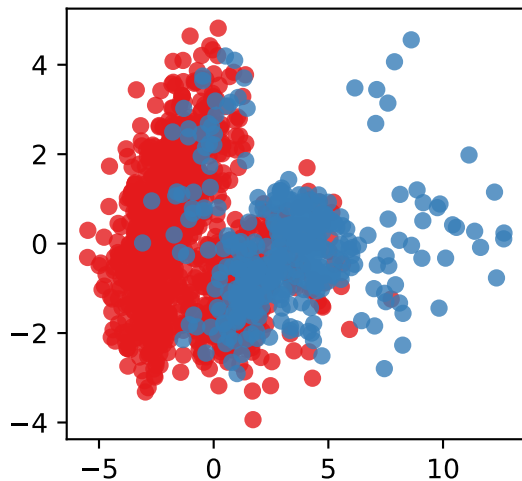

Supplement: supplementary_material [file attachment]

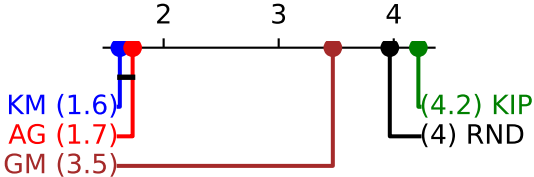

Supplement: supplementary_material [file attachment]

2

3

4

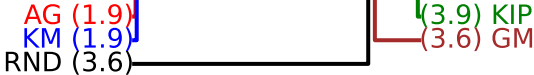

Supplement: supplementary_material [file attachment]

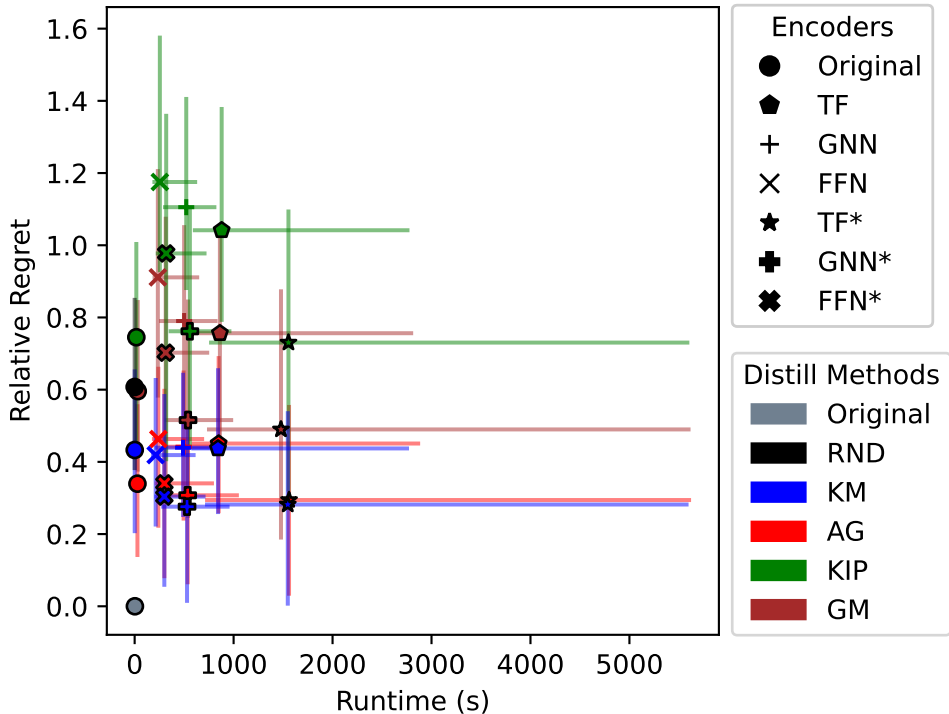

Supplement: supplementary_material [file attachment]

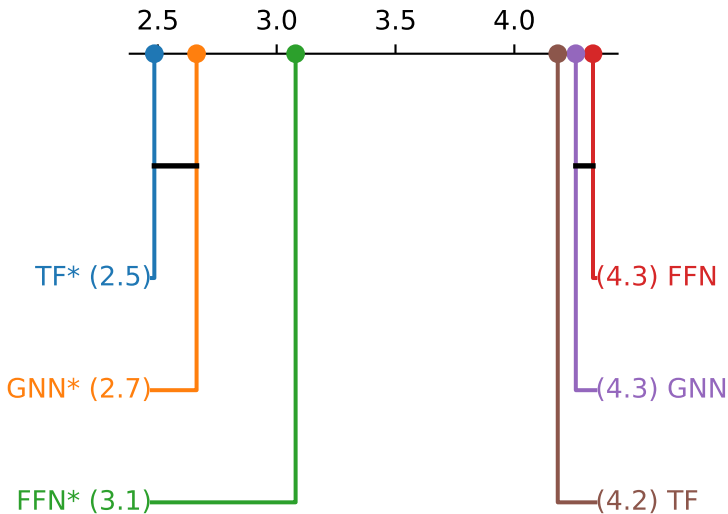

Supplement: supplementary_material [file attachment]

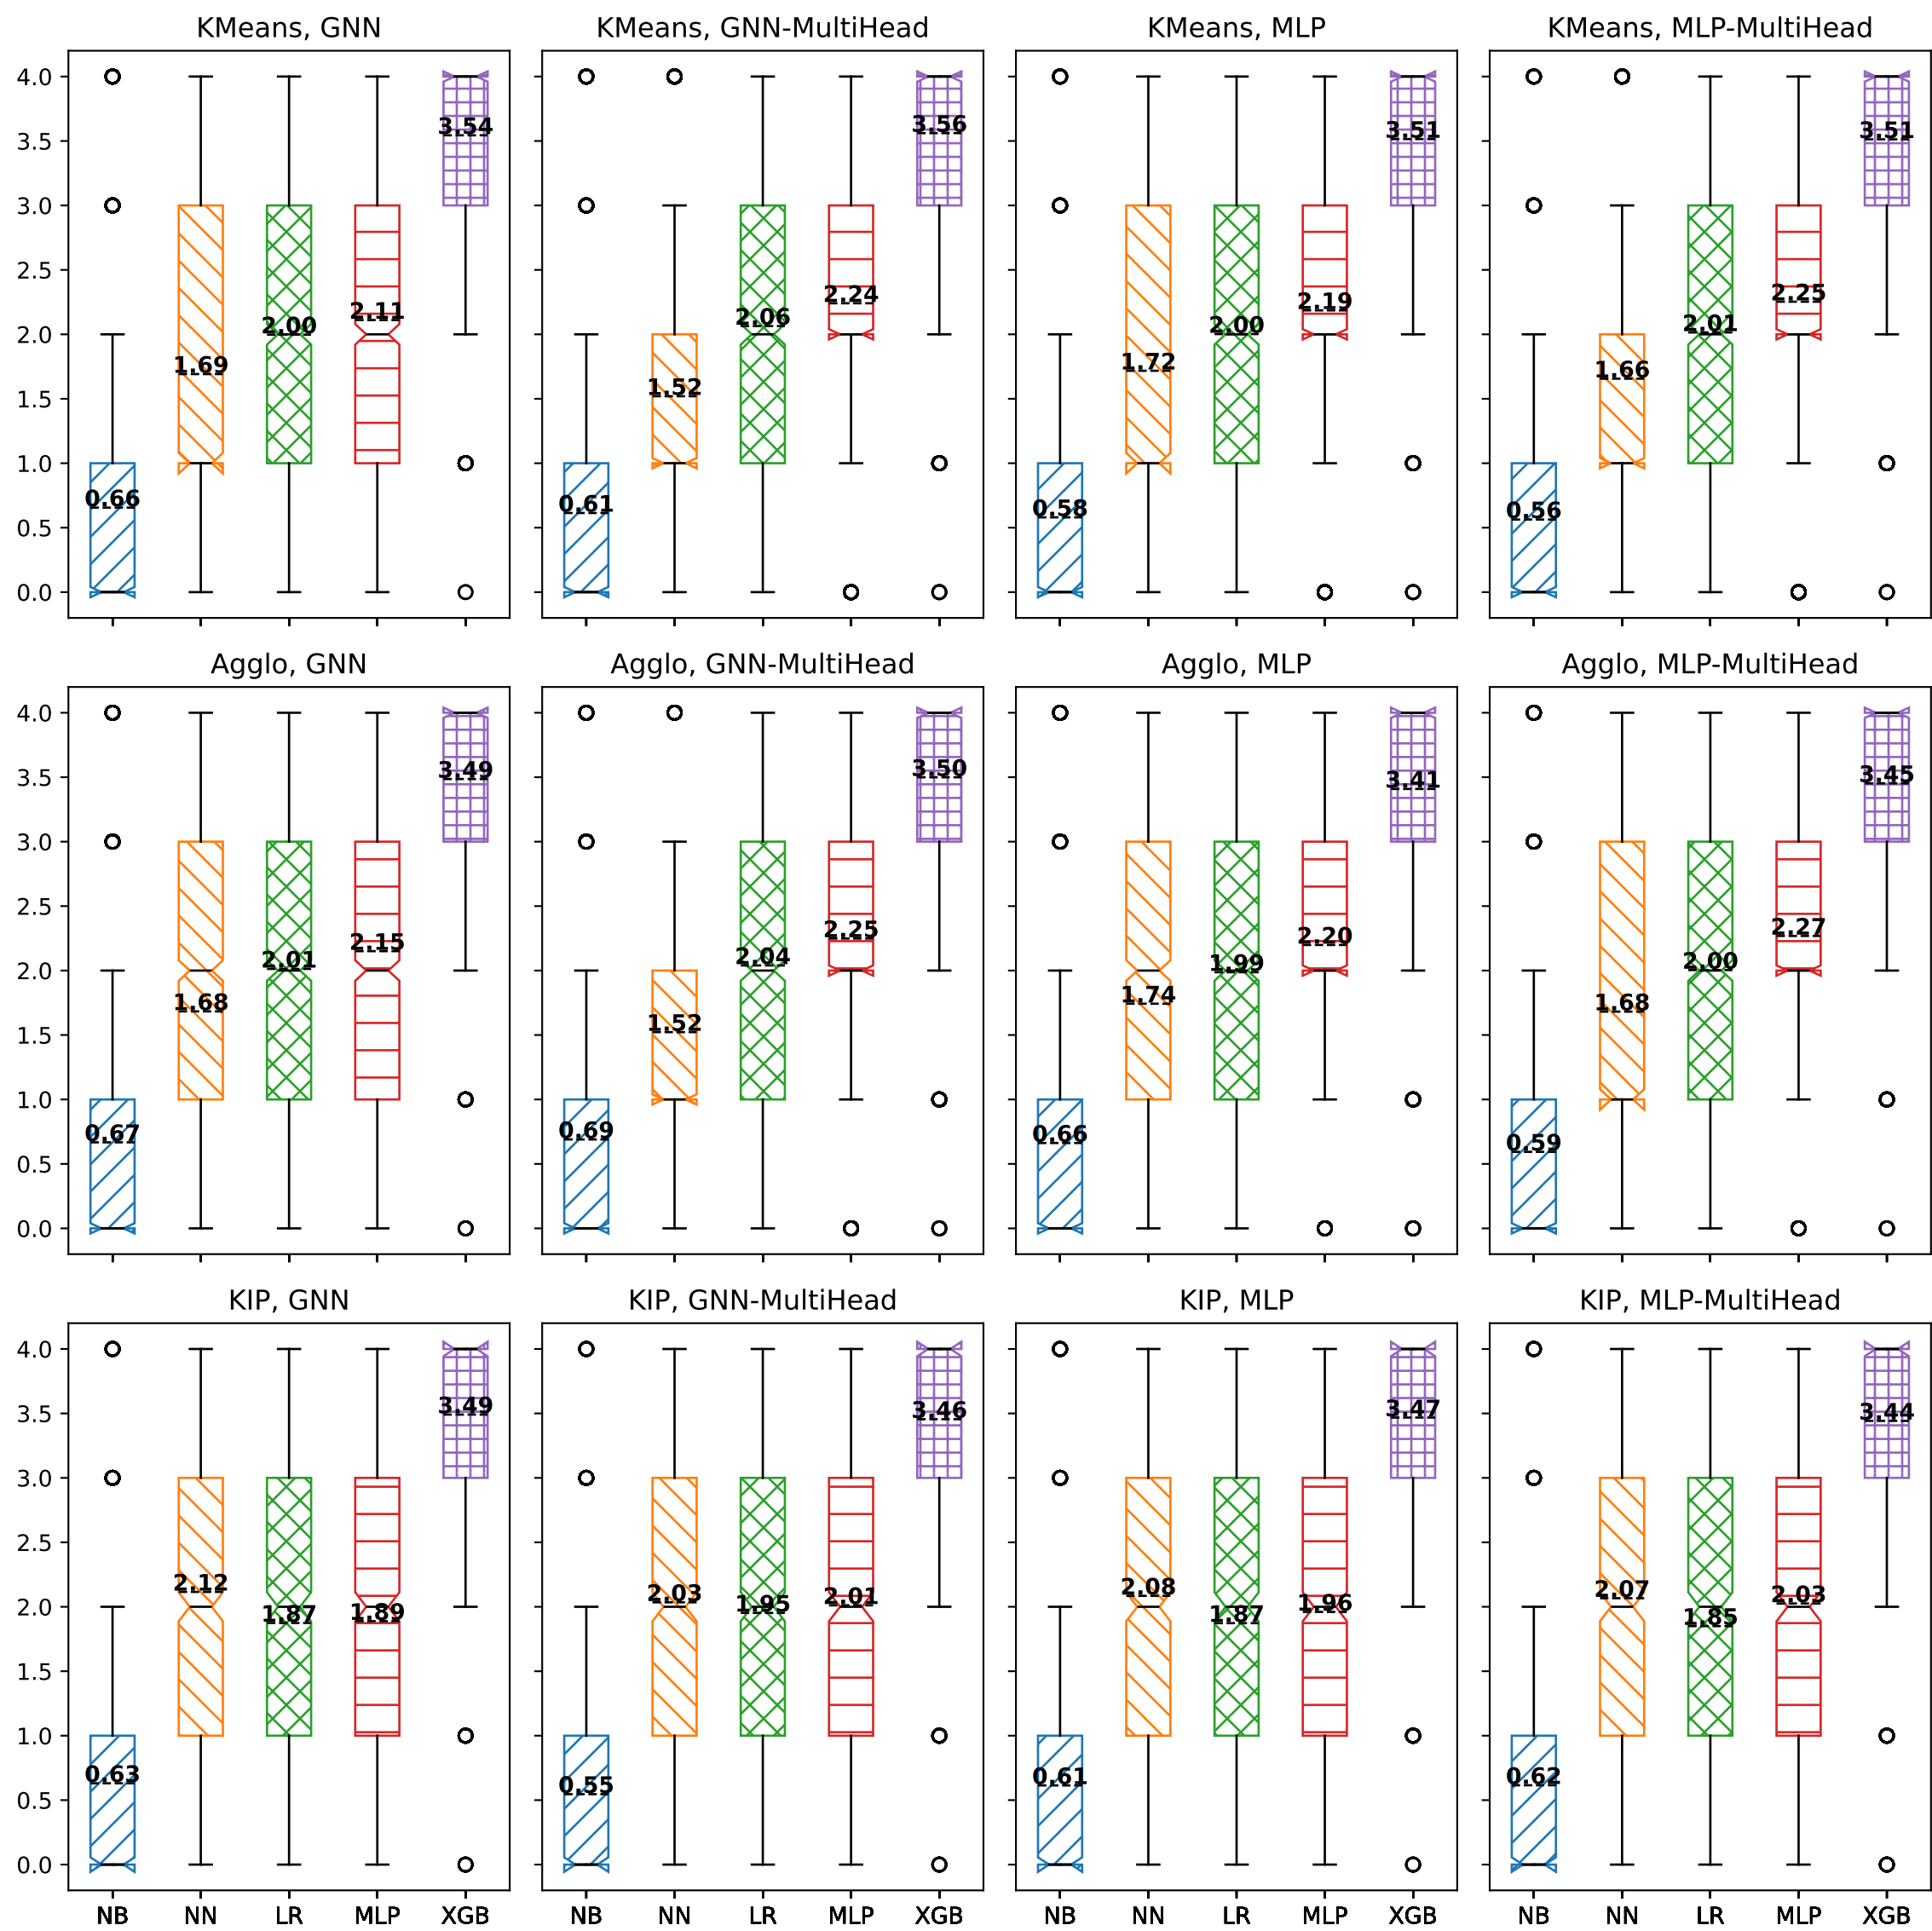

Supplement: supplementary_material [file attachment]

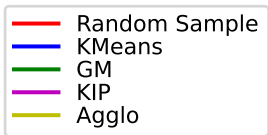

Overall  
Score

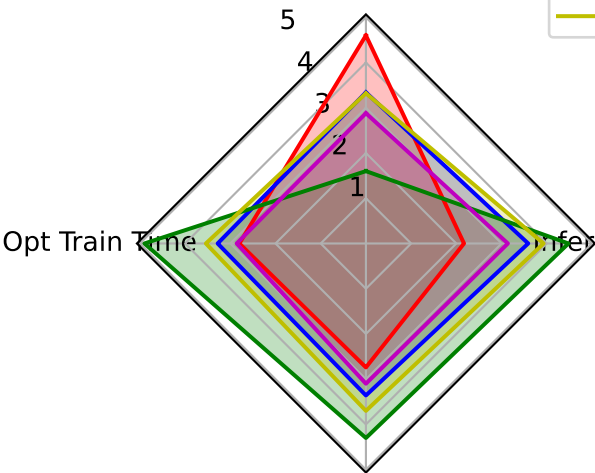

FFN  
Score

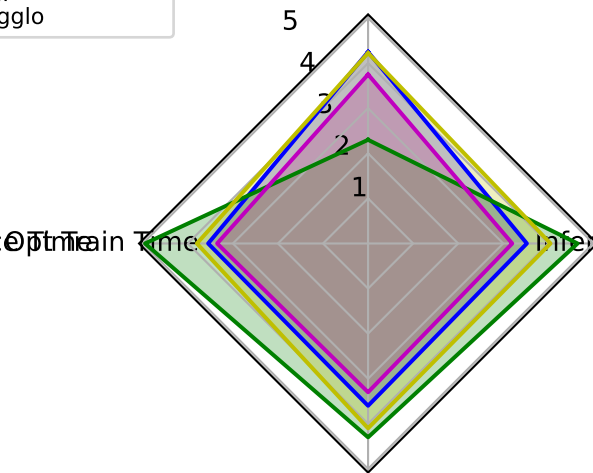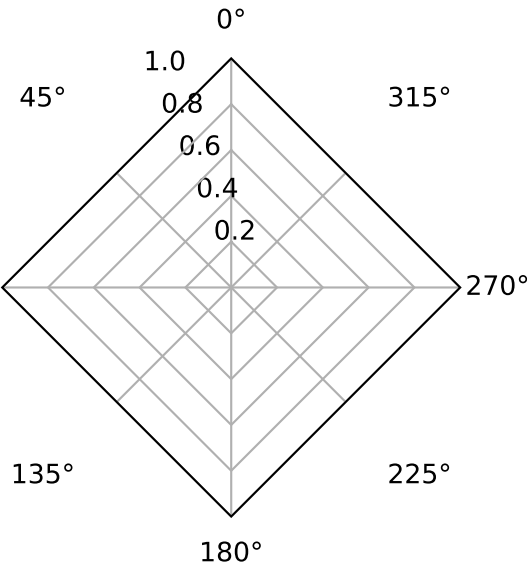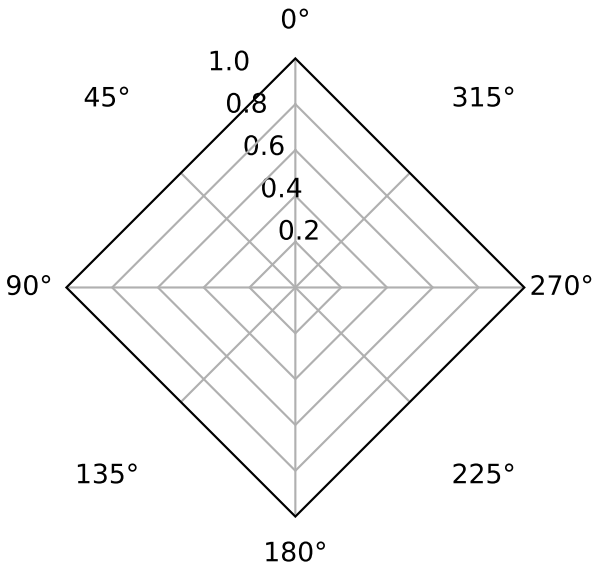

No Encoder  
Score

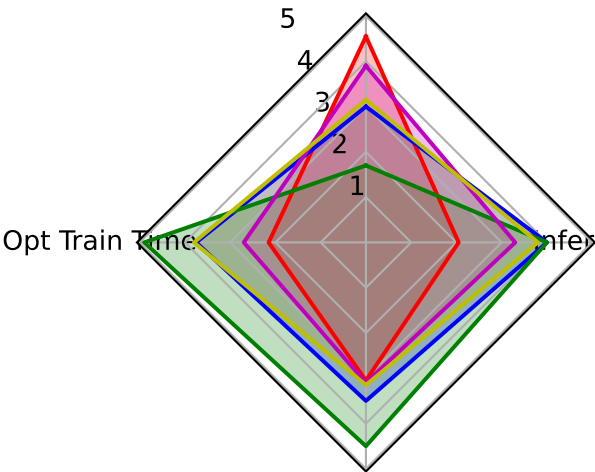

FFN FT  
Score

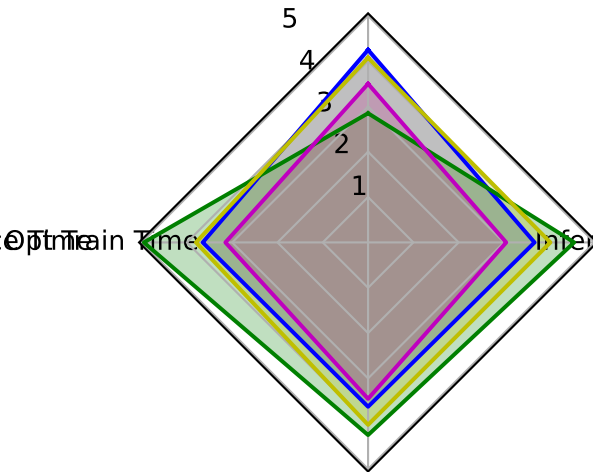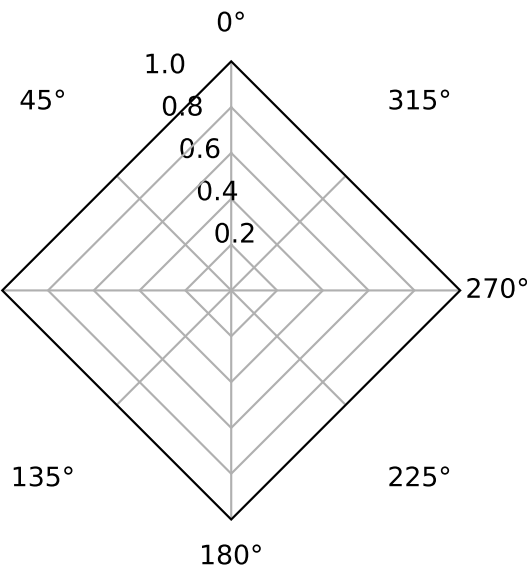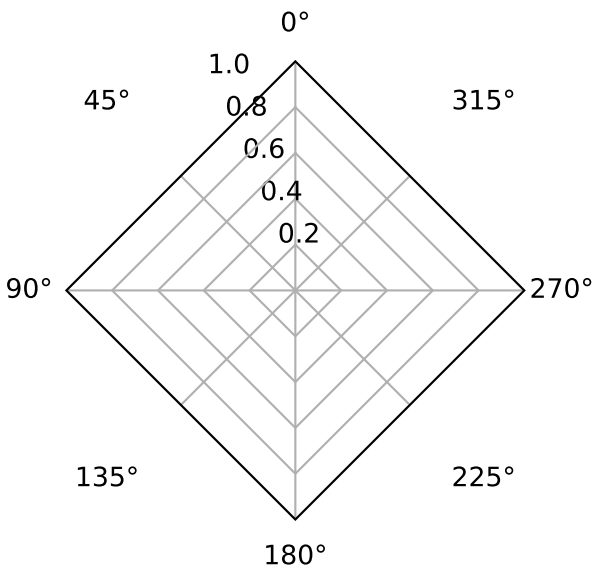

Supplement: supplementary_material [file attachment]

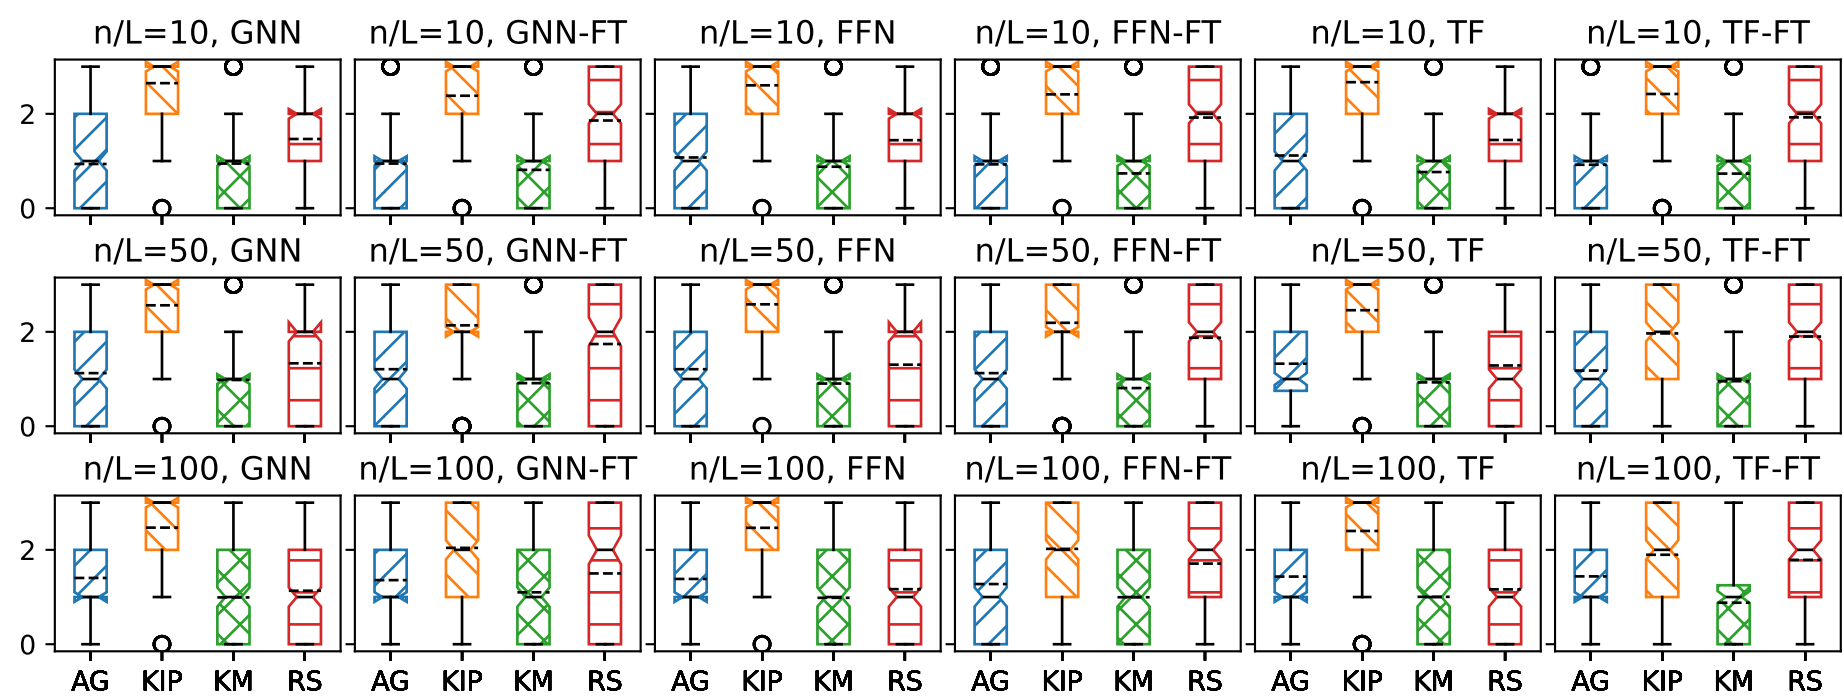

Supplement: supplementary_material [file attachment]

MLP

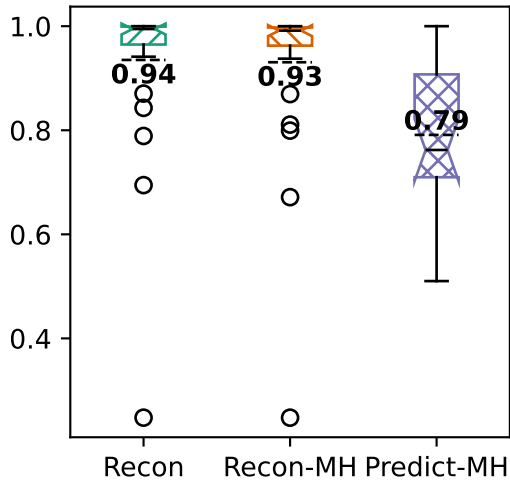

GNN

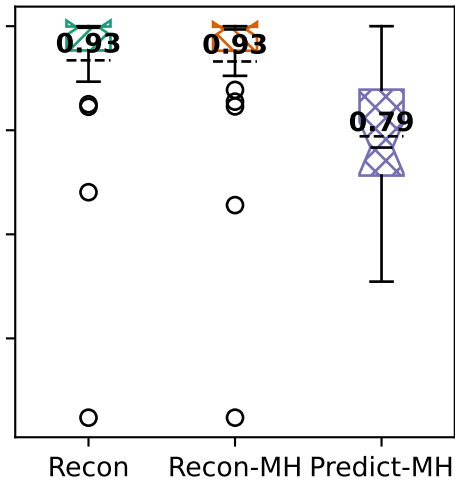

Supplement: supplementary_material [file attachment]

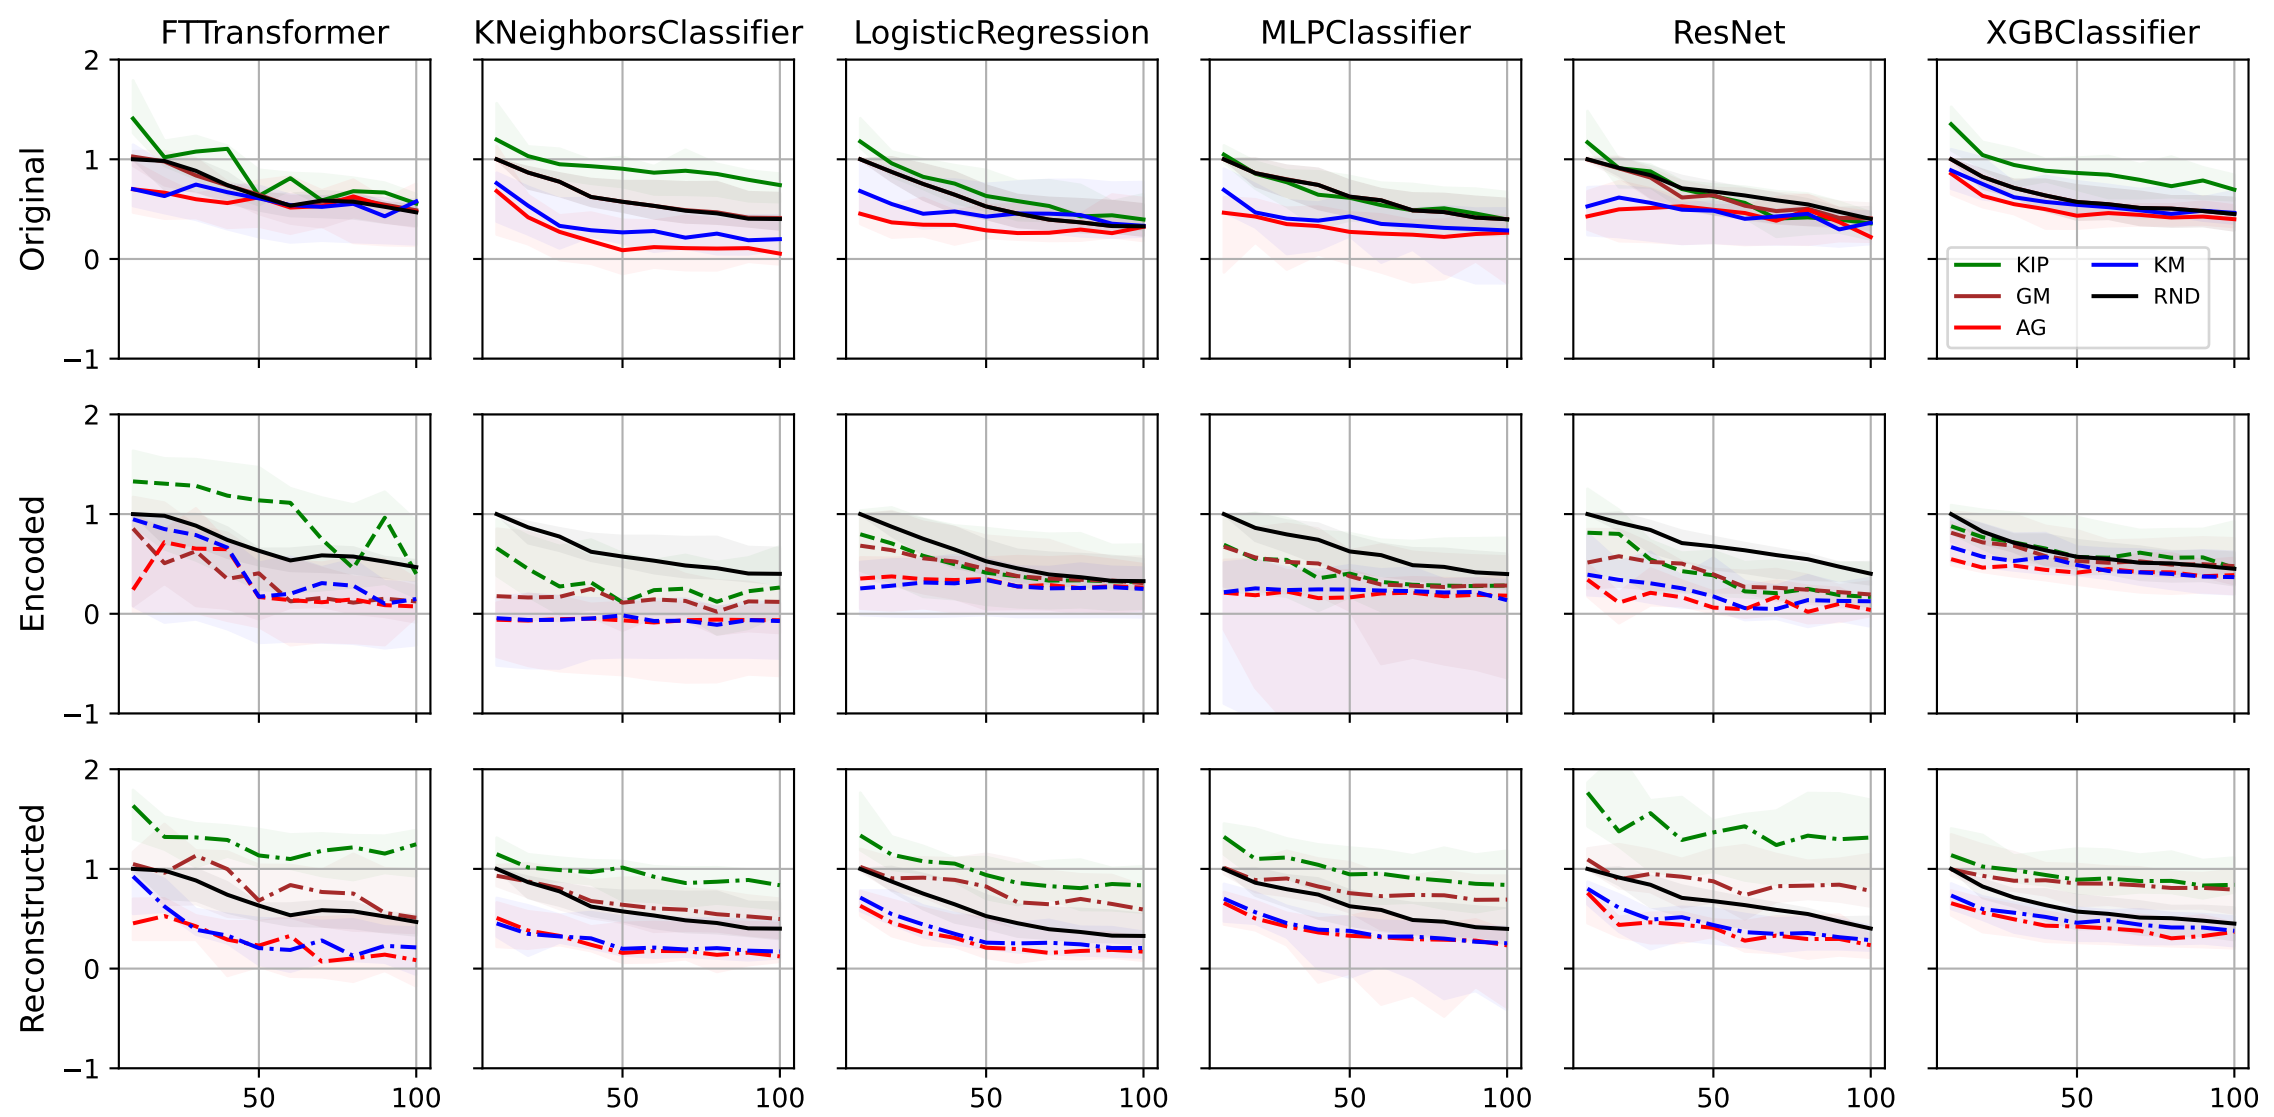

Supplement: supplementary_material [file attachment]

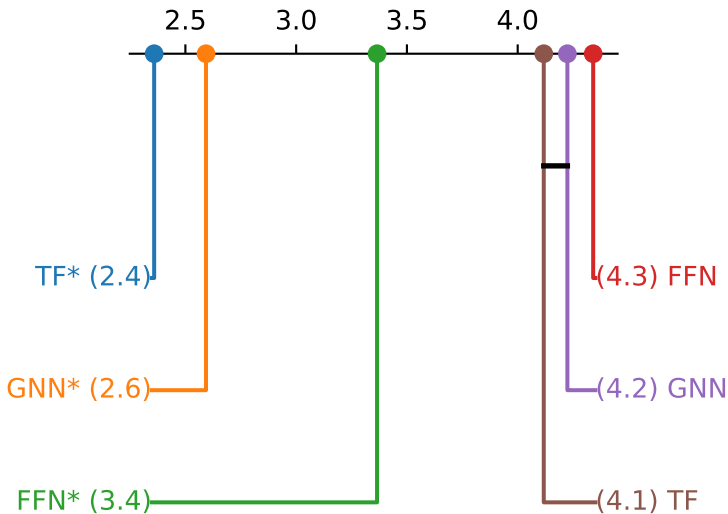

Supplement: supplementary_material [file attachment]

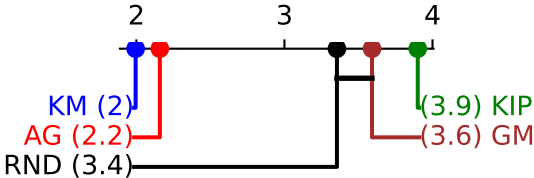

Supplement: supplementary_material [file attachment]

Relative Regret

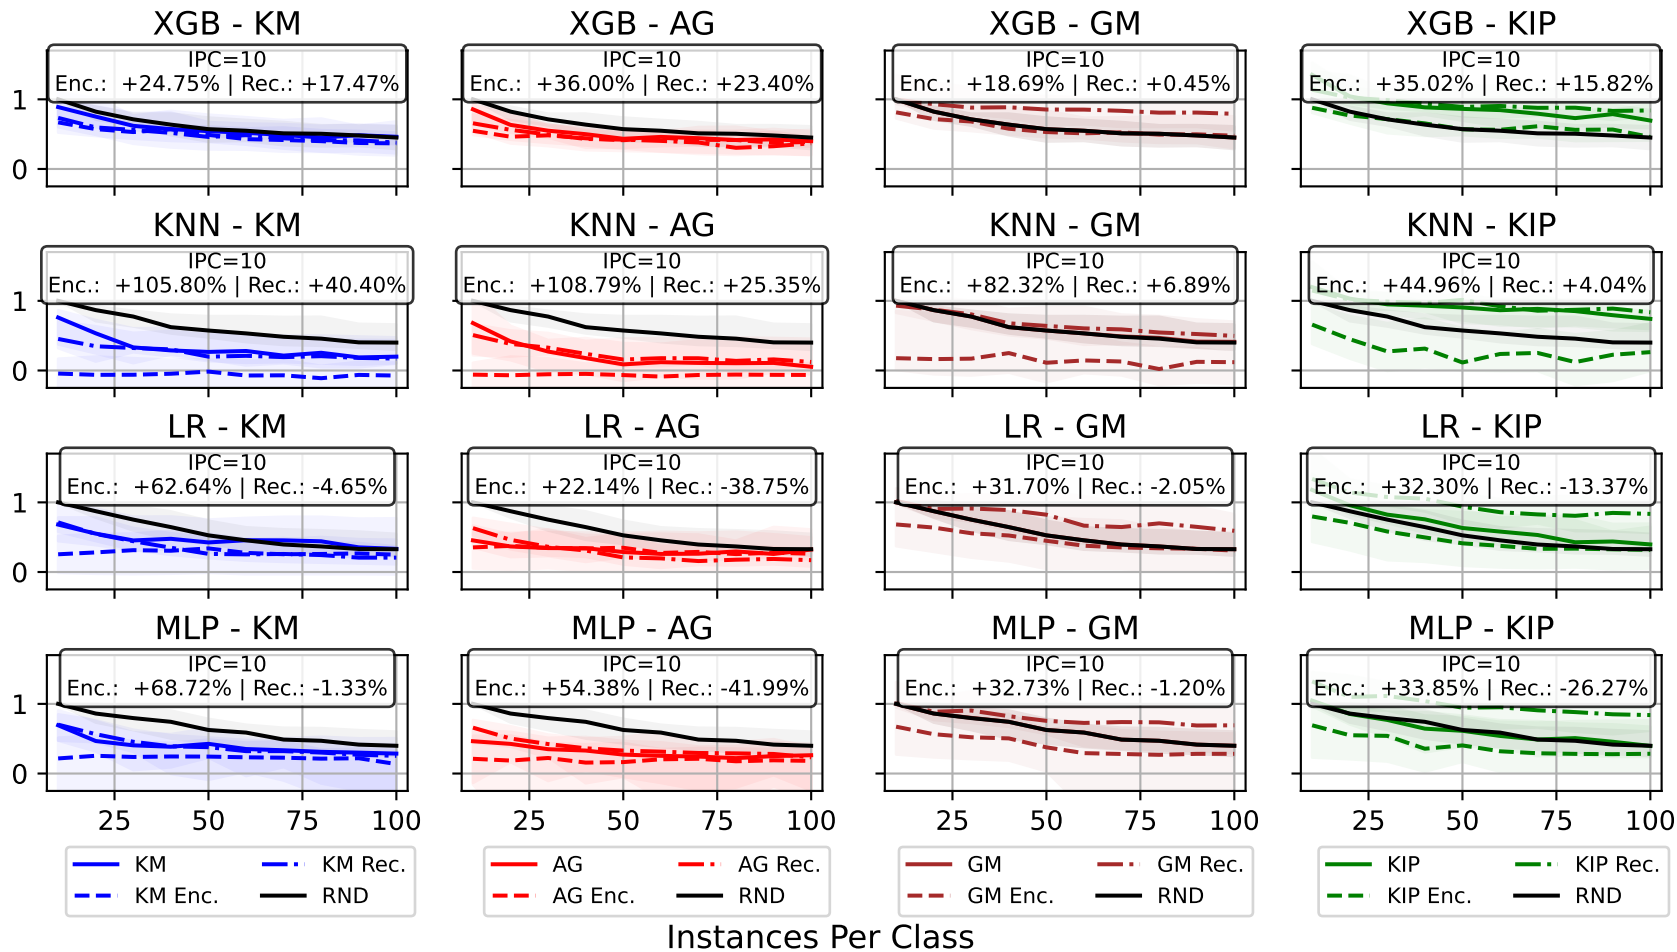

Supplement: supplementary_material [file attachment]

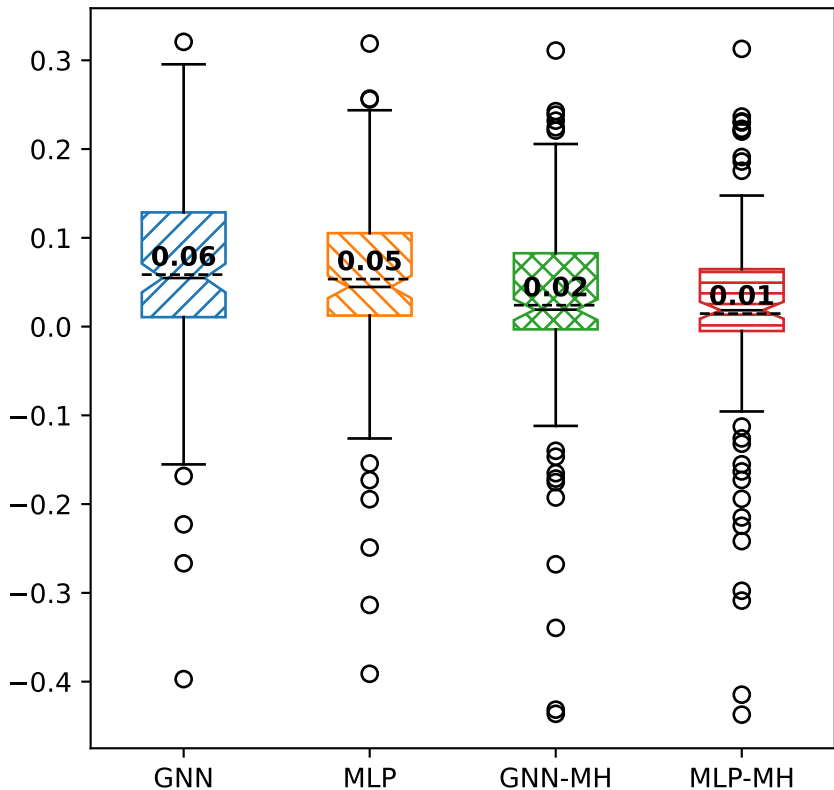

Supplement: supplementary_material [file attachment]

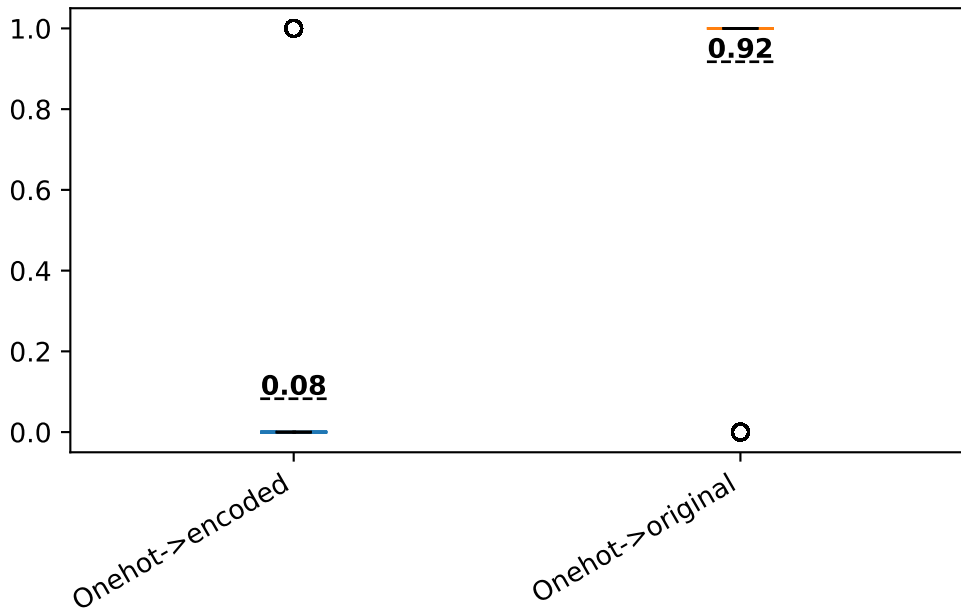

Supplement: supplementary_material [file attachment]

KMeans, N=10

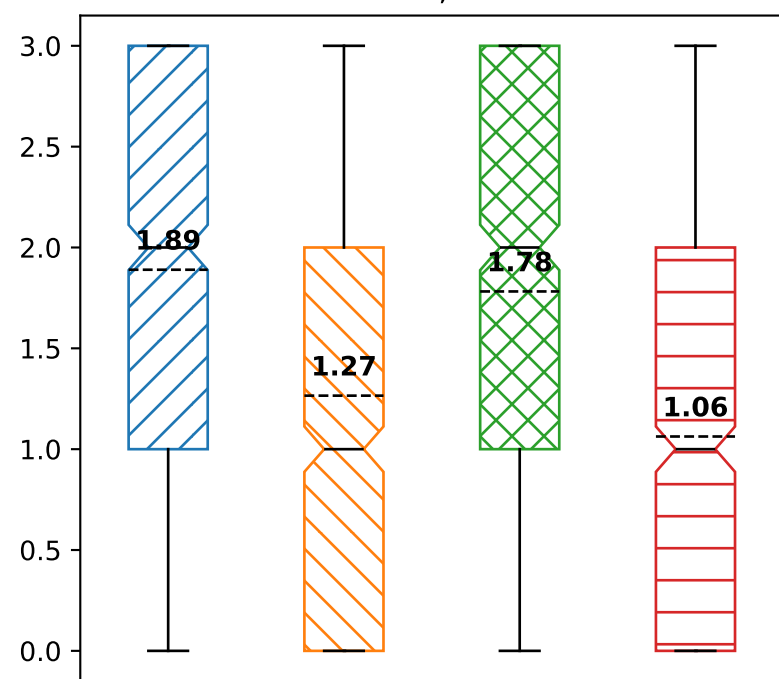

KMeans, N=50

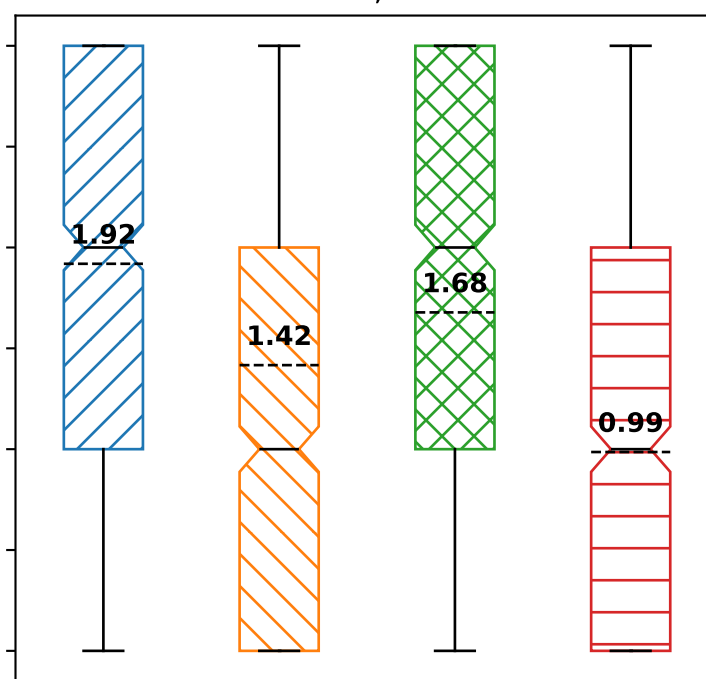

KMeans, N=100

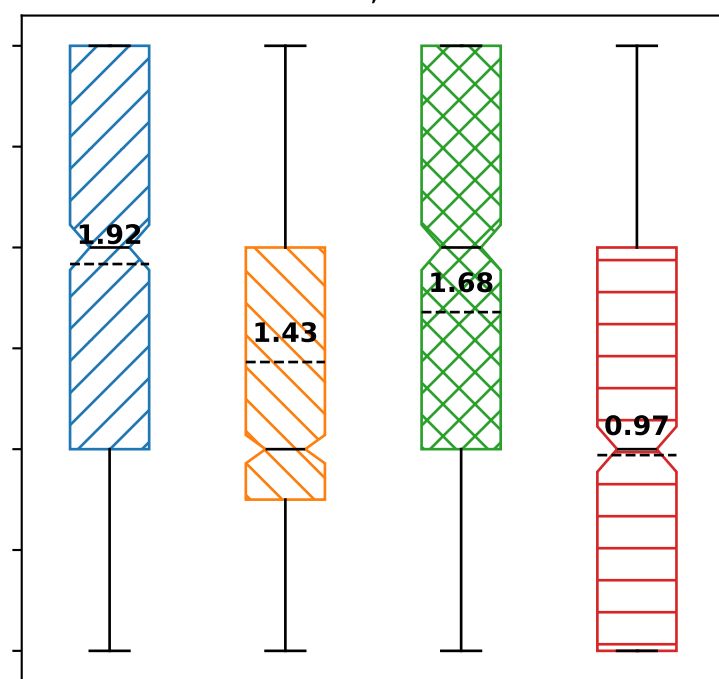

Agglo, N=10

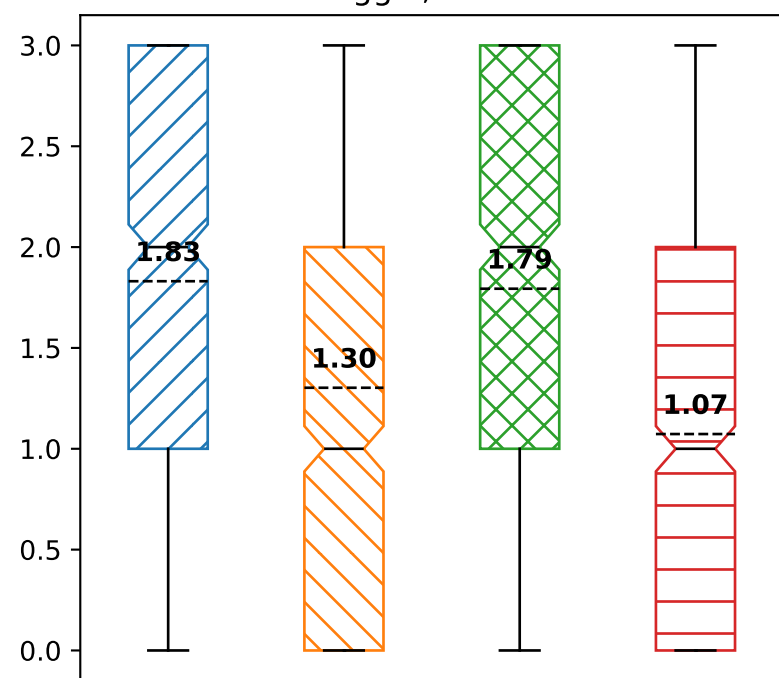

Agglo, N=50

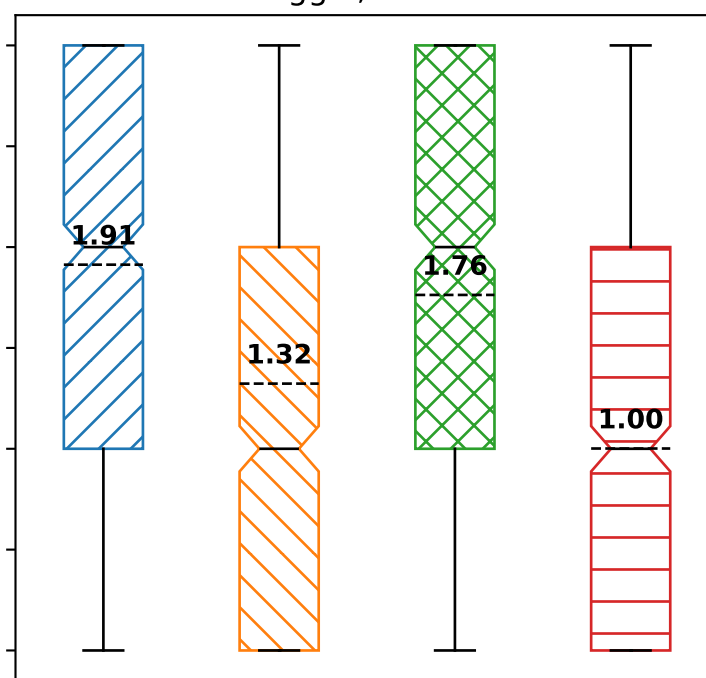

Agglo, N=100

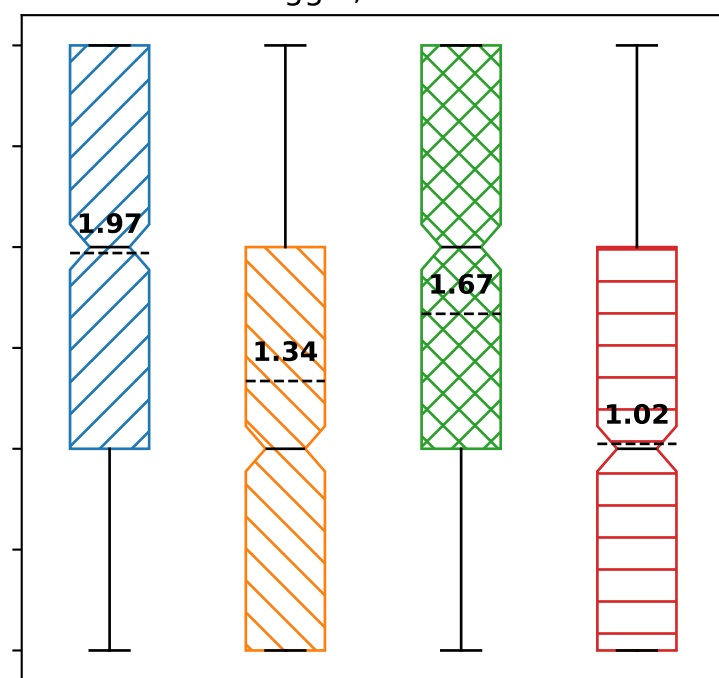

KIP, N=10

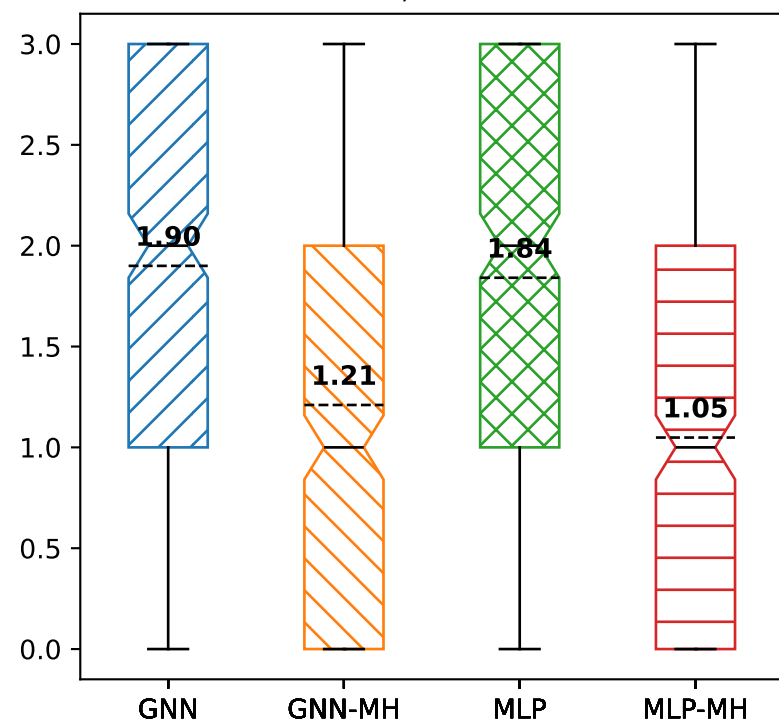

KIP, N=50

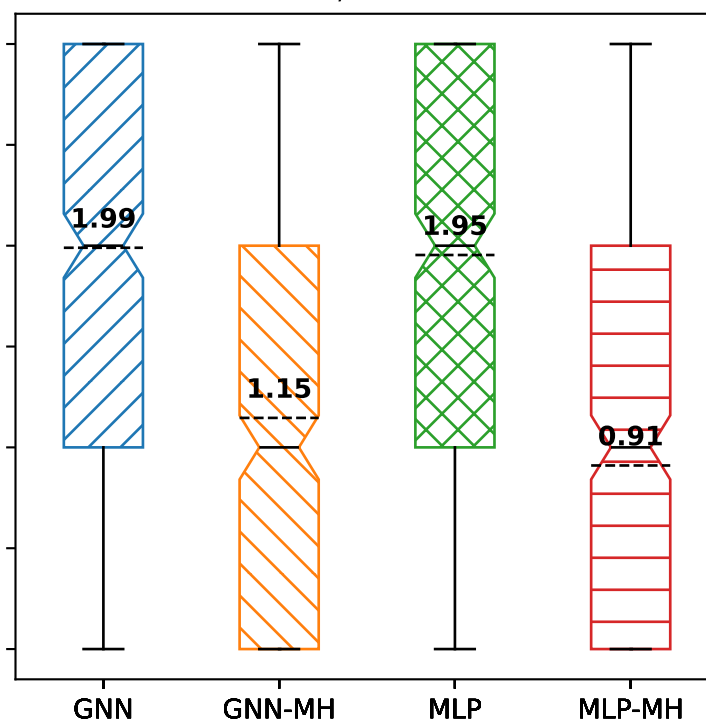

KIP, N=100

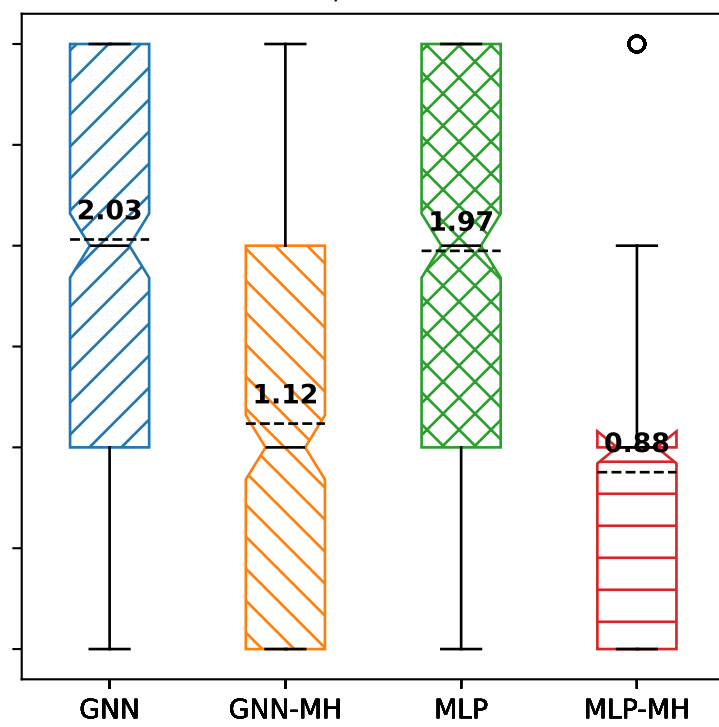

Supplement: supplementary_material [file attachment]

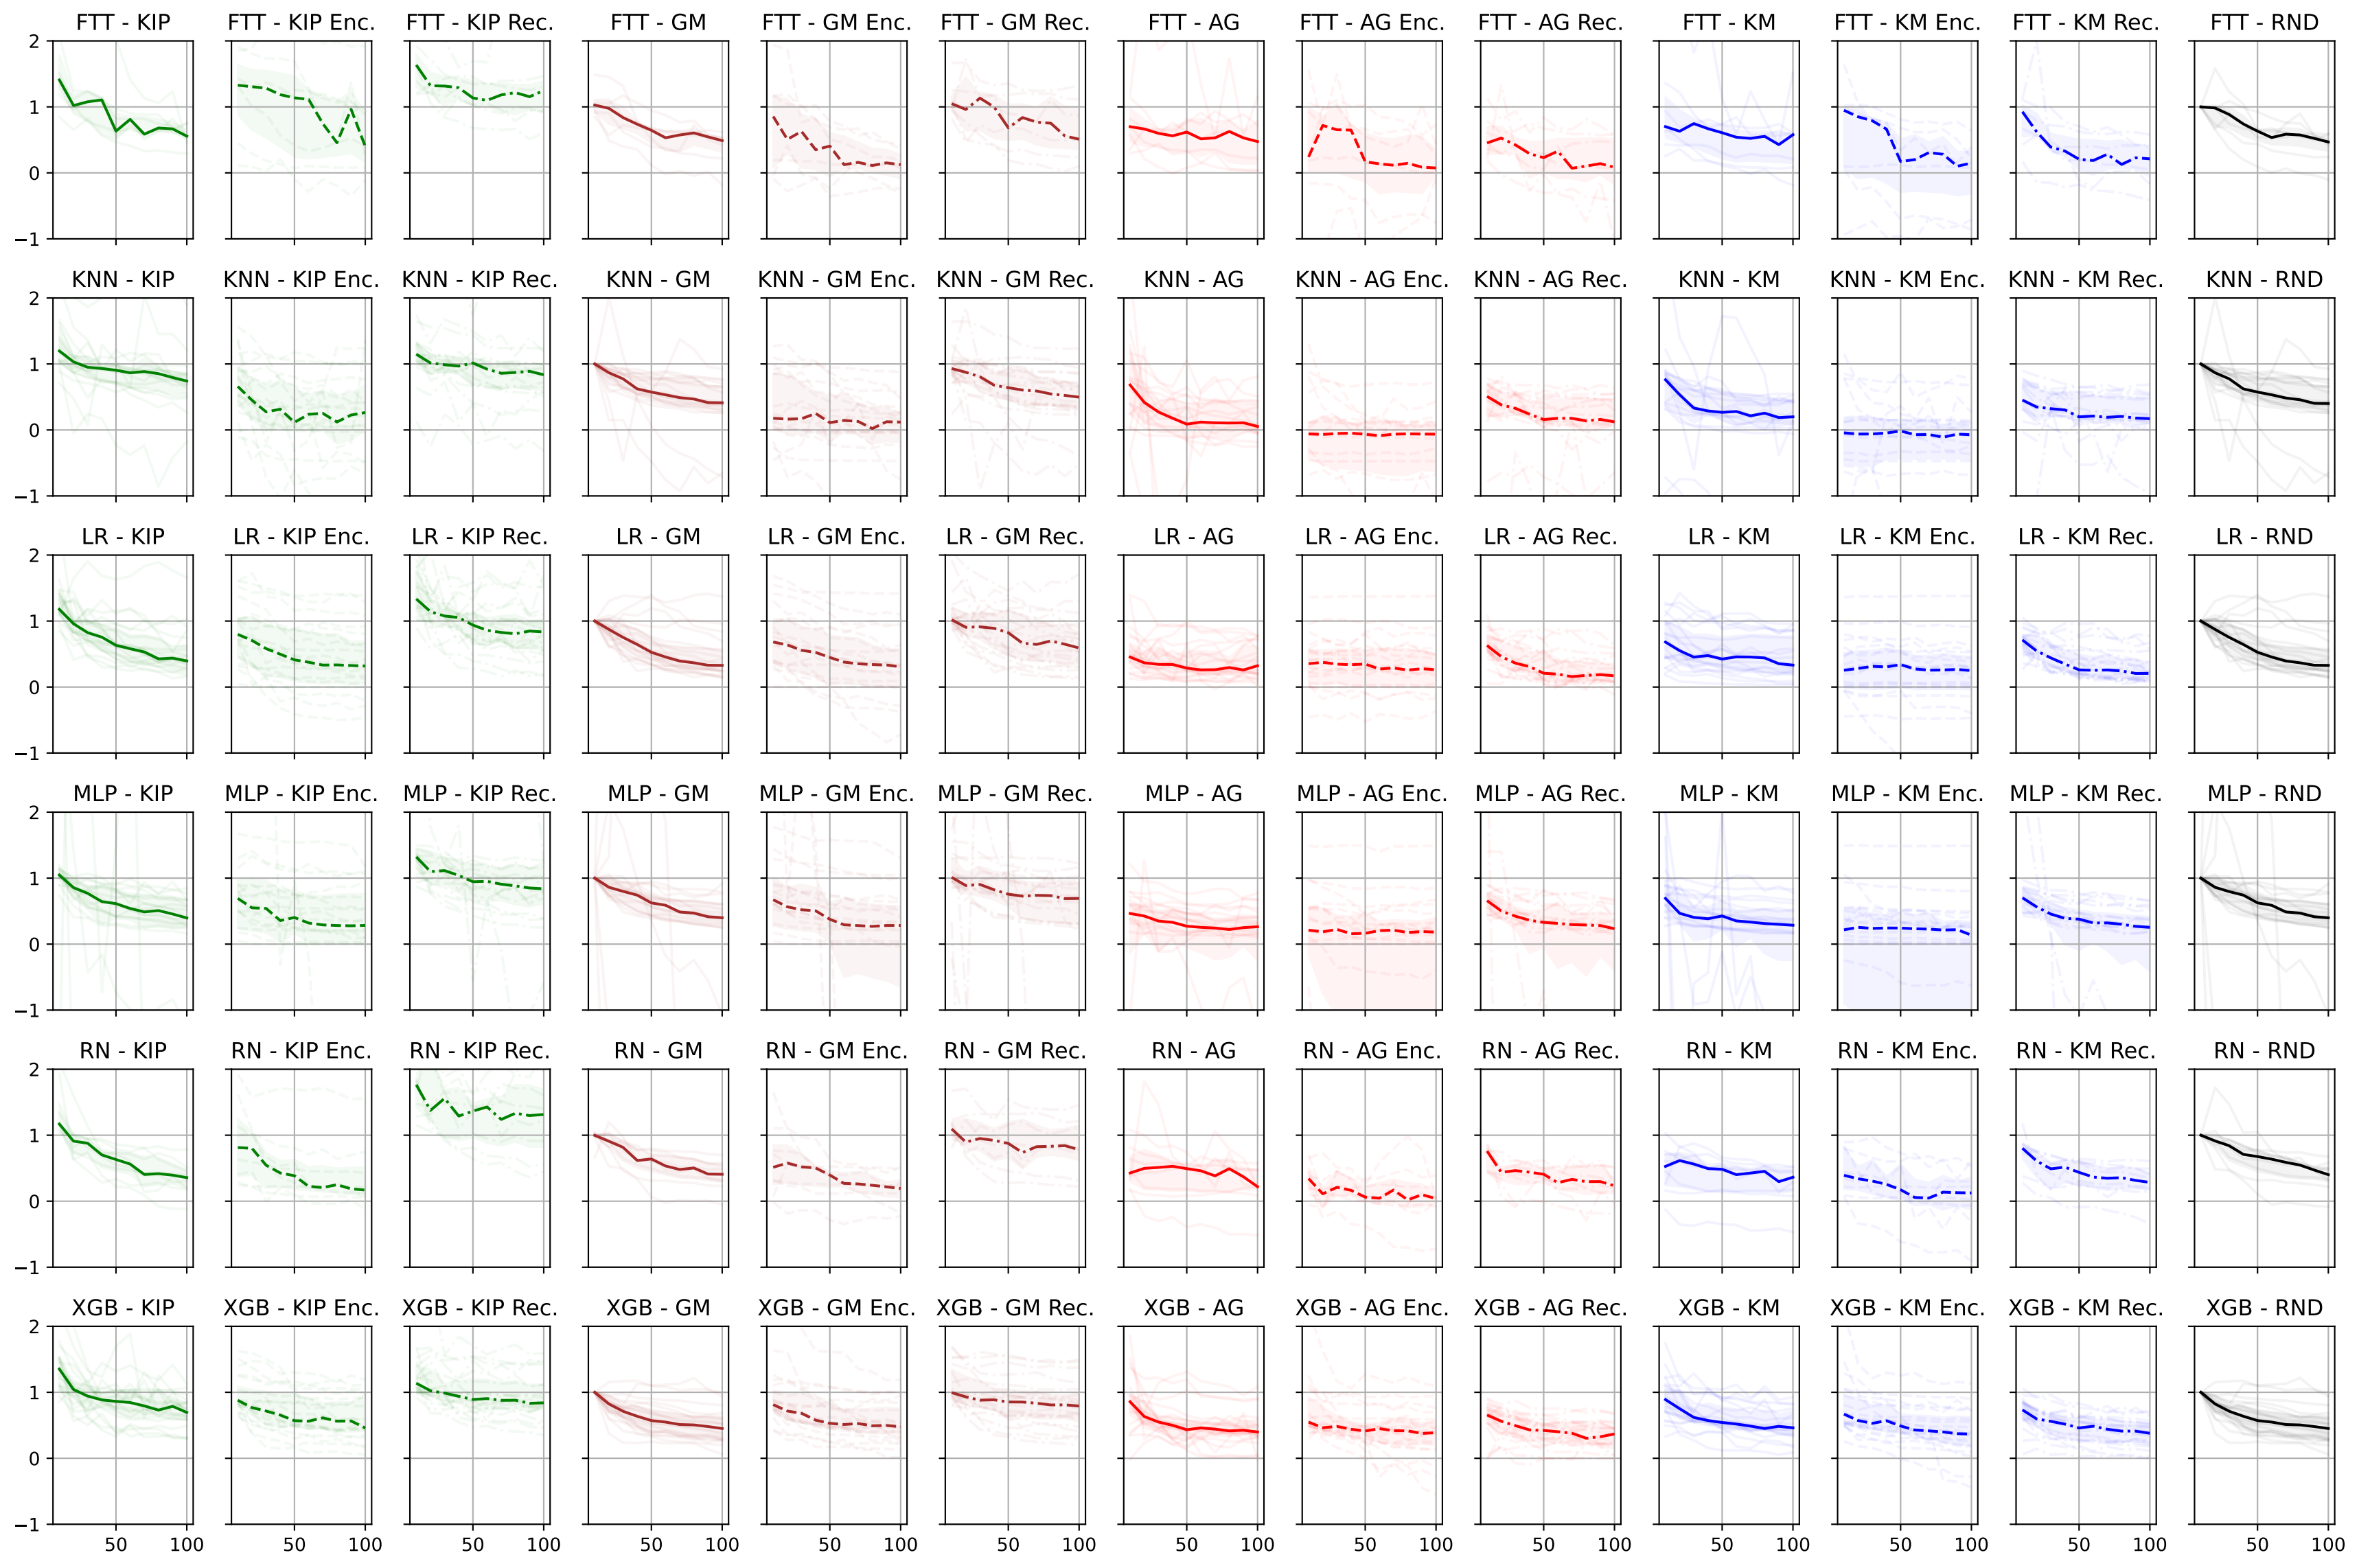

Supplement: supplementary_material [file attachment]

AG

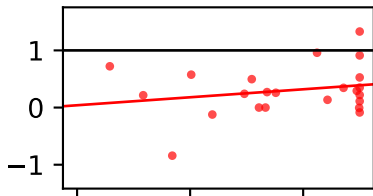

GM

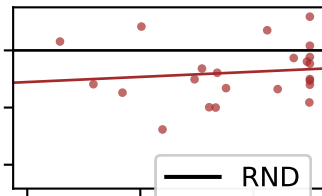

KIP

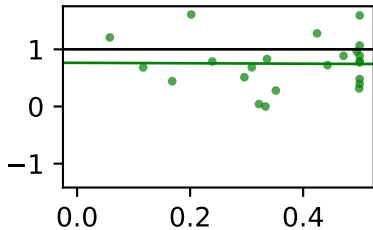

KM

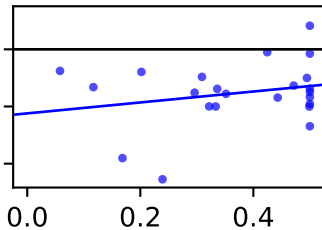

Minority Label Ratio

Supplement: supplementary_material [file attachment]

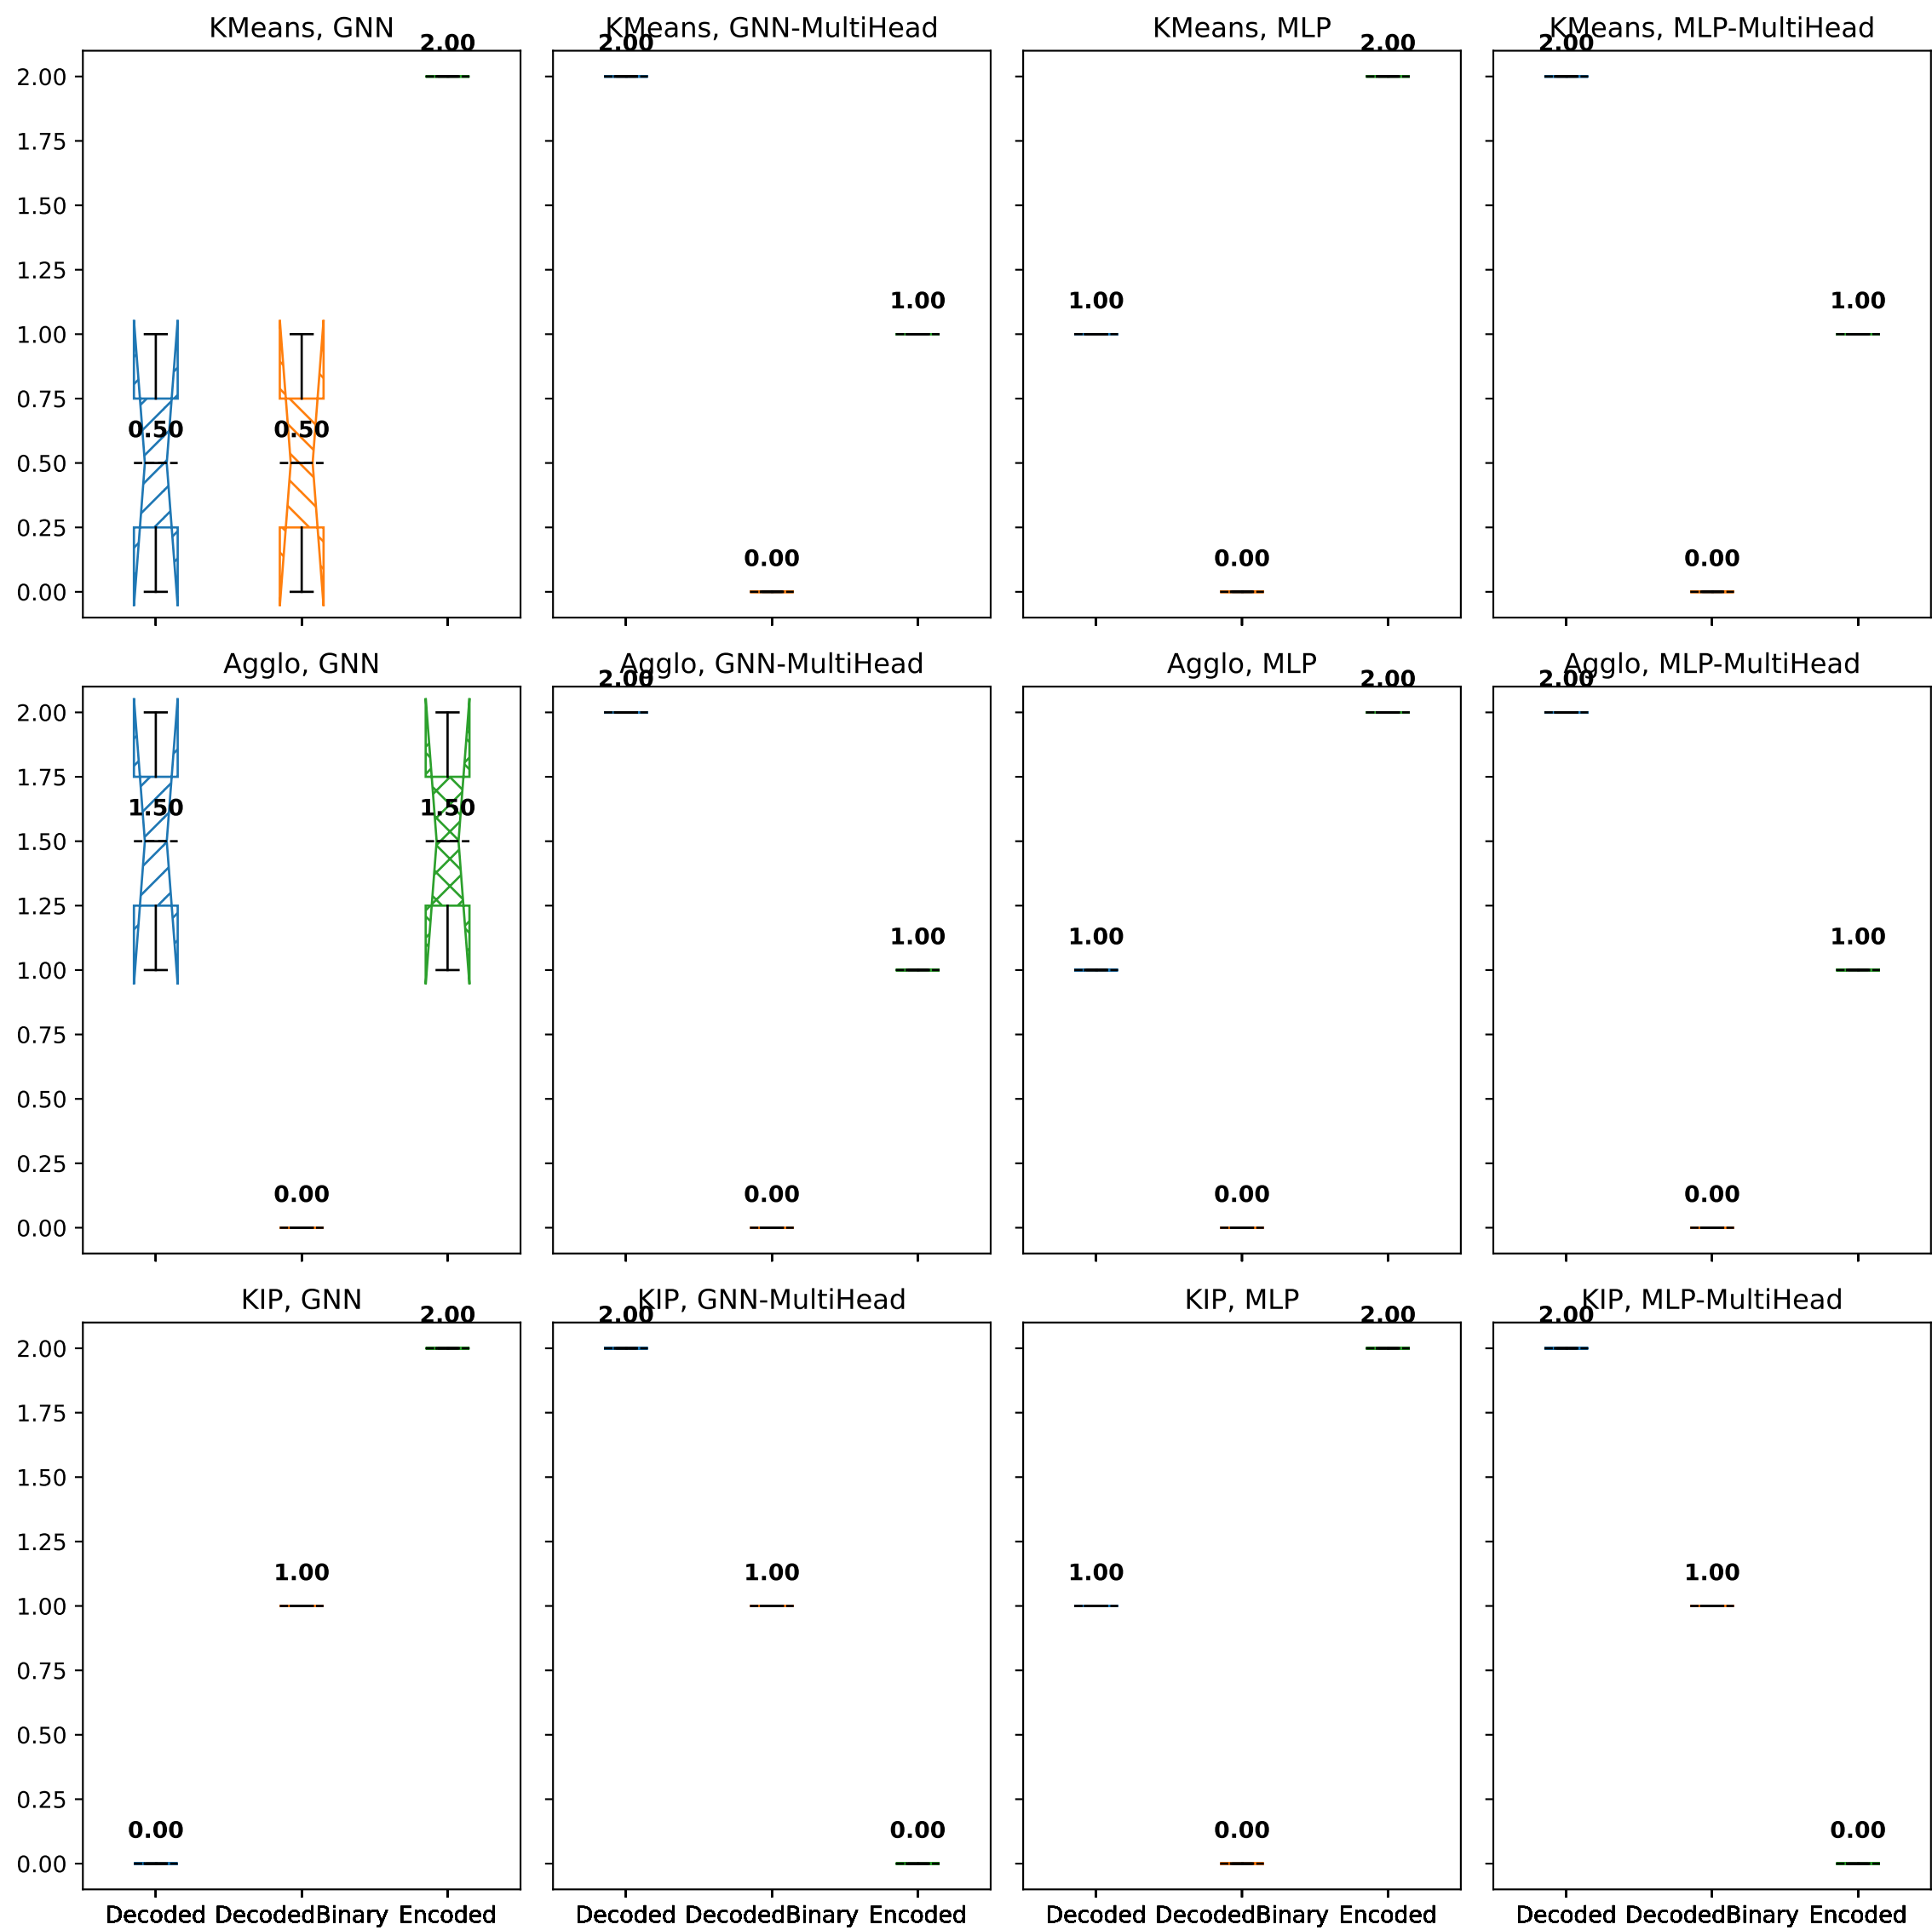

Supplement: supplementary_material [file attachment]

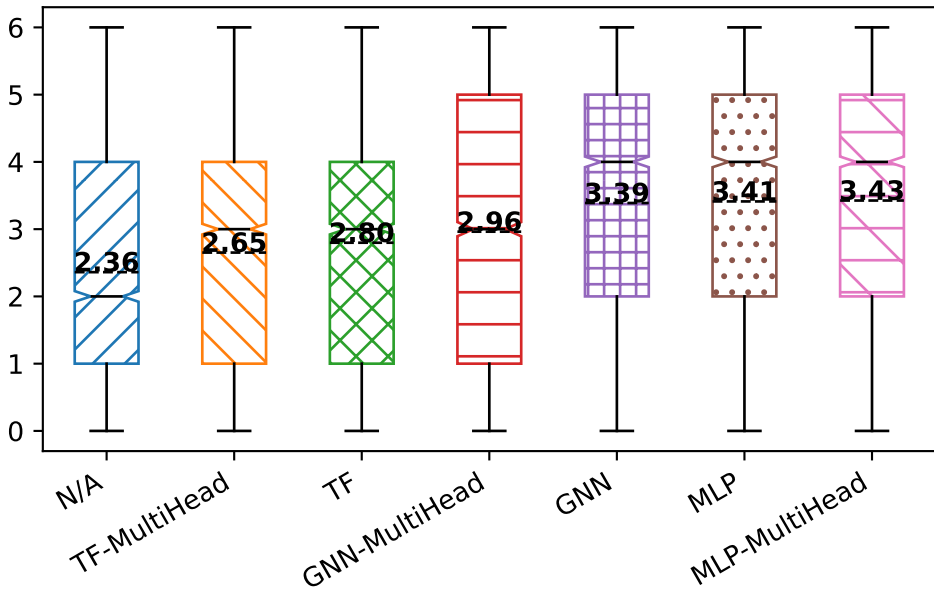

Supplement: supplementary_material [file attachment]

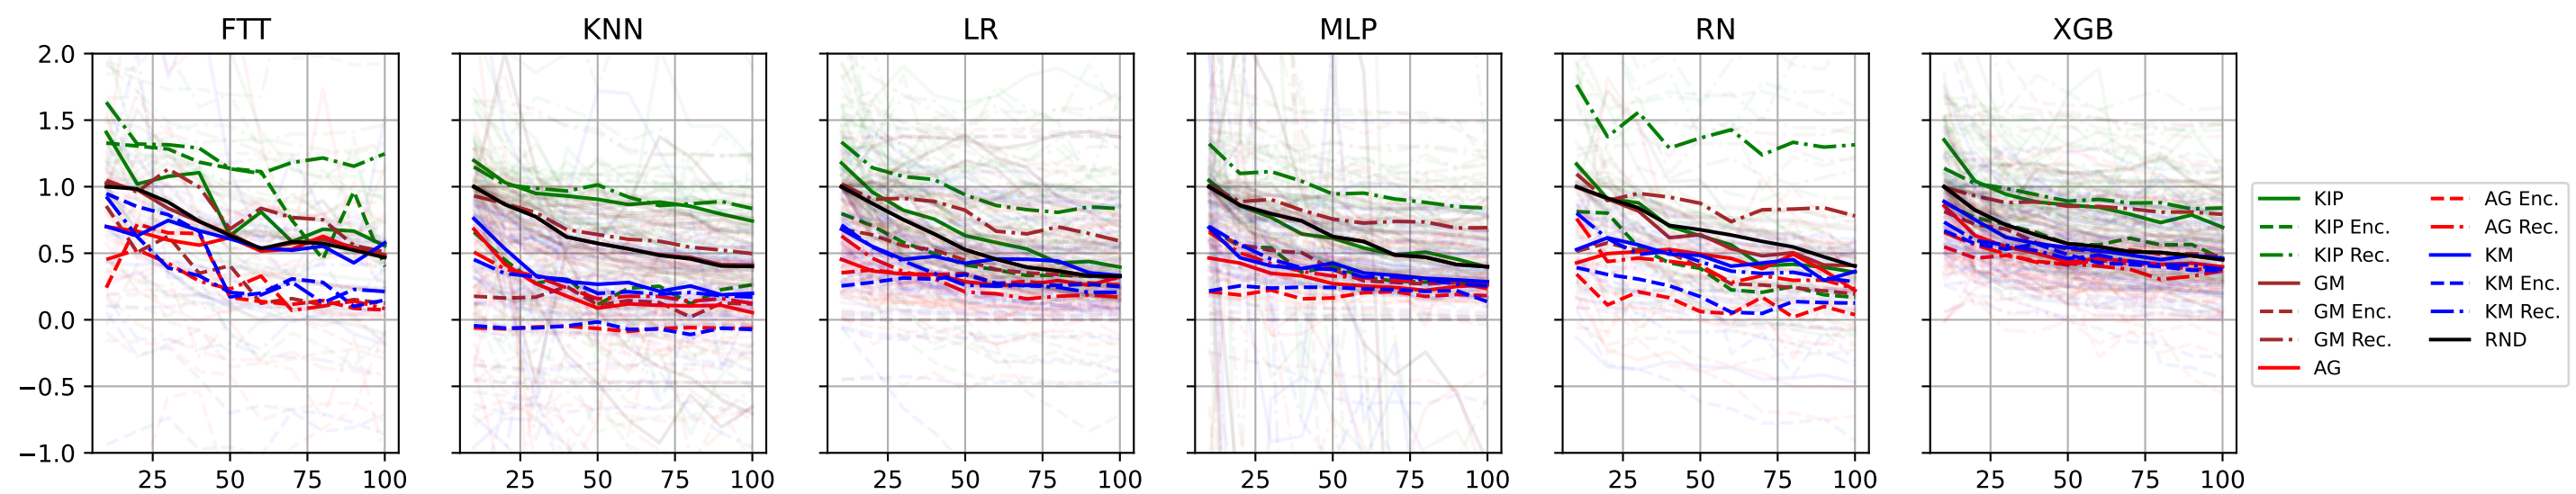

Supplement: supplementary_material [file attachment]

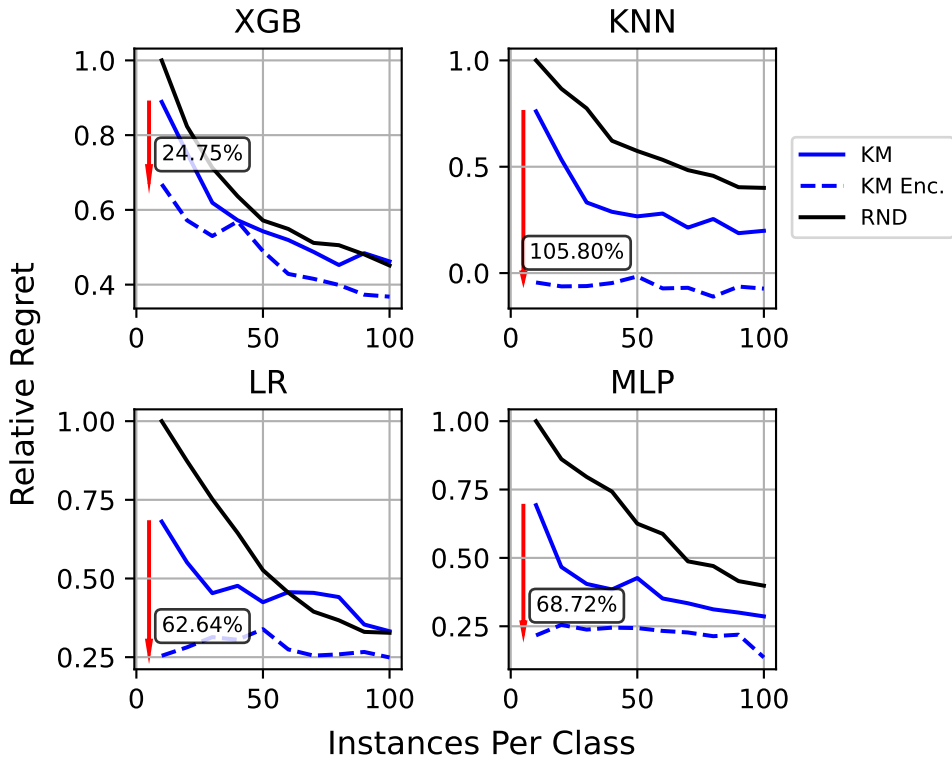

Supplement: supplementary_material [file attachment]

Rank per Classifier by DM and Encoder

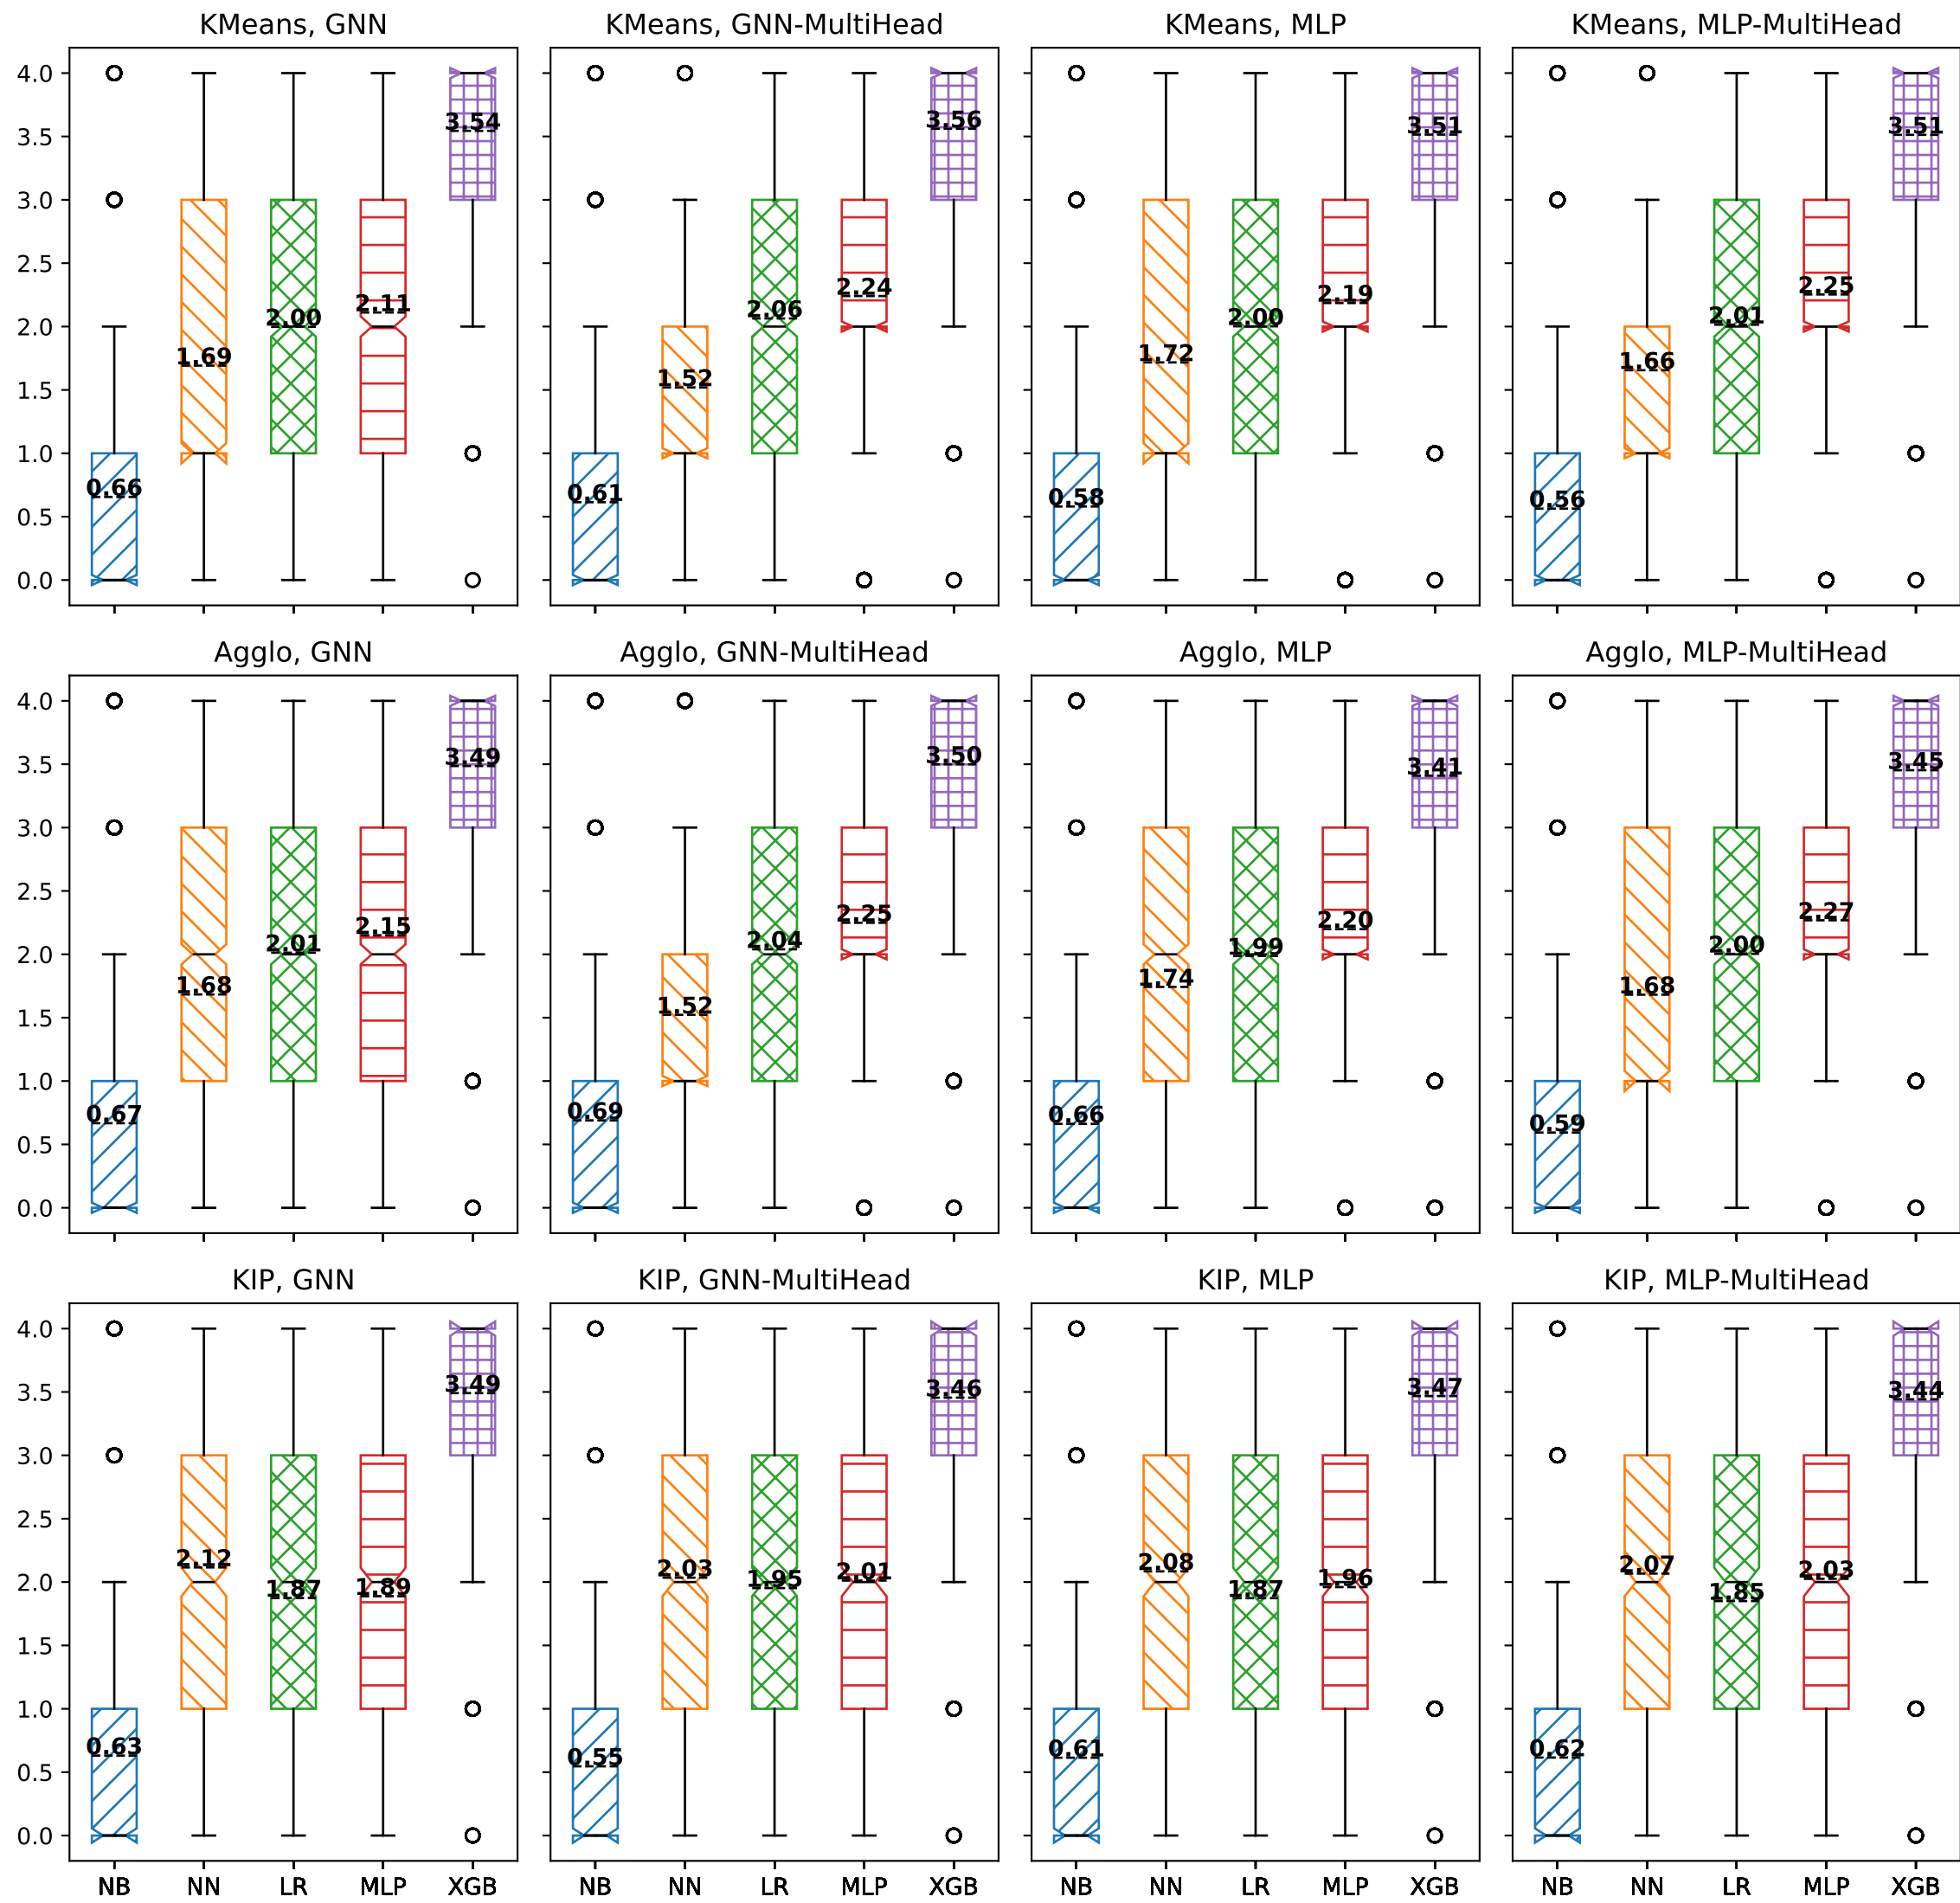

Supplement: supplementary_material [file attachment]

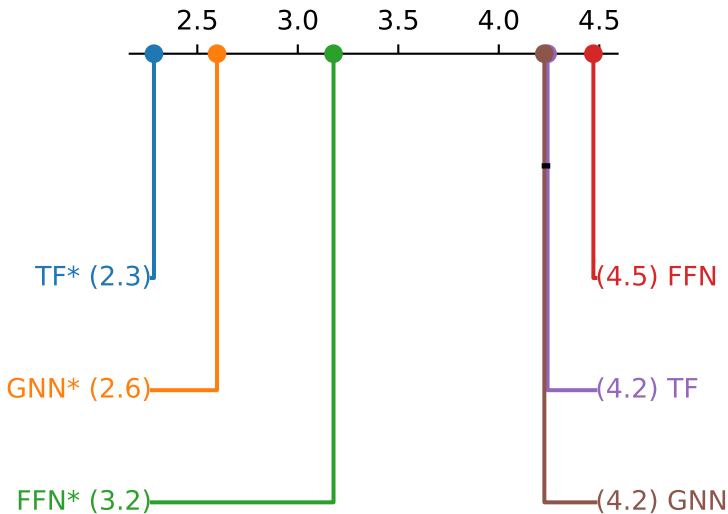

Supplement: supplementary_material [file attachment]

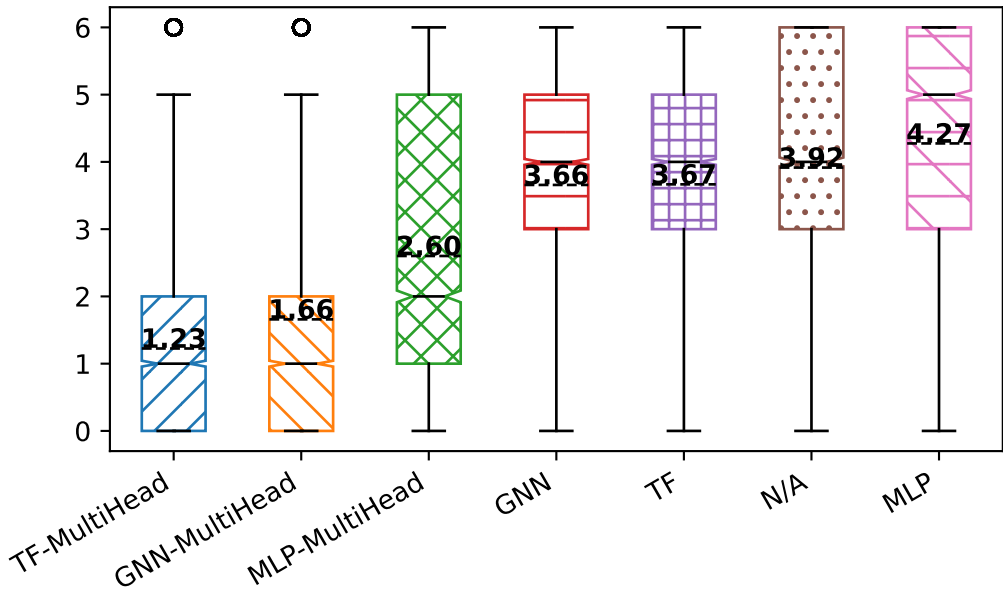

Supplement: supplementary_material [file attachment]

Overall

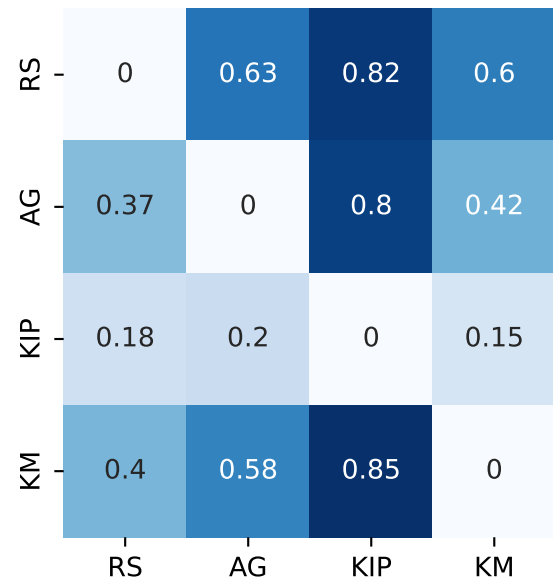

XGBoost

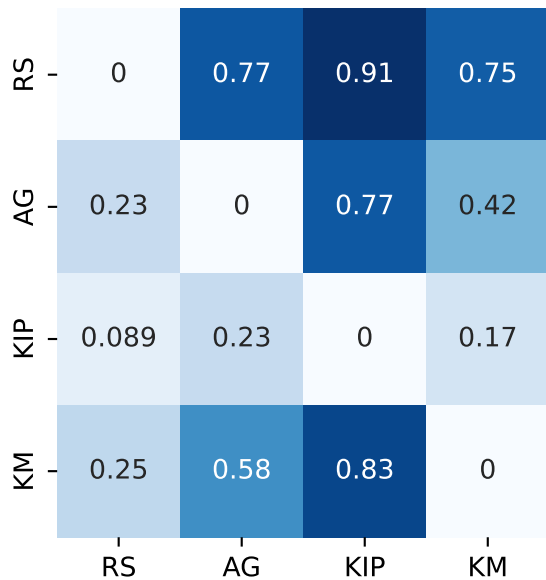

MLP

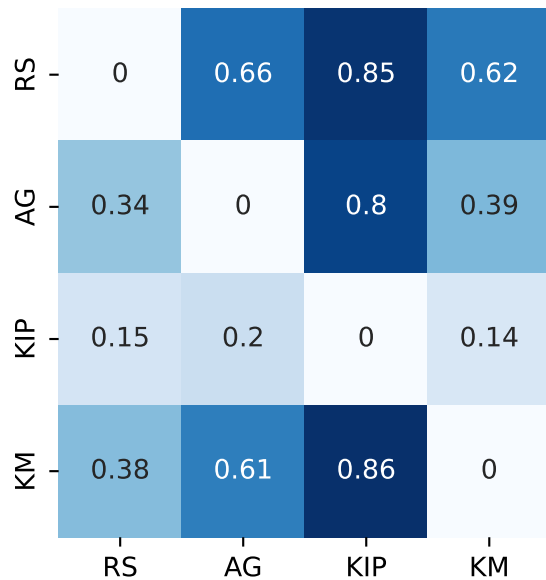

Supplement: supplementary_material [file attachment]
